# Supplementary material for: A risk-associated Active transcriptome phenotype expressed by histologically normal human breast tissue and linked to a pro-tumorigenic adipocyte population
Source: Breast Cancer Res. 2020 Jul 31;22:81. doi: 10.1186/s13058-020-01322-6 (PMC7395362; doi:10.1186/s13058-020-01322-6)
Supplement: Supplementary file 2 — Additional file 2: Supplement Table 1. Lists of genes included within each gene expression signature analyzed to determine Active/Inactive, cAMP lipolysis, adipocyte browning, SASP, AST, IGF1, IGF1R, IFN, TGFβ, and CSR activity scores. Also indicated is their reference sources and method of score calculation. [file 13058_2020_1322_MOESM2_ESM.xlsx]

## Sheet: Signatures metadata
Signature Score	Reference	Calculation Method
Active/Inactive	3. Perez, 2012; 4. Troester, 2016	Signed corrected average
IFN	17. Amara, 2017	Inner product projection onto weight vector
TGFb	17. Amara, 2017	Mean
CSR	17. Amara, 2017	Correlation to directionality vector in signature
macrophage	18. Danaher, 2017	Mean
CD8 Tcell	18. Danaher, 2017	Mean
IGF-ligand signature	16. Mu, 2012	Correlation to directionality vector of correlation to IGF1 expression
IGF-IR activation signature	15. Creighton, 2008	Correlation to directionality vector in signature (non-cell cycle genes)
cAMP	8. Camarda, 2018; 12. Shinoda, 2015	GSVA
SASP	14. Brouwers, 2017	GSVA
AST	14. Brouwers, 2017	GSVA
Fat Browning	13. Wang, 2014	GSVA

## Sheet: Active_Inactive_genes
Gene Symbol	Gene Name	Direction for Signature Score (U: upregulated gene; D: downregulated gene)	IQR in F batch	In Fig1A heatmap	Fig1 Color Annotation
HIST1H4J	Histone 1, H4j	D	5.21518	Yes
PIP	Prolactin-induced protein	D	4.68097	Yes
SCGB1D2	Secretoglobin, family 1D, member 2	D	4.58192	Yes
MIA	Melanoma inhibitory activity	D	3.79025	Yes	gray
S100A8	S100 calcium binding protein A8 (calgranulin A)	U	3.47684	Yes
HIST1H4L	Histone 1, H4l	U	3.4134	Yes
HIST1H4I	Histone 1, H4i	D	3.30924	Yes
CALML5	Calmodulin-like 5	D	3.16276	Yes	gray
DES	Desmin	U	3.10487	Yes
SCGB3A1	Secretoglobin, family 3A, member 1	D	3.07363	Yes
SAA4	Serum amyloid A4, constitutive	U	2.94667	Yes	orange
LCN2	Lipocalin 2 (oncogene 24p3)	D	2.91996	Yes
SAA1	Serum amyloid A1	U	2.88576	Yes
MT1G	Metallothionein 1G	D	2.86541	Yes
MMP7	Matrix metalloproteinase 7 (matrilysin, uterine)	D	2.73772	Yes	gray
C19orf33	Chromosome 19 open reading frame 33	D	2.71531	Yes
IL17B	Interleukin 17B	D	2.69567	Yes	gray
DEFB1	Defensin, beta 1	D	2.6865	Yes
SCD	Stearoyl-CoA desaturase (delta-9-desaturase)	U	2.67145	Yes	orange
KLK8	Kallikrein 8 (neuropsin/ovasin)	D	2.59929	Yes	gray
FAM3D	Family with sequence similarity 3, member D	D	2.59439	Yes	gray
CRABP1	Cellular retinoic acid binding protein 1	D	2.5794	Yes
LEP	Leptin (obesity homolog, mouse)	U	2.56685	Yes	orange
MARCO	Macrophage receptor with collagenous structure	U	2.56486	Yes	orange
CITED1	Cbp/p300-interacting transactivator, with Glu/Asp-rich carboxy-terminal domain, 1	D	2.54161	Yes	gray
PLA2G2A	Phospholipase A2, group IIA (platelets, synovial fluid)	U	2.53342	Yes	orange
AGR2	Anterior gradient 2 homolog (Xenopus laevis)	D	2.51475	Yes	gray
PCK1	Phosphoenolpyruvate carboxykinase 1 (soluble)	U	2.50318	Yes	orange
SAA2	Serum amyloid A2	U	2.49296	Yes
DGAT2	Diacylglycerol O-acyltransferase homolog 2 (mouse)	U	2.4675	Yes	orange
HBA1	Hemoglobin, alpha 1	U	2.44813	Yes	orange
KRT6B	Keratin 6B	D	2.41278	Yes	gray
SERPINA1	Serine (or cysteine) proteinase inhibitor, clade A (alpha-1 antiproteinase, antitrypsin), member 1	D	2.38394	Yes
S100A9	S100 calcium binding protein A9 (calgranulin B)	D	2.37139	Yes
FABP4	Fatty acid binding protein 4, adipocyte	U	2.36588	Yes	orange
DLK1	Delta-like 1 homolog (Drosophila)	D	2.33534	Yes
HBA2	Hemoglobin, alpha 2	U	2.32724	Yes	orange
NPR3	Natriuretic peptide receptor C/guanylate cyclase C (atrionatriuretic peptide receptor C)	U	2.3165	Yes	orange
THRSP	Thyroid hormone responsive (SPOT14 homolog, rat)	U	2.30243	Yes	orange
CCL4	Chemokine (C-C motif) ligand 4	U	2.29459	Yes	orange
HBB	Hemoglobin, beta	U	2.2889	Yes	orange
PRG4	Proteoglycan 4	U	2.27108	Yes	orange
UBD	Ubiquitin D	D	2.26369	Yes	gray
CES1	Carboxylesterase 1 (monocyte/macrophage serine esterase 1)	U	2.26199	Yes	orange
ROPN1	Ropporin, rhophilin associated protein 1	D	2.257	Yes	gray
TREM2	Triggering receptor expressed on myeloid cells 2	D	2.24768	Yes
UCHL1	Ubiquitin carboxyl-terminal esterase L1 (ubiquitin thiolesterase)	U	2.23118	Yes	orange
PIGR	Polymeric immunoglobulin receptor	D	2.22932	Yes	gray
HSPB7	Heat shock 27kDa protein family, member 7 (cardiovascular)	U	2.22829	Yes	orange
MB	Myoglobin	D	2.22456	Yes	gray
LPL	Lipoprotein lipase	U	2.22274	Yes	orange
CCL13	Chemokine (C-C motif) ligand 13	U	2.20825	Yes	orange
GPD1	Glycerol-3-phosphate dehydrogenase 1 (soluble)	U	2.20459	Yes	orange
HMGCS2	3-hydroxy-3-methylglutaryl-Coenzyme A synthase 2 (mitochondrial)	D	2.20318	Yes
SLC7A10	Solute carrier family 7, (neutral amino acid transporter, y+ system) member 10	U	2.1864	Yes	orange
CIDEA	Cell death-inducing DFFA-like effector a	U	2.16952	Yes	orange
ELF5	E74-like factor 5 (ets domain transcription factor)	D	2.16685	Yes	gray
FPR1	Formyl peptide receptor 1	U	2.16553	Yes	orange
PNMT	Phenylethanolamine N-methyltransferase	D	2.1617	Yes	gray
CXCL1	Chemokine (C-X-C motif) ligand 1 (melanoma growth stimulating activity, alpha)	D	2.15266	Yes
HLA-DQB2	Major histocompatibility complex, class II, DQ beta 2	D	2.15064	Yes
CCL19	Chemokine (C-C motif) ligand 19	U	2.14753	Yes
SCHIP1	Schwannomin interacting protein 1	D	2.1473	Yes
BARX2	BarH-like homeobox 2	D	2.14318	Yes
CD3D	CD3D antigen, delta polypeptide (TiT3 complex)	D	2.14154	Yes
FABP7	Fatty acid binding protein 7, brain	D	2.1374	Yes	gray
G0S2	Putative lymphocyte G0/G1 switch gene	U	2.13437	Yes	orange
CALB2	Calbindin 2, 29kDa (calretinin)	U	2.13374	Yes	orange
SYT8	Synaptotagmin VIII	D	2.09901	Yes
GYG2	Glycogenin 2	U	2.09317	Yes	orange
CIDEC	Cell death-inducing DFFA-like effector c	U	2.09153	Yes	orange
CCL18	Chemokine (C-C motif) ligand 18 (pulmonary and activation-regulated)	U	2.08704	Yes	orange
SLPI	Secretory leukocyte protease inhibitor (antileukoproteinase)	D	2.08107	Yes	gray
PTTG1	Pituitary tumor-transforming 1	D	2.08065	Yes
AQP5	Aquaporin 5	D	2.07996	Yes	gray
TFCP2L1	Transcription factor CP2-like 1	D	2.07656	Yes	gray
PCOLCE2	Procollagen C-endopeptidase enhancer 2	U	2.0747	Yes	orange
GSTT2	Glutathione S-transferase theta 2	D	2.06864	Yes
GPAM	Glycerol-3-phosphate acyltransferase, mitochondrial	U	2.06811	Yes	orange
PRSS21	Protease, serine, 21 (testisin)	D	2.0635	Yes
SCRG1	Scrapie responsive protein 1	D	2.05989	Yes
LY6D	Lymphocyte antigen 6 complex, locus D	D	2.04962	Yes	gray
TUSC5	Tumor suppressor candidate 5	U	2.04914	Yes	orange
PFKFB1	6-phosphofructo-2-kinase/fructose-2,6-biphosphatase 1	U	2.04823	Yes	orange
THBS4	Thrombospondin 4	U	2.04786	Yes	orange
KIF12	Kinesin family member 12	D	2.04064	Yes	gray
CD36	CD36 antigen (collagen type I receptor, thrombospondin receptor)	U	2.01892	Yes	orange
RBP4	Retinol binding protein 4, plasma	U	2.00983	Yes	orange
TNFRSF17	Tumor necrosis factor receptor superfamily, member 17	D	2.00266	Yes
DNASE1L3	Deoxyribonuclease I-like 3	U	1.99854	Yes	orange
ACSL1	Acyl-CoA synthetase long-chain family member 1	U	1.98766	Yes	orange
RAB3C	RAB3C, member RAS oncogene family	U	1.98705	Yes	orange
AQP7	Aquaporin 7	U	1.98135	Yes	orange
PDE3B	Phosphodiesterase 3B, cGMP-inhibited	U	1.98095	Yes	orange
FOXA1	Forkhead box A1	D	1.97844	Yes	gray
KRT6A	Keratin 6A	D	1.97785	Yes	gray
CHI3L1	Chitinase 3-like 1 (cartilage glycoprotein-39)	D	1.9744	Yes	gray
KRT15	Keratin 15	D	1.97335	Yes	gray
MAL	Mal, T-cell differentiation protein	D	1.96873	Yes
TCEAL2	Transcription elongation factor A (SII)-like 2	D	1.96515	Yes	gray
CPNE7	Copine VII	D	1.95786	Yes
CDR1	Cerebellar degeneration-related protein 1, 34kDa	U	1.95512	Yes	orange
PRKAR2B	Protein kinase, cAMP-dependent, regulatory, type II, beta	U	1.94965	Yes	orange
PI16	Protease inhibitor 16	U	1.94223	Yes	orange
KIF25	Kinesin family member 25	U	1.94189	Yes	orange
KCTD14	Potassium channel tetramerisation domain containing 14	D	1.94147	Yes	gray
SGCG	Sarcoglycan, gamma (35kDa dystrophin-associated glycoprotein)	U	1.94103	Yes	orange
CCL21	Chemokine (C-C motif) ligand 21	D	1.93397	Yes
CCL28	Chemokine (C-C motif) ligand 28	D	1.9338	Yes	gray
ATP6V0A4	ATPase, H+ transporting, lysosomal V0 subunit a isoform 4	D	1.9332	Yes	gray
LGALS12	Lectin, galactoside-binding, soluble, 12 (galectin 12)	U	1.9258	Yes	orange
BIK	BCL2-interacting killer (apoptosis-inducing)	D	1.92487	Yes	gray
SLC19A3	Solute carrier family 19, member 3	U	1.92463	Yes	orange
AKR1C3	Aldo-keto reductase family 1, member C3 (3-alpha hydroxysteroid dehydrogenase, type II)	U	1.92155	Yes	orange
LIPE	Lipase, hormone-sensitive	U	1.91657	Yes	orange
KRT19	Keratin 19	D	1.91088	Yes	gray
ATP6V1B1	ATPase, H+ transporting, lysosomal 56/58kDa, V1 subunit B, isoform 1 (Renal tubular acidosis with deafness)	D	1.91039	Yes	gray
SPDEF	SAM pointed domain containing ets transcription factor	D	1.90932	Yes	gray
PPP1R1A	Protein phosphatase 1, regulatory (inhibitor) subunit 1A	U	1.90547	Yes	orange
LY96	Lymphocyte antigen 96	U	1.90451	Yes	orange
SOSTDC1	Sclerostin domain containing 1	D	1.89642	Yes	gray
NMB	Neuromedin B	U	1.89563	Yes	orange
KRTAP3-1	Keratin associated protein 3-1	U	1.89044	Yes
FHL1	Four and a half LIM domains 1	U	1.8892	Yes	orange
CA4	Carbonic anhydrase IV	U	1.88613	Yes	orange
TNMD	Tenomodulin	U	1.88594	Yes	orange
KCNIP2	Kv channel interacting protein 2	U	1.88572	Yes	orange
INSL3	Insulin-like 3 (Leydig cell)	U	1.87773	Yes	orange
FAM3B	Family with sequence similarity 3, member B	D	1.87616	Yes	gray
MMP9	Matrix metalloproteinase 9 (gelatinase B, 92kDa gelatinase, 92kDa type IV collagenase)	U	1.87553	Yes
CLSTN2	Calsyntenin 2	U	1.87536	Yes	orange
KCNN4	Potassium intermediate/small conductance calcium-activated channel, subfamily N, member 4	D	1.87502	Yes	gray
DNAJC12	DnaJ (Hsp40) homolog, subfamily C, member 12	D	1.87184	Yes	gray
HSD11B1	Hydroxysteroid (11-beta) dehydrogenase 1	U	1.87149	Yes	orange
S100P	S100 calcium binding protein P	D	1.84979	Yes
SERPINA3	Serine (or cysteine) proteinase inhibitor, clade A (alpha-1 antiproteinase, antitrypsin), member 3	D	1.83868	Yes	gray
CRHBP	Corticotropin releasing hormone binding protein	U	1.83824	Yes	orange
CEBPA	CCAAT/enhancer binding protein (C/EBP), alpha	U	1.83585	Yes	orange
SLC29A4	Solute carrier family 29 (nucleoside transporters), member 4	U	1.83176	Yes	orange
MMD	Monocyte to macrophage differentiation-associated	U	1.82703	Yes	orange
TIMP4	Tissue inhibitor of metalloproteinase 4	U	1.81906	Yes	orange
KLK11	Kallikrein 11	D	1.81168	Yes	gray
B3GNT3	UDP-GlcNAc:betaGal beta-1,3-N-acetylglucosaminyltransferase 3	D	1.81136	Yes	gray
GSTO2	Glutathione S-transferase omega 2	D	1.80898	Yes	gray
ACVR1C	Activin A receptor, type IC	U	1.80529	Yes	orange
NRTN	Neurturin	D	1.80317	Yes	gray
AOC3	Amine oxidase, copper containing 3 (vascular adhesion protein 1)	U	1.80122	Yes	orange
TCTE3	T-complex-associated-testis-expressed 3	D	1.79893	Yes
WFDC2	WAP four-disulfide core domain 2	D	1.79813	Yes	gray
LTB	Lymphotoxin beta (TNF superfamily, member 3)	D	1.79775	Yes
GZMH	Granzyme H (cathepsin G-like 2, protein h-CCPX)	U	1.79697	Yes
WFDC1	WAP four-disulfide core domain 1	U	1.79602	Yes
WIF1	WNT inhibitory factor 1	D	1.78761	Yes	gray
BEX2	Brain expressed X-linked 2	D	1.78741	Yes	gray
ANXA8	Annexin A8	D	1.78715	Yes	gray
AKR1C1	Aldo-keto reductase family 1, member C2 (dihydrodiol dehydrogenase 2; bile acid binding protein; 3-alpha hydroxysteroid dehydrogenase, type III)	U	1.77673	Yes	orange
FCN1	Ficolin (collagen/fibrinogen domain containing) 1	U	1.77485	Yes	orange
KRT16	Keratin 16 (focal non-epidermolytic palmoplantar keratoderma)	U	1.77234	Yes
MYB	V-myb myeloblastosis viral oncogene homolog (avian)	D	1.77156	Yes	gray
CETP	Cholesteryl ester transfer protein, plasma	U	1.76711	Yes	orange
AGPAT2	1-acylglycerol-3-phosphate O-acyltransferase 2 (lysophosphatidic acid acyltransferase, beta)	U	1.76035	Yes	orange
KRT23	Keratin 23 (histone deacetylase inducible)	D	1.76028	Yes	gray
ME1	Malic enzyme 1, NADP(+)-dependent, cytosolic	U	1.75826	Yes	orange
GABRP	Gamma-aminobutyric acid (GABA) A receptor, pi	D	1.75478	Yes	gray
HSD17B2	Hydroxysteroid (17-beta) dehydrogenase 2	D	1.74303	Yes	gray
TCF15	Transcription factor 15 (basic helix-loop-helix)	U	1.74112	Yes	orange
IL6	Interleukin 6 (interferon, beta 2)	U	1.74083	Yes	orange
ALDH4A1	Aldehyde dehydrogenase 4 family, member A1	U	1.74015	Yes	orange
PROM1	Prominin 1	D	1.73947	Yes	gray
OXCT2	3-oxoacid CoA transferase 2	D	1.73876	Yes
CYP4B1	Cytochrome P450, family 4, subfamily B, polypeptide 1	U	1.73497	Yes	orange
FASN	Fatty acid synthase	U	1.73012	Yes	orange
ELOVL6	ELOVL family member 6, elongation of long chain fatty acids (FEN1/Elo2, SUR4/Elo3-like, yeast)	U	1.72519	Yes	orange
RNASE1	Ribonuclease, RNase A family, 1 (pancreatic)	U	1.72263	Yes	orange
TRPV6	Transient receptor potential cation channel, subfamily V, member 6	D	1.7061	Yes	gray
PHLDA2	Pleckstrin homology-like domain, family A, member 2	D	1.70469	Yes	gray
SIX1	Sine oculis homeobox homolog 1 (Drosophila)	U	1.70256	Yes	orange
KLK5	Kallikrein 5	D	1.70064	Yes
TFPI2	Tissue factor pathway inhibitor 2	U	1.69544	Yes
MGST1	Microsomal glutathione S-transferase 1	U	1.69538	Yes	orange
ITGA7	Integrin, alpha 7	U	1.69299	Yes	orange
GJB1	Gap junction protein, beta 1, 32kDa (connexin 32, Charcot-Marie-Tooth neuropathy, X-linked)	D	1.69265	Yes	gray
CXCL2	Chemokine (C-X-C motif) ligand 2	D	1.68876	Yes
TNNI2	Troponin I, skeletal, fast	D	1.68381	Yes	gray
MOGAT1	Monoacylglycerol O-acyltransferase 1	U	1.68359	Yes	orange
COX4I2	Cytochrome c oxidase subunit IV isoform 2 (lung)	U	1.68341	Yes	orange
SFRP4	Secreted frizzled-related protein 4	U	1.6834	Yes	orange
IGLL1	Immunoglobulin lambda-like polypeptide 1	D	1.68029	Yes
TACSTD2	Tumor-associated calcium signal transducer 2	D	1.67978	Yes	gray
SIGLEC7	Sialic acid binding Ig-like lectin 7	U	1.67909	Yes
PSORS1C1	Psoriasis susceptibility 1 candidate 1	D	1.67465	Yes
TMPRSS2	Transmembrane protease, serine 2	D	1.67461	Yes	gray
COMP	Cartilage oligomeric matrix protein	U	1.67406	Yes	orange
AREG	Amphiregulin (schwannoma-derived growth factor)	D	1.67362	Yes
PPARG	Peroxisome proliferative activated receptor, gamma	U	1.67002	Yes	orange
TAX1BP3	Tax1 (human T-cell leukemia virus type I) binding protein 3	U	1.6633	Yes
MUC1	Mucin 1, transmembrane	D	1.66046	Yes	gray
KIT	V-kit Hardy-Zuckerman 4 feline sarcoma viral oncogene homolog	D	1.65957	Yes	gray
PTHLH	Parathyroid hormone-like hormone	D	1.65943	Yes
EPHB3	EPH receptor B3	D	1.65805	Yes	gray
EGF	Epidermal growth factor (beta-urogastrone)	D	1.65376	Yes	gray
PYGL	Phosphorylase, glycogen; liver (Hers disease, glycogen storage disease type VI)	U	1.65214	Yes	orange
ACACB	Acetyl-Coenzyme A carboxylase beta	U	1.6515	Yes	orange
RDH5	Retinol dehydrogenase 5 (11-cis and 9-cis)	U	1.6502	Yes	orange
FOLR2	Folate receptor 2 (fetal)	U	1.64951	Yes	orange
PCSK1N	Proprotein convertase subtilisin/kexin type 1 inhibitor	U	1.64828	Yes
GPR20	G protein-coupled receptor 20	D	1.64804	Yes
HPD	4-hydroxyphenylpyruvate dioxygenase	D	1.64588	Yes
SPP1	Secreted phosphoprotein 1 (osteopontin, bone sialoprotein I, early T-lymphocyte activation 1)	D	1.64215	Yes
TFF3	Trefoil factor 3 (intestinal)	D	1.6383	Yes
IRX1	Iroquois homeobox protein 1	D	1.6382	Yes	gray
KYNU	Kynureninase (L-kynurenine hydrolase)	D	1.63771	Yes
OXTR	Oxytocin receptor	D	1.63483	Yes	gray
IRX4	Iroquois homeobox protein 4	D	1.63349	Yes	gray
NPY1R	Neuropeptide Y receptor Y1	U	1.62901	Yes	orange
DHRS9	Dehydrogenase/reductase (SDR family) member 9	U	1.62655	Yes	orange
CPA3	Carboxypeptidase A3 (mast cell)	U	1.62469	Yes	orange
TFAP2C	Transcription factor AP-2 gamma (activating enhancer binding protein 2 gamma)	D	1.62037	Yes	gray
FOLR1	Folate receptor 1 (adult)	D	1.61149	Yes	gray
HSPA12A	Heat shock 70kDa protein 12A	U	1.60562	Yes	orange
SORBS1	Sorbin and SH3 domain containing 1	U	1.6042	Yes	orange
PKD1L2	Polycystic kidney disease 1-like 2	U	1.60414	Yes	orange
FAH	Fumarylacetoacetate hydrolase (fumarylacetoacetase)	U	1.60209	Yes	orange
ACTA1	Actin, alpha 1, skeletal muscle	U	1.59868	Yes
ALDH2	Aldehyde dehydrogenase 2 family (mitochondrial)	U	1.59594	Yes	orange
NRG1	Neuregulin 1	D	1.59277	Yes	gray
CTSG	Cathepsin G	U	1.58589	Yes	orange
CLDN14	Claudin 14	D	1.58369	Yes
FBXO16	F-box protein 16	D	1.58135	Yes	gray
GREM1	Gremlin 1 homolog, cysteine knot superfamily (Xenopus laevis)	U	1.57963	Yes	orange
DCX	Doublecortex; lissencephaly, X-linked (doublecortin)	D	1.57673	Yes
APOB	Apolipoprotein B (including Ag(x) antigen)	U	1.576	Yes
MAOA	Monoamine oxidase A	U	1.57451	Yes	orange
PTN	Pleiotrophin (heparin binding growth factor 8, neurite growth-promoting factor 1)	D	1.57118	Yes	gray
MGLL	Monoglyceride lipase	U	1.57045	Yes	orange
CLDN3	Claudin 3	D	1.56932	Yes	gray
FA2H	Fatty acid 2-hydroxylase	D	1.56919	Yes	gray
HP	Haptoglobin	U	1.56837	Yes	orange
MT1A	Metallothionein 1A (functional)	D	1.56656	Yes
SERPINB5	Serine (or cysteine) proteinase inhibitor, clade B (ovalbumin), member 5	D	1.56582	Yes	gray
CYP26B1	Cytochrome P450, family 26, subfamily B, polypeptide 1	U	1.56557	Yes	orange
CYP2J2	Cytochrome P450, family 2, subfamily J, polypeptide 2	D	1.56473	Yes	gray
ABCC6	ATP-binding cassette, sub-family C (CFTR/MRP), member 6	U	1.56355	Yes	orange
GPX3	Glutathione peroxidase 3 (plasma)	U	1.56226	Yes	orange
NPR1	Natriuretic peptide receptor A/guanylate cyclase A (atrionatriuretic peptide receptor A)	U	1.56222	Yes	orange
BDKRB1	Bradykinin receptor B1	D	1.55948	Yes	orange
TF	Transferrin	U	1.55393	Yes	orange
HS3ST2	Heparan sulfate (glucosamine) 3-O-sulfotransferase 2	U	1.55332	Yes	orange
LHCGR	Luteinizing hormone/choriogonadotropin receptor	U	1.55234	Yes	orange
MCAM	Melanoma cell adhesion molecule	U	1.54984	Yes	orange
RGS20	Regulator of G-protein signalling 20	U	1.54966	Yes
LMO3	LIM domain only 3 (rhombotin-like 2)	U	1.54807	Yes	orange
SCN4A	Sodium channel, voltage-gated, type IV, alpha	U	1.5439	Yes	orange
HSPB8	Heat shock 22kDa protein 8	U	1.54383	Yes
EPB42	Erythrocyte membrane protein band 4.2	U	1.54364	Yes	orange
CGN	Cingulin	D	1.54088	Yes
HOXB7	Homeo box B7	U	1.53965	Yes	orange
COL17A1	Collagen, type XVII, alpha 1	D	1.53727	Yes	gray
NPY5R	Neuropeptide Y receptor Y5	U	1.53238	Yes	orange
SLC5A1	Solute carrier family 5 (sodium/glucose cotransporter), member 1	D	1.53095	Yes
BTNL9	Butyrophilin-like 9	U	1.53068	Yes	orange
WNT6	Wingless-type MMTV integration site family, member 6	D	1.52837	Yes
PAX3	Paired box gene 3 (Waardenburg syndrome 1)	U	1.52383	Yes	orange
ZBTB16	Zinc finger and BTB domain containing 16	U	1.52179	Yes	orange
ALDOC	Aldolase C, fructose-bisphosphate	U	1.52177	Yes	orange
RAMP1	Receptor (calcitonin) activity modifying protein 1	D	1.5187	Yes
SGCA	Sarcoglycan, alpha (50kDa dystrophin-associated glycoprotein)	U	1.51544	Yes	orange
RASL11B	RAS-like, family 11, member B	D	1.51384	Yes
BMP2	Bone morphogenetic protein 2	U	1.51373	Yes	orange
PALM2-AKAP2	PALM2-AKAP2 protein	U	1.51279	Yes	orange
SOX9	SRY (sex determining region Y)-box 9 (campomelic dysplasia, autosomal sex-reversal)	D	1.51071	Yes	gray
F13A1	Coagulation factor XIII, A1 polypeptide	U	1.50984	Yes	orange
CSN1S1	Casein alpha s1	U	1.5097	Yes
PLXNA4	Plexin A4	U	1.50834	Yes	orange
TFAP2B	Transcription factor AP-2 beta (activating enhancer binding protein 2 beta)	D	1.50363	Yes	gray
HAPLN3	Hyaluronan and proteoglycan link protein 3	D	1.50342	Yes	gray
CHRDL2	Chordin-like 2	D	1.50285	Yes
HOXB8	Homeo box B8	U	1.5026	Yes
PNPLA2	Patatin-like phospholipase domain containing 2	U	1.50085	Yes	orange
SLC4A4	Solute carrier family 4, sodium bicarbonate cotransporter, member 4	U	1.49898	Yes	orange
MMP28	Matrix metalloproteinase 28	U	1.49867	Yes	orange
CBLN1	Cerebellin 1 precursor	U	1.49804	Yes	orange
PDK4	Pyruvate dehydrogenase kinase, isoenzyme 4	U	1.49717	Yes	orange
KRTCAP3	Keratinocyte associated protein 3	D	1.49699	Yes	gray
RAB25	RAB25, member RAS oncogene family	D	1.49507	Yes	gray
S100B	S100 calcium binding protein, beta (neural)	U	1.4945	Yes	orange
GJB5	Gap junction protein, beta 5 (connexin 31.1)	D	1.4944	Yes	gray
SPARC	Secreted protein, acidic, cysteine-rich (osteonectin)	U	1.49396	Yes	orange
HK2	Hexokinase 2	U	1.49134	Yes	orange
ADH1A	Alcohol dehydrogenase 1A (class I), alpha polypeptide	U	1.4906	Yes	orange
CAPN13	Calpain 13	D	1.49048	Yes	gray
TFAP2A	Transcription factor AP-2 alpha (activating enhancer binding protein 2 alpha)	D	1.48703	Yes	gray
GZMA	Granzyme A (granzyme 1, cytotoxic T-lymphocyte-associated serine esterase 3)	U	1.48667	Yes
ADM	Adrenomedullin	U	1.486	Yes	orange
ALOX15B	Arachidonate 15-lipoxygenase, second type	D	1.48555	Yes
BATF	Basic leucine zipper transcription factor, ATF-like	D	1.48427	Yes	gray
COL8A1	Collagen, type VIII, alpha 1	U	1.48395	Yes	orange
VLDLR	Very low density lipoprotein receptor	U	1.48315	Yes	orange
CHI3L2	Chitinase 3-like 2	D	1.48216	Yes
HS3ST4	Heparan sulfate (glucosamine) 3-O-sulfotransferase 4	D	1.48147	Yes	gray
ATP1A2	ATPase, Na+/K+ transporting, alpha 2 (+) polypeptide	U	1.48032	Yes	orange
RASL10B	RAS-like, family 10, member B	U	1.47644	Yes	orange
PKMYT1	Membrane-associated tyrosine- and threonine-specific cdc2-inhibitory kinase	D	1.47483	Yes
ALB	Albumin	D	1.47395	Yes
SYT12	Synaptotagmin XII	D	1.47287	Yes	gray
S100A2	S100 calcium binding protein A2	D	1.47248	Yes
LY6G5C	Lymphocyte antigen 6 complex, locus G5C	D	1.47229	Yes
RIBC2	RIB43A domain with coiled-coils 2	D	1.47114	Yes	gray
HIST1H4K	Histone 1, H4k	D	1.47092	Yes
TNFAIP6	Tumor necrosis factor, alpha-induced protein 6	U	1.46819	Yes	orange
DPT	Dermatopontin	U	1.46789	Yes	orange
CDO1	Cysteine dioxygenase, type I	U	1.46783	Yes	orange
IL1RN	Interleukin 1 receptor antagonist	U	1.46566	Yes
SOX10	SRY (sex determining region Y)-box 10	D	1.46142	Yes	gray
CAV3	Caveolin 3	U	1.4607	Yes	orange
PCDH9	Protocadherin 9	U	1.45967	Yes	orange
ASGR2	Asialoglycoprotein receptor 2	D	1.45966	Yes
LGALS1	Lectin, galactoside-binding, soluble, 1 (galectin 1)	U	1.4596	Yes	orange
CAV1	Caveolin 1, caveolae protein, 22kDa	U	1.45887	Yes	orange
ALAS2	Aminolevulinate, delta-, synthase 2 (sideroblastic/hypochromic anemia)	U	1.45475	Yes
OIP5	Opa-interacting protein 5	D	1.45284	Yes
FCGBP	Fc fragment of IgG binding protein	D	1.44986	Yes	gray
S100A4	S100 calcium binding protein A4 (calcium protein, calvasculin, metastasin, murine placental homolog)	U	1.44907	Yes	orange
CYP4X1	Cytochrome P450, family 4, subfamily X, polypeptide 1	U	1.44749	Yes
CYP4F11	Cytochrome P450, family 4, subfamily F, polypeptide 11	D	1.44729	Yes
WNT11	Wingless-type MMTV integration site family, member 11	U	1.43871	Yes	orange
LAD1	Ladinin 1	D	1.43818	Yes	gray
BSPRY	B-box and SPRY domain containing	D	1.43686	Yes	gray
KRT7	Keratin 7	D	1.43679	Yes	gray
NDUFB1	NADH dehydrogenase (ubiquinone) 1 beta subcomplex, 1, 7kDa	U	1.43676	Yes
TREM1	Triggering receptor expressed on myeloid cells 1	U	1.43352	Yes	orange
KCNB1	Potassium voltage-gated channel, Shab-related subfamily, member 1	U	1.43343	Yes	orange
EGR2	Early growth response 2 (Krox-20 homolog, Drosophila)	D	1.43339	Yes	gray
CAPN6	Calpain 6	D	1.43014	Yes
FCGR2B	Fc fragment of IgG, low affinity IIb, receptor for (CD32)	U	1.42946	Yes	orange
PRLR	Prolactin receptor	D	1.42801	Yes	gray
LDHD	Lactate dehydrogenase D	U	1.42659	Yes	orange
HSPA6	Heat shock 70kDa protein 6 (HSP70B')	U	1.42634	Yes	orange
MEOX1	Mesenchyme homeo box 1	U	1.42563	Yes	orange
FXYD3	FXYD domain containing ion transport regulator 3	D	1.42529	Yes	gray
PEMT	Phosphatidylethanolamine N-methyltransferase	U	1.42032	Yes	orange
BCL11A	B-cell CLL/lymphoma 11A (zinc finger protein)	D	1.42014	Yes	gray
STC2	Stanniocalcin 2	D	1.41928	Yes	gray
NKG7	Natural killer cell group 7 sequence	U	1.41918	Yes	orange
CHST4	Carbohydrate (N-acetylglucosamine 6-O) sulfotransferase 4	U	1.41814	Yes	orange
CHRDL1	Chordin-like 1	U	1.4172	Yes	orange
SOX17	SRY (sex determining region Y)-box 17	U	1.41714	Yes	orange
PER1	Period homolog 1 (Drosophila)	U	1.41708	Yes	orange
EEF1A2	Eukaryotic translation elongation factor 1 alpha 2	D	1.41681	Yes
POMC	Proopiomelanocortin (adrenocorticotropin/ beta-lipotropin/ alpha-melanocyte stimulating hormone/ beta-melanocyte stimulating hormone/ beta-endorphin)	U	1.41625	Yes	orange
CACNA1G	Calcium channel, voltage-dependent, alpha 1G subunit	D	1.40687	Yes
FUT3	Fucosyltransferase 3 (galactoside 3(4)-L-fucosyltransferase, Lewis blood group included)	D	1.40669	Yes	gray
MS4A4A	Membrane-spanning 4-domains, subfamily A, member 4	U	1.40542	Yes	orange
IL1B	Interleukin 1, beta	D	1.40502	Yes
NAT8	N-acetyltransferase 8 (camello like)	U	1.40432	Yes
VNN2	Vanin 2	U	1.40041	Yes	orange
PC	Pyruvate carboxylase	U	1.39853	Yes	orange
SOX8	SRY (sex determining region Y)-box 8	D	1.39477	Yes	gray
OASL	2'-5'-oligoadenylate synthetase-like	U	1.39435	Yes
SP5	Sp5 transcription factor	U	1.39236	Yes	orange
HPR	Haptoglobin-related protein	U	1.39151	Yes	orange
TMPRSS3	Transmembrane protease, serine 3	D	1.38957	Yes	gray
LUM	Lumican	U	1.38794	Yes	orange
ELF3	E74-like factor 3 (ets domain transcription factor, epithelial-specific )	D	1.38646	Yes	gray
COPZ2	Coatomer protein complex, subunit zeta 2	U	1.3861	Yes	orange
CH25H	Cholesterol 25-hydroxylase	U	1.38567	Yes	orange
CDKN2B	Cyclin-dependent kinase inhibitor 2B (p15, inhibits CDK4)	U	1.38504	Yes	orange
CDKN2C	Cyclin-dependent kinase inhibitor 2C (p18, inhibits CDK4)	U	1.38502	Yes	orange
RRAD	Ras-related associated with diabetes	D	1.38479	Yes
ECHDC3	Enoyl Coenzyme A hydratase domain containing 3	U	1.38111	Yes	orange
MSX1	Msh homeo box homolog 1 (Drosophila)	U	1.38048	Yes	orange
AMPD1	Adenosine monophosphate deaminase 1 (isoform M)	D	1.37982	Yes
TSKS	Testis-specific kinase substrate	U	1.37929	Yes	orange
CD48	CD48 antigen (B-cell membrane protein)	D	1.37925	Yes
MYL7	Myosin, light polypeptide 7, regulatory	D	1.37848	Yes
PTGER3	Prostaglandin E receptor 3 (subtype EP3)	U	1.37844	Yes	orange
PECR	Peroxisomal trans-2-enoyl-CoA reductase	U	1.3773	Yes	orange
PVRL4	Poliovirus receptor-related 4	D	1.37676	Yes	gray
C4A	Complement component 4B, centromeric	D	1.37521	Yes	gray
CHST9	Carbohydrate (N-acetylgalactosamine 4-0) sulfotransferase 9	D	1.37519	Yes	gray
COL4A1	Collagen, type IV, alpha 1	U	1.37249	Yes	orange
PKP3	Plakophilin 3	D	1.37239	Yes	gray
FBLN2	Fibulin 2	U	1.37172	Yes	orange
NOV	Nephroblastoma overexpressed gene	U	1.37126	Yes	orange
CCL2	Chemokine (C-C motif) ligand 2	U	1.36714	Yes	orange
SLC2A5	Solute carrier family 2 (facilitated glucose/fructose transporter), member 5	U	1.36711	Yes	orange
PSCA	Prostate stem cell antigen	D	1.36666	Yes	gray
PPP1R14C	Protein phosphatase 1, regulatory (inhibitor) subunit 14C	D	1.36456	Yes	gray
CTGF	Connective tissue growth factor	D	1.36374	Yes	orange
CRIP1	Cysteine-rich protein 1 (intestinal)	U	1.35976	Yes	orange
KLF15	Kruppel-like factor 15	U	1.35949	Yes	orange
ECHS1	Enoyl Coenzyme A hydratase, short chain, 1, mitochondrial	U	1.35912	Yes	orange
OGN	Osteoglycin (osteoinductive factor, mimecan)	U	1.35761	Yes	orange
CASKIN1	CASK interacting protein 1	U	1.35761	Yes
FCN3	Ficolin (collagen/fibrinogen domain containing) 3 (Hakata antigen)	U	1.3575	Yes	orange
HLA-DQA1	Major histocompatibility complex, class II, DQ alpha 1	D	1.35721	Yes
GATA3	GATA binding protein 3	D	1.35632	Yes
KLRC1	Killer cell lectin-like receptor subfamily C, member 1	D	1.35611	Yes	gray
RHEBL1	Ras homolog enriched in brain like 1	U	1.35463	Yes
PALMD	Palmdelphin	U	1.35443	Yes	orange
ACAA2	Acetyl-Coenzyme A acyltransferase 2 (mitochondrial 3-oxoacyl-Coenzyme A thiolase)	U	1.35419	Yes	orange
SHANK2	SH3 and multiple ankyrin repeat domains 2	D	1.35326	Yes	gray
ABCC8	ATP-binding cassette, sub-family C (CFTR/MRP), member 8	D	1.35294	Yes	gray
BCHE	Butyrylcholinesterase	U	1.35121	Yes
ERBB3	V-erb-b2 erythroblastic leukemia viral oncogene homolog 3 (avian)	D	1.35064	Yes	gray
SPINT1	Serine protease inhibitor, Kunitz type 1	D	1.34861	Yes	gray
BEX1	Brain expressed, X-linked 1	D	1.34766	Yes
WISP2	WNT1 inducible signaling pathway protein 2	U	1.34611	Yes	orange
SLC1A3	DKFZP547J0410 protein	U	1.34607	Yes	orange
EPPK1	Similar to epiplakin	D	1.34601	Yes	gray
NOX4	NADPH oxidase 4	U	1.34572	Yes	orange
IL1R2	Interleukin 1 receptor, type II	U	1.3447	Yes	orange
ITGB1BP1	Integrin beta 1 binding protein 1	U	1.34305	Yes	orange
RORC	RAR-related orphan receptor C	D	1.34292	Yes	gray
MUC3A	Mucin 3A, intestinal	U	1.34117	Yes
NEBL	Nebulette	D	1.34032	Yes	gray
DDR2	Discoidin domain receptor family, member 2	U	1.34014	Yes	orange
FZD4	Frizzled homolog 4 (Drosophila)	U	1.3397	Yes	orange
DHRS3	Dehydrogenase/reductase (SDR family) member 3	U	1.3365	Yes	orange
FADS3	Fatty acid desaturase 3	U	1.33615	Yes	orange
OSR2	Odd-skipped related 2 (Drosophila)	U	1.33231	Yes	orange
CKS2	CDC28 protein kinase regulatory subunit 2	D	1.33197	Yes
KLF5	Kruppel-like factor 5 (intestinal)	D	1.33101	Yes	gray
KRT17	Keratin 17	D	1.3303	Yes	gray
ASPA	Aspartoacylase (aminoacylase 2, Canavan disease)	U	1.33024	Yes	orange
MAPK10	Mitogen-activated protein kinase 10	U	1.33005	Yes	orange
AQP3	Aquaporin 3	D	1.32943	Yes	gray
BCL2L14	BCL2-like 14 (apoptosis facilitator)	D	1.32854	Yes	gray
LRRC3B	Leucine rich repeat containing 3B	D	1.32769	Yes
ABLIM3	Actin binding LIM protein family, member 3	U	1.32738	Yes	orange
ARHGAP8	Rho GTPase activating protein 8	D	1.3273	Yes	gray
EPAS1	Endothelial PAS domain protein 1	U	1.32704	Yes	orange
IL7R	Interleukin 7 receptor	D	1.3253	Yes
FABP5	Fatty acid binding protein 5 (psoriasis-associated)	U	1.32428	Yes	orange
AGT	Angiotensinogen (serine (or cysteine) proteinase inhibitor, clade A (alpha-1 antiproteinase, antitrypsin), member 8)	U	1.32279	Yes
GZMB	Granzyme B (granzyme 2, cytotoxic T-lymphocyte-associated serine esterase 1)	U	1.32189	Yes	orange
CHST8	Carbohydrate (N-acetylgalactosamine 4-0) sulfotransferase 8	D	1.32188	Yes
IGFBP6	Insulin-like growth factor binding protein 6	U	1.32183	Yes	orange
SERPINE1	Serine (or cysteine) proteinase inhibitor, clade E (nexin, plasminogen activator inhibitor type 1), member 1	D	1.32166	Yes
GABRE	Gamma-aminobutyric acid (GABA) A receptor, epsilon	U	1.32102	Yes	orange
CXCL9	Chemokine (C-X-C motif) ligand 9	U	1.31779	Yes
FTCD	Formiminotransferase cyclodeaminase	D	1.31657	Yes
TRPS1	Trichorhinophalangeal syndrome I	D	1.31643	Yes	gray
CAPZA2	Capping protein (actin filament) muscle Z-line, alpha 2	U	1.31551	Yes
S100A1	S100 calcium binding protein A1	U	1.3127	Yes	orange
TAT	Tyrosine aminotransferase	D	1.31195	Yes	gray
HK3	Hexokinase 3 (white cell)	U	1.31167	Yes	orange
MYCT1	Myc target 1	U	1.31141	Yes	orange
CRHR1	Corticotropin releasing hormone receptor 1	D	1.31075	Yes
NUDT10	Nudix (nucleoside diphosphate linked moiety X)-type motif 10	D	1.31031	Yes
COBL	Cordon-bleu homolog (mouse)	D	1.30986	Yes	gray
CKB	Creatine kinase, brain	U	1.30951	Yes	orange
B3GAT1	Beta-1,3-glucuronyltransferase 1 (glucuronosyltransferase P)	D	1.30933	Yes	gray
ACTG2	Actin, gamma 2, smooth muscle, enteric	D	1.30888	Yes	gray
CILP	Cartilage intermediate layer protein, nucleotide pyrophosphohydrolase	U	1.30868	Yes	orange
ALOX5AP	Arachidonate 5-lipoxygenase-activating protein	U	1.30695	Yes	orange
MFI2	Antigen p97 (melanoma associated) identified by monoclonal antibodies 133.2 and 96.5	D	1.30674	Yes	gray
KCNK1	Potassium channel, subfamily K, member 1	D	1.30539	Yes	gray
GPBAR1	G protein-coupled bile acid receptor 1	U	1.30331	Yes	orange
RHAG	Rhesus blood group-associated glycoprotein	D	1.30294	Yes
CXCL3	Chemokine (C-X-C motif) ligand 3	D	1.30137	Yes
CAT	Catalase	U	1.29986	Yes	orange
LIPC	Lipase, hepatic	D	1.29975	Yes
LRRC15	Leucine rich repeat containing 15	U	1.29845	Yes
FOS	V-fos FBJ murine osteosarcoma viral oncogene homolog	U	1.29789	Yes	orange
TST	Thiosulfate sulfurtransferase (rhodanese)	U	1.2968	Yes	orange
HIST1H4D	Histone 1, H4d	U	1.29612	Yes
COL7A1	Collagen, type VII, alpha 1 (epidermolysis bullosa, dystrophic, dominant and recessive)	D	1.29525	Yes
CYP24A1	Cytochrome P450, family 24, subfamily A, polypeptide 1	D	1.2912	Yes
PLOD2	Procollagen-lysine, 2-oxoglutarate 5-dioxygenase (lysine hydroxylase) 2	U	1.28986	Yes	orange
CLDN4	Claudin 4	D	1.28916	Yes	gray
HOMER2	Homer homolog 2 (Drosophila)	D	1.28849	Yes	gray
AMBP	Alpha-1-microglobulin/bikunin precursor	D	1.28758	Yes
GDF10	Growth differentiation factor 10	U	1.28424	Yes	orange
FOXQ1	Forkhead box Q1	D	1.28398	Yes
RIPK4	Receptor-interacting serine-threonine kinase 4	D	1.28303	Yes	gray
CRTAC1	Cartilage acidic protein 1	D	1.28196	Yes	gray
SGK2	Serum/glucocorticoid regulated kinase 2	U	1.28088	Yes	orange
SDC1	Syndecan 1	D	1.2804	Yes	gray
CYP4F12	Cytochrome P450, family 4, subfamily F, polypeptide 12	U	1.27771	Yes
GRB14	Growth factor receptor-bound protein 14	U	1.27717	Yes	orange
GPT2	Glutamic pyruvate transaminase (alanine aminotransferase) 2	U	1.27709	Yes	orange
PDLIM3	PDZ and LIM domain 3	D	1.27312	Yes	gray
CLDN5	Claudin 5 (transmembrane protein deleted in velocardiofacial syndrome)	U	1.27292	Yes	orange
ACO1	Aconitase 1, soluble	U	1.27136	Yes	orange
MSX2	Msh homeo box homolog 2 (Drosophila)	D	1.27132	Yes	gray
CDH1	Cadherin 1, type 1, E-cadherin (epithelial)	D	1.26996	Yes	gray
XG	Xg blood group (pseudoautosomal boundary-divided on the X chromosome)	U	1.26941	Yes	orange
KRT5	Keratin 5 (epidermolysis bullosa simplex, Dowling-Meara/Kobner/Weber-Cockayne types)	D	1.26647	Yes	gray
MMP3	Matrix metalloproteinase 3 (stromelysin 1, progelatinase)	D	1.26275	Yes
RARRES2	Retinoic acid receptor responder (tazarotene induced) 2	U	1.2626	Yes	orange
POU3F3	POU domain, class 3, transcription factor 3	U	1.26101	Yes
F12	Coagulation factor XII (Hageman factor)	D	1.26046	Yes
DPEP2	Dipeptidase 2	U	1.25948	Yes	orange
GNG2	Guanine nucleotide binding protein (G protein), gamma 2	U	1.25922	Yes	orange
RASD1	RAS, dexamethasone-induced 1	U	1.2592	Yes	orange
GNAI1	Guanine nucleotide binding protein (G protein), alpha inhibiting activity polypeptide 1	U	1.25918	Yes	orange
RGS18	Regulator of G-protein signaling 18	U	1.25813	Yes	orange
IRF6	Interferon regulatory factor 6	D	1.25735	Yes	gray
TYRO3	TYRO3 protein tyrosine kinase	U	1.25574	Yes	orange
MDH1	Malate dehydrogenase 1, NAD (soluble)	U	1.25504	Yes	orange
PPP2R1B	Protein phosphatase 2 (formerly 2A), regulatory subunit A (PR 65), beta isoform	U	1.25422	Yes	orange
DHRS2	Dehydrogenase/reductase (SDR family) member 2	D	1.2538	Yes
NUDT11	Nudix (nucleoside diphosphate linked moiety X)-type motif 11	D	1.2534	Yes
AOX1	Aldehyde oxidase 1	U	1.25337	Yes	orange
CDH3	Cadherin 3, type 1, P-cadherin (placental)	D	1.25242	Yes	gray
BMX	BMX non-receptor tyrosine kinase	U	1.25225	Yes
RASEF	RAS and EF hand domain containing	D	1.25103	Yes	gray
RDH12	Retinol dehydrogenase 12 (all-trans and 9-cis)	U	1.25092	Yes
EPHA3	EPH receptor A3	U	1.24936	Yes	orange
CD1C	CD1C antigen, c polypeptide	U	1.24888	Yes	orange
DMRT2	Doublesex and mab-3 related transcription factor 2	U	1.24664	Yes	orange
SFRP2	Secreted frizzled-related protein 2	U	1.24612	Yes	orange
EMP1	Epithelial membrane protein 1	U	1.24529	Yes	orange
HBZ	Hemoglobin, zeta	D	1.24489	Yes
BTNL8	Butyrophilin-like 8	U	1.24381	Yes	orange
POSTN	Periostin, osteoblast specific factor	D	1.2432	Yes
STMN2	Stathmin-like 2	U	1.2429	Yes
SUSD3	Sushi domain containing 3	D	1.24129	Yes	gray
SLC35F3	Solute carrier family 35, member F3	D	1.24103	Yes	gray
ID1	Inhibitor of DNA binding 1, dominant negative helix-loop-helix protein	U	1.24075	Yes	orange
DUSP9	Dual specificity phosphatase 9	D	1.23875	Yes
ADRA1B	Adrenergic, alpha-1B-, receptor	U	1.23668	Yes	orange
SPINT2	Serine protease inhibitor, Kunitz type, 2	D	1.23546	Yes	gray
KLK10	Kallikrein 10	D	1.23516	Yes	gray
PTPRT	Protein tyrosine phosphatase, receptor type, T	D	1.2351	Yes	gray
GPR146	G protein-coupled receptor 146	U	1.23472	Yes	orange
RGS2	Regulator of G-protein signalling 2, 24kDa	D	1.2331	Yes
TK1	Thymidine kinase 1, soluble	D	1.23258	Yes
NCF1	Neutrophil cytosolic factor 1 (47kDa, chronic granulomatous disease, autosomal 1)	U	1.23215	Yes	orange
PHLDA1	Pleckstrin homology-like domain, family A, member 1	D	1.2298	Yes	gray
FCGR2A	Fc fragment of IgG, low affinity IIa, receptor for (CD32)	U	1.2295	Yes	orange
ATOH8	Atonal homolog 8 (Drosophila)	U	1.22871	Yes	orange
FAP	Fibroblast activation protein, alpha	U	1.22688	Yes	orange
FJX1	Four jointed box 1 (Drosophila)	D	1.22662	Yes	gray
SORT1	Sortilin 1	U	1.22648	Yes	orange
AK5	Adenylate kinase 5	D	1.22641	Yes	gray
DUSP2	Dual specificity phosphatase 2	D	1.22595	Yes
IRX3	Iroquois homeobox protein 3	D	1.2258	Yes	gray
COLEC11	Collectin sub-family member 11	U	1.22553	Yes	orange
BOK	BCL2-related ovarian killer	U	1.22498	Yes	orange
NR1D1	Nuclear receptor subfamily 1, group D, member 1	U	1.22483	Yes
CST3	Cystatin C (amyloid angiopathy and cerebral hemorrhage)	U	1.22394	Yes	orange
DPYSL4	Dihydropyrimidinase-like 4	D	1.22327	Yes
GSTM5	Glutathione S-transferase M5	U	1.22327	Yes	orange
MYOM1	Myomesin 1 (skelemin) 185kDa	U	1.22228	Yes	orange
CRYM	Crystallin, mu	D	1.22187	Yes
SDK2	Sidekick homolog 2 (chicken)	D	1.2216	Yes	gray
CD163	CD163 antigen	U	1.22012	Yes	orange
MS4A6A	Membrane-spanning 4-domains, subfamily A, member 6A	U	1.21899	Yes	orange
TUBB3	Tubulin, beta 3	D	1.21734	Yes
SIK2	Salt-inducible serine/threonine kinase 2	U	1.21512	Yes	orange
F10	Coagulation factor X	U	1.21419	Yes	orange
KCNJ15	Potassium inwardly-rectifying channel, subfamily J, member 15	U	1.21337	Yes
LAMC3	Laminin, gamma 3	D	1.21275	Yes
C3orf14	Chromosome 3 open reading frame 14	D	1.21196	Yes	gray
UPP1	Uridine phosphorylase 1	U	1.20956	Yes
ZNF177	Zinc finger protein 177	D	1.20867	Yes
IFI27	Interferon, alpha-inducible protein 27	U	1.20751	Yes
TM7SF2	Transmembrane 7 superfamily member 2	U	1.20696	Yes	orange
GPR4	G protein-coupled receptor 4	U	1.20565	Yes	orange
WNT10A	Wingless-type MMTV integration site family, member 10A	D	1.20435	Yes
FBN1	Fibrillin 1 (Marfan syndrome)	U	1.20083	Yes	orange
HOXA10	Homeo box A10	U	1.20032	Yes	orange
TMC4	Transmembrane channel-like 4	D	1.19965	Yes	gray
DOCK11	Dedicator of cytokinesis 11	U	1.19957	Yes	orange
FGF18	Fibroblast growth factor 18	U	1.19899	Yes	orange
FSTL3	Follistatin-like 3 (secreted glycoprotein)	U	1.19752	Yes	orange
TEK	TEK tyrosine kinase, endothelial (venous malformations, multiple cutaneous and mucosal)	U	1.19709	Yes	orange
CYP39A1	Cytochrome P450, family 39, subfamily A, polypeptide 1	D	1.1963	Yes
BANK1	B-cell scaffold protein with ankyrin repeats 1	U	1.19526	Yes	orange
SPATA9	Spermatogenesis associated 9	U	1.19454	Yes	orange
SDPR	Serum deprivation response (phosphatidylserine binding protein)	U	1.19389	Yes	orange
GJA4	Gap junction protein, alpha 4, 37kDa (connexin 37)	U	1.1938	Yes	orange
GSN	Gelsolin (amyloidosis, Finnish type)	U	1.19295	Yes	orange
TYMS	Thymidylate synthetase	D	1.19265	Yes
DACT2	Dapper homolog 2, antagonist of beta-catenin (xenopus)	D	1.19206	Yes
ANGPTL4	Angiopoietin-like 4	U	1.19162	Yes	orange
TGFA	Transforming growth factor, alpha	D	1.19129	Yes
CNTFR	Ciliary neurotrophic factor receptor	U	1.19047	Yes	orange
HSDL2	Hydroxysteroid dehydrogenase like 2	U	1.18901	Yes	orange
GHR	Growth hormone receptor	U	1.18771	Yes	orange
TCEAL7	Transcription elongation factor A (SII)-like 7	D	1.18739	Yes
CD33	CD33 antigen (gp67)	U	1.18736	Yes	orange
ANGPTL2	Angiopoietin-like 2	U	1.18638	Yes	orange
VAV3	Vav 3 oncogene	D	1.18455	Yes	gray
COL1A1	Collagen, type I, alpha 1	U	1.18449	Yes	orange
GAL	Galanin	D	1.18265	Yes
COCH	Coagulation factor C homolog, cochlin (Limulus polyphemus)	U	1.18256	Yes	orange
ECM1	Extracellular matrix protein 1	U	1.18208	Yes	orange
SLC2A4	Solute carrier family 2 (facilitated glucose transporter), member 4	U	1.1802	Yes	orange
ITSN1	Intersectin 1 (SH3 domain protein)	U	1.17868	Yes	orange
SLC6A14	Solute carrier family 6 (neurotransmitter transporter), member 14	D	1.17817	Yes	gray
FTL	Ferritin, light polypeptide	U	1.17729	Yes	orange
SCNN1A	Sodium channel, nonvoltage-gated 1 alpha	D	1.17664	Yes	gray
GFRA2	GDNF family receptor alpha 2	U	1.17609	Yes	orange
ABCC3	ATP-binding cassette, sub-family C (CFTR/MRP), member 3	D	1.17572	Yes	gray
GSTT1	Glutathione S-transferase theta 1	U	1.17485	Yes
HMOX1	Heme oxygenase (decycling) 1	U	1.17441	Yes	orange
TRIM9	Tripartite motif-containing 9	D	1.17435	Yes
NCALD	Neurocalcin delta	D	1.17405	Yes
DCN	Decorin	U	1.17296	Yes
XCL2	Chemokine (C motif) ligand 2	D	1.17146	Yes
CDCA3	Cell division cycle associated 3	D	1.17044	Yes
S100A10	S100 calcium binding protein A10 (annexin II ligand, calpactin I, light polypeptide (p11))	U	1.16968	Yes	orange
TNFRSF11B	Tumor necrosis factor receptor superfamily, member 11b (osteoprotegerin)	D	1.16937	Yes
KCNK15	Potassium channel, subfamily K, member 15	U	1.16734	Yes
DIO3	Deiodinase, iodothyronine, type III	U	1.16686	Yes	orange
TBX21	T-box 21	D	1.16676	Yes
TRIM36	Tripartite motif-containing 36	D	1.16669	Yes	gray
ZNF165	Zinc finger protein 165	D	1.16646	Yes	gray
EPS8L1	EPS8-like 1	D	1.16604	Yes	gray
ECM2	Extracellular matrix protein 2, female organ and adipocyte specific	U	1.16521	Yes	orange
RHOV	Ras homolog gene family, member V	D	1.16452	Yes	gray
CDH5	Cadherin 5, type 2, VE-cadherin (vascular epithelium)	U	1.16446	Yes
FOLH1	Folate hydrolase (prostate-specific membrane antigen) 1	D	1.1642	Yes	gray
MEST	Mesoderm specific transcript homolog (mouse)	U	1.16379	Yes	orange
NCF4	Neutrophil cytosolic factor 4, 40kDa	U	1.16287	Yes	orange
LAMA1	Laminin, alpha 1	D	1.16154	Yes	gray
CD24	CD24 antigen (small cell lung carcinoma cluster 4 antigen)	D	1.15895	Yes	gray
CFH	Complement factor H	U	1.15786	Yes	orange
STS	Steroid sulfatase (microsomal), arylsulfatase C, isozyme S	U	1.15771	Yes	orange
SLC12A2	Solute carrier family 12 (sodium/potassium/chloride transporters), member 2	D	1.15759	Yes	gray
MMP23B	Matrix metalloproteinase 23B	U	1.15619	Yes	orange
RAMP2	Receptor (calcitonin) activity modifying protein 2	U	1.15549	Yes
LIPH	Lipase, member H	D	1.15493	Yes	gray
CLDN1	Claudin 1	D	1.15438	Yes	gray
COL3A1	Collagen, type III, alpha 1 (Ehlers-Danlos syndrome type IV, autosomal dominant)	U	1.15395	Yes	orange
SNX10	Sorting nexin 10	U	1.15219	Yes	orange
KRT14	Keratin 14 (epidermolysis bullosa simplex, Dowling-Meara, Koebner)	D	1.15188	Yes	gray
IRF4	Interferon regulatory factor 4	U	1.15184	Yes
GREM2	Gremlin 2 homolog, cysteine knot superfamily (Xenopus laevis)	D	1.15143	Yes	orange
CALCRL	Calcitonin receptor-like	U	1.15011	Yes	orange
PROX1	Prospero-related homeobox 1	D	1.14929	Yes
MLPH	Melanophilin	D	1.1492	Yes	gray
ZBED2	Zinc finger, BED domain containing 2	U	1.14876	Yes
MT1E	Metallothionein 1E (functional)	D	1.14864	Yes
EPHB1	EPH receptor B1	D	1.14796	Yes
YWHAG	Tyrosine 3-monooxygenase/tryptophan 5-monooxygenase activation protein, gamma polypeptide	U	1.1474	Yes	orange
SCUBE2	Signal peptide, CUB domain, EGF-like 2	D	1.14716	Yes	gray
TNFRSF4	Tumor necrosis factor receptor superfamily, member 4	U	1.14659	Yes	orange
AKAP12	A kinase (PRKA) anchor protein (gravin) 12	U	1.14558	Yes	orange
PLA2G7	Phospholipase A2, group VII (platelet-activating factor acetylhydrolase, plasma)	D	1.14557	Yes
CHST13	Carbohydrate (chondroitin 4) sulfotransferase 13	U	1.14522	Yes
KCNJ8	Potassium inwardly-rectifying channel, subfamily J, member 8	U	1.14507	Yes	orange
GAS2	Growth arrest-specific 2	D	1.14469	Yes	gray
SYTL1	Synaptotagmin-like 1	D	1.14459	Yes	gray
FADS2	Fatty acid desaturase 2	U	1.1433	Yes	orange
VKORC1L1	Vitamin K epoxide reductase complex, subunit 1-like 1	U	1.14239	Yes	orange
VSNL1	Visinin-like 1	D	1.14224	Yes	gray
SERPINF1	Serine (or cysteine) proteinase inhibitor, clade F (alpha-2 antiplasmin, pigment epithelium derived factor), member 1	U	1.13978	Yes	orange
MPEG1	Macrophage expressed gene 1	U	1.13962	Yes	orange
SCIN	Scinderin	U	1.1392	Yes
GLUL	Glutamate-ammonia ligase (glutamine synthase)	U	1.13911	Yes
PLEK	Pleckstrin	U	1.13905	Yes	orange
UGP2	UDP-glucose pyrophosphorylase 2	U	1.13831	Yes	orange
CSF3	Colony stimulating factor 3 (granulocyte)	U	1.1375	Yes
CSTA	Cystatin A (stefin A)	U	1.13714	Yes
NAALAD2	N-acetylated alpha-linked acidic dipeptidase 2	U	1.13672	Yes	orange
BMPER	BMP-binding endothelial regulator precursor protein	U	1.13629	Yes	orange
COL4A2	Collagen, type IV, alpha 2	U	1.1345	Yes	orange
KCNE1	Potassium voltage-gated channel, Isk-related family, member 1	D	1.13412	Yes	gray
CD2	CD2 antigen (p50), sheep red blood cell receptor	D	1.13345	Yes
BAMBI	BMP and activin membrane-bound inhibitor homolog (Xenopus laevis)	D	1.13238	Yes	gray
DLX3	Distal-less homeo box 3	U	1.13214	Yes
CYBB	Cytochrome b-245, beta polypeptide (chronic granulomatous disease)	U	1.13135	Yes	orange
C4BPA	Complement component 4 binding protein, alpha	D	1.13089	Yes	gray
TNNT3	Troponin T3, skeletal, fast	U	1.1296	Yes
MEOX2	Mesenchyme homeo box 2 (growth arrest-specific homeo box)	U	1.12947	Yes	orange
SLC4A11	Solute carrier family 4, sodium bicarbonate transporter-like, member 11	D	1.12934	Yes	gray
NINJ2	Ninjurin 2	U	1.12902	Yes
PHLDB2	Pleckstrin homology-like domain, family B, member 2	U	1.12901	Yes	orange
APLN	Apelin, AGTRL1 ligand	D	1.12891	Yes
CAMK2B	Calcium/calmodulin-dependent protein kinase (CaM kinase) II beta	D	1.12869	Yes	gray
ROR2	Receptor tyrosine kinase-like orphan receptor 2	D	1.12795	Yes	gray
SLC38A5	Solute carrier family 38, member 5	D	1.12793	Yes
PFKFB3	6-phosphofructo-2-kinase/fructose-2,6-biphosphatase 3	U	1.12759	Yes	orange
CCR2	Chemokine (C-C motif) receptor 2	D	1.12684	Yes
BMP5	Bone morphogenetic protein 5	U	1.12623	Yes
ADAMTS16	A disintegrin-like and metalloprotease (reprolysin type) with thrombospondin type 1 motif, 16	U	1.12618	Yes	orange
IRX5	Iroquois homeobox protein 5	D	1.1256	Yes	gray
ELN	Elastin (supravalvular aortic stenosis, Williams-Beuren syndrome)	U	1.12492	Yes	orange
KLHL13	Kelch-like 13 (Drosophila)	D	1.12484	Yes	gray
NCR1	Natural cytotoxicity triggering receptor 1	U	1.12428	Yes	orange
TNF	Tumor necrosis factor (TNF superfamily, member 2)	U	1.12427	Yes	orange
MT1X	Metallothionein 1X	U	1.12393	Yes
RNF128	Ring finger protein 128	D	1.12344	Yes	gray
STAB2	Stabilin 2	D	1.1233	Yes	gray
SIX6	Sine oculis homeobox homolog 6 (Drosophila)	D	1.12253	Yes
PYGM	Phosphorylase, glycogen; muscle (McArdle syndrome, glycogen storage disease type V)	U	1.12237	Yes	orange
DCDC2	Doublecortin domain containing 2	D	1.12134	Yes	gray
LGI4	Leucine-rich repeat LGI family, member 4	U	1.12057	Yes
ALDH1A1	Aldehyde dehydrogenase 1 family, member A1	U	1.11971	Yes	orange
FGR	Gardner-Rasheed feline sarcoma viral (v-fgr) oncogene homolog	U	1.11856	Yes	orange
PTX3	Pentaxin-related gene, rapidly induced by IL-1 beta	U	1.11695	Yes
AGTR1	Angiotensin II receptor, type 1	U	1.11438	Yes	orange
ESAM	Endothelial cell adhesion molecule	U	1.11362	Yes	orange
EPHA1	EPH receptor A1	D	1.11348	Yes	gray
NEUROG2	Neurogenin 2	D	1.1127	Yes	gray
CAV2	Caveolin 2	U	1.10873	Yes	orange
STAC2	SH3 and cysteine rich domain 2	D	1.10849	Yes	gray
PAX8	Paired box gene 8	U	1.10788	Yes
C1QTNF7	C1q and tumor necrosis factor related protein 7	U	1.10722	Yes	orange
CPVL	Carboxypeptidase, vitellogenic-like	U	1.10705	Yes	orange
FOXF1	Forkhead box F1	U	1.10698	Yes
CTHRC1	Collagen triple helix repeat containing 1	U	1.10621	Yes	orange
MAPK4	Mitogen-activated protein kinase 4	D	1.10545	Yes
SUCNR1	Succinate receptor 1	U	1.10475	Yes	orange
EPN3	Epsin 3	D	1.10422	Yes	gray
STX11	Syntaxin 11	U	1.10372	Yes	orange
NQO2	NAD(P)H dehydrogenase, quinone 2	U	1.10348	Yes	orange
ABCA8	ATP-binding cassette, sub-family A (ABC1), member 8	U	1.10277	Yes
COL14A1	Collagen, type XIV, alpha 1 (undulin)	U	1.10183	Yes	orange
CTSK	Cathepsin K (pycnodysostosis)	U	1.10176	Yes	orange
ASAH1	N-acylsphingosine amidohydrolase (acid ceramidase) 1	U	1.10043	Yes	orange
C3AR1	Complement component 3a receptor 1	U	1.10038	Yes	orange
CCRL2	Chemokine (C-C motif) receptor-like 2	U	1.09985	Yes	orange
SRPX2	Sushi-repeat-containing protein, X-linked 2	U	1.0994	Yes	orange
EMCN	Endomucin	U	1.09905	Yes	orange
ETV4	Ets variant gene 4 (E1A enhancer binding protein, E1AF)	D	1.09893	Yes
LY9	Lymphocyte antigen 9	D	1.09829	Yes
BIRC5	Baculoviral IAP repeat-containing 5 (survivin)	D	1.09742	Yes
GYPC	Glycophorin C (Gerbich blood group)	U	1.0973	Yes	orange
IL17D	Interleukin 17D	U	1.09681	Yes	orange
C1QTNF5	C1q and tumor necrosis factor related protein 5	U	1.09608	Yes	orange
GBE1	Glucan (1,4-alpha-), branching enzyme 1 (glycogen branching enzyme, Andersen disease, glycogen storage disease type IV)	U	1.09492	Yes	orange
GSTA1	Glutathione S-transferase A1	D	1.09422	Yes	gray
PRKCZ	Protein kinase C, zeta	D	1.09408	Yes	gray
PDGFRL	Platelet-derived growth factor receptor-like	U	1.09404	Yes	orange
THAP10	THAP domain containing 10	D	1.09329	Yes
PDE8B	Phosphodiesterase 8B	U	1.09184	Yes	orange
PALM	Paralemmin	U	1.09157	Yes	orange
HCK	Hemopoietic cell kinase	U	1.09133	Yes	orange
NETO2	Neuropilin (NRP) and tolloid (TLL)-like 2	D	1.09126	Yes
PDE2A	Phosphodiesterase 2A, cGMP-stimulated	U	1.09116	Yes	orange
CA9	Carbonic anhydrase IX	D	1.09081	Yes
CTSL	Cathepsin L	U	1.09007	Yes
COL1A2	Collagen, type I, alpha 2	U	1.08992	Yes	orange
APOA1	Apolipoprotein A-I	D	1.08576	Yes
DIO2	Deiodinase, iodothyronine, type II	D	1.08544	Yes
SPON1	Spondin 1, extracellular matrix protein	U	1.08542	Yes	orange
HOXB6	Homeo box B6	U	1.08425	Yes	orange
HDC	Histidine decarboxylase	U	1.0837	Yes	orange
IDH1	Isocitrate dehydrogenase 1 (NADP+), soluble	U	1.08332	Yes	orange
BST1	Bone marrow stromal cell antigen 1	U	1.08323	Yes	orange
COL2A1	Collagen, type II, alpha 1 (primary osteoarthritis, spondyloepiphyseal dysplasia, congenital)	D	1.08318	Yes
PEPD	Peptidase D	U	1.08297	Yes	orange
PLEK2	Pleckstrin 2	D	1.08209	Yes	gray
LMCD1	LIM and cysteine-rich domains 1	U	1.08097	Yes	orange
PTGIS	Prostaglandin I2 (prostacyclin) synthase	U	1.08039	Yes	orange
ILDR1	Immunoglobulin-like domain containing receptor 1	D	1.07938	Yes
MARVELD2	MARVEL domain containing 2	D	1.07838	Yes	gray
GFAP	Glial fibrillary acidic protein	D	1.0775	Yes
NOG	Noggin	D	1.07729	Yes
ELOVL5	ELOVL family member 5, elongation of long chain fatty acids (FEN1/Elo2, SUR4/Elo3-like, yeast)	U	1.07699	Yes	orange
ADAMTS8	A disintegrin-like and metalloprotease (reprolysin type) with thrombospondin type 1 motif, 8	D	1.07661	Yes
ETV6	Ets variant gene 6 (TEL oncogene)	D	1.07451	Yes
GPNMB	Glycoprotein (transmembrane) nmb	U	1.07424	Yes	orange
USP43	Ubiquitin specific protease 43	D	1.07271	Yes	gray
CCR5	Chemokine (C-C motif) receptor 5	D	1.07213	Yes
CA14	Carbonic anhydrase XIV	D	1.07097	Yes
CHDH	Choline dehydrogenase	D	1.07067	Yes	gray
CNIH3	Cornichon homolog 3 (Drosophila)	D	1.07041	Yes
CTNND2	Catenin (cadherin-associated protein), delta 2 (neural plakophilin-related arm-repeat protein)	D	1.07029	Yes	gray
LRRN1	Leucine rich repeat neuronal 1	D	1.07019	Yes	gray
CRHR2	Corticotropin releasing hormone receptor 2	U	1.0689	Yes
ABCC11	ATP-binding cassette, sub-family C (CFTR/MRP), member 11	D	1.06872	Yes
GPM6B	Glycoprotein M6B	D	1.06861	Yes	gray
GRIK5	Glutamate receptor, ionotropic, kainate 5	D	1.06845	Yes
LGALS2	Lectin, galactoside-binding, soluble, 2 (galectin 2)	D	1.06838	Yes
FKBP5	FK506 binding protein 5	U	1.06753	Yes	orange
DERL3	Der1-like domain family, member 3	D	1.06651	Yes
C10orf10	Chromosome 10 open reading frame 10	U	1.06651	Yes	orange
NRN1	Neuritin 1	U	1.06644	Yes	orange
CNR1	Cannabinoid receptor 1 (brain)	U	1.06631	Yes	orange
MYBL2	V-myb myeloblastosis viral oncogene homolog (avian)-like 2	D	1.06615	Yes
APOA2	Apolipoprotein A-II	D	1.06522	Yes
TSLP	Thymic stromal lymphopoietin	U	1.06507	Yes
HIST1H3D	Histone 1, H3d	D	1.064	Yes
ADRB2	Adrenergic, beta-2-, receptor, surface	U	1.06301	Yes	orange
MESP1	Mesoderm posterior 1	U	1.06284	Yes	orange
VIT	Vitrin	U	1.06206	Yes	orange
UGT2B15	UDP glycosyltransferase 2 family, polypeptide B15	D	1.06172	Yes
PITX2	Paired-like homeodomain transcription factor 2	U	1.06163	Yes	orange
KIAA1804	Mixed lineage kinase 4	D	1.05963	Yes	gray
LAMA4	Laminin, alpha 4	U	1.05894	Yes	orange
LOX	Lysyl oxidase	U	1.05876	Yes	orange
AADAC	Arylacetamide deacetylase (esterase)	U	1.05789	Yes	orange
DOK1	Docking protein 1, 62kDa (downstream of tyrosine kinase 1)	U	1.05643	Yes	orange
DDX43	DEAD (Asp-Glu-Ala-Asp) box polypeptide 43	U	1.05631	Yes	orange
TWIST1	Twist homolog 1 (acrocephalosyndactyly 3; Saethre-Chotzen syndrome) (Drosophila)	U	1.05581	Yes	orange
GMNN	Geminin, DNA replication inhibitor	D	1.0558	Yes	gray
PRELP	Proline arginine-rich end leucine-rich repeat protein	U	1.0542	Yes	orange
IRF8	Interferon regulatory factor 8	U	1.05392	Yes	orange
ADH1C	Alcohol dehydrogenase 1C (class I), gamma polypeptide	U	1.0535	Yes	orange
SPTBN1	Spectrin, beta, non-erythrocytic 1	U	1.05334	Yes	orange
RILP	Rab interacting lysosomal protein	U	1.0533	Yes	orange
CD28	CD28 antigen (Tp44)	U	1.05284	Yes	orange
NMUR1	Neuromedin U receptor 1	U	1.05251	Yes	orange
OCA2	Oculocutaneous albinism II (pink-eye dilution homolog, mouse)	D	1.05137	Yes	gray
IFI44L	Interferon-induced protein 44	U	1.0498	Yes	orange
PTPRZ1	Protein tyrosine phosphatase, receptor-type, Z polypeptide 1	D	1.04967	Yes	gray
IGSF9	Immunoglobulin superfamily, member 9	D	1.04743	Yes	gray
FBXL16	F-box and leucine-rich repeat protein 16	D	1.04715	Yes	gray
RASGEF1A	RasGEF domain family, member 1A	D	1.04675	Yes	gray
VEGFB	Vascular endothelial growth factor B	U	1.04655	Yes	orange
LEF1	Lymphoid enhancer-binding factor 1	D	1.04654	Yes
ACADS	Acyl-Coenzyme A dehydrogenase, C-2 to C-3 short chain	U	1.04615	Yes	orange
DMGDH	Dimethylglycine dehydrogenase	U	1.04565	Yes	orange
CLIC6	Chloride intracellular channel 6	D	1.04513	Yes
EPB41L4B	Erythrocyte membrane protein band 4.1 like 4B	U	1.0448	Yes	orange
KLRC3	Killer cell lectin-like receptor subfamily C, member 2	D	1.04439	Yes	gray
CX3CL1	Chemokine (C-X3-C motif) ligand 1	D	1.04427	Yes	gray
SERPINI1	Serine (or cysteine) proteinase inhibitor, clade I (neuroserpin), member 1	D	1.04417	Yes
SPOCD1	SPOC domain containing 1	D	1.0441	Yes
HOOK1	Hook homolog 1 (Drosophila)	D	1.04378	Yes
ADAM12	A disintegrin and metalloproteinase domain 12 (meltrin alpha)	U	1.04365	Yes	orange
CD14	CD14 antigen	U	1.04293	Yes	orange
BRI3BP	BRI3 binding protein	D	1.04243	Yes
KCNH2	Potassium voltage-gated channel, subfamily H (eag-related), member 2	D	1.0424	Yes
TACC1	Transforming, acidic coiled-coil containing protein 1	U	1.04238	Yes	orange
TRAF4	TNF receptor-associated factor 4	D	1.04204	Yes	gray
LHX6	LIM homeobox 6	U	1.04155	Yes	orange
CNN1	Calponin 1, basic, smooth muscle	D	1.04069	Yes	gray
DUSP1	Dual specificity phosphatase 1	U	1.04058	Yes	orange
MUC15	Mucin 15	D	1.03988	Yes	gray
RGS16	Regulator of G-protein signalling 16	U	1.0398	Yes	orange
ASPH	Aspartate beta-hydroxylase	U	1.0397	Yes	orange
GPC3	Glypican 3	U	1.0395	Yes	orange
SLC25A18	Solute carrier family 25 (mitochondrial carrier), member 18	U	1.03815	Yes	orange
MYL4	Myosin, light polypeptide 4, alkali; atrial, embryonic	U	1.0373	Yes
FBP1	Fructose-1,6-bisphosphatase 1	D	1.03582	Yes
MADCAM1	Mucosal vascular addressin cell adhesion molecule 1	U	1.03549	Yes
PHOX2A	Paired-like (aristaless) homeobox 2a	U	1.03503	Yes
BDKRB2	Bradykinin receptor B2	U	1.03463	Yes	orange
EHD2	EH-domain containing 2	U	1.03396	Yes	orange
LRRC17	Leucine rich repeat containing 17	U	1.03326	Yes	orange
RAMP3	Receptor (calcitonin) activity modifying protein 3	U	1.03302	Yes	orange
BLNK	B-cell linker	D	1.03236	Yes
NCF2	Neutrophil cytosolic factor 2 (65kDa, chronic granulomatous disease, autosomal 2)	U	1.03189	Yes	orange
HSD11B2	Hydroxysteroid (11-beta) dehydrogenase 2	D	1.03164	Yes	gray
LIPG	Lipase, endothelial	D	1.03159	Yes
RNASE4	Angiogenin, ribonuclease, RNase A family, 5	U	1.03079	Yes	orange
SYCP2	Synaptonemal complex protein 2	D	1.02775	Yes	gray
FMO3	Flavin containing monooxygenase 3	U	1.0272	Yes	orange
STYK1	Protein kinase STYK1	D	1.02677	Yes	gray
PIM2	Pim-2 oncogene	D	1.02625	Yes
IL9R	Interleukin 9 receptor	D	1.02599	Yes
TNFRSF12A	Tumor necrosis factor receptor superfamily, member 12A	D	1.02556	Yes
TWIST2	Twist homolog 2 (Drosophila)	U	1.0255	Yes	orange
CLUL1	Clusterin-like 1 (retinal)	D	1.0239	Yes	gray
CD79B	CD79B antigen (immunoglobulin-associated beta)	U	1.02297	Yes	orange
OVOL1	Ovo-like 1(Drosophila)	D	1.02268	Yes	gray
DTX1	Deltex homolog 1 (Drosophila)	U	1.02113	Yes	orange
GCNT2	Glucosaminyl (N-acetyl) transferase 2, I-branching enzyme	D	1.02111	Yes	gray
CXCR3	Chemokine (C-X-C motif) receptor 3	D	1.01959	Yes
DDR1	Discoidin domain receptor family, member 1	D	1.01892	Yes	gray
SPARCL1	SPARC-like 1 (mast9, hevin)	U	1.01789	Yes
GLDC	Glycine dehydrogenase (decarboxylating; glycine decarboxylase, glycine cleavage system protein P)	D	1.01789	Yes
HAMP	Hepcidin antimicrobial peptide	D	1.01729	Yes
ASF1B	ASF1 anti-silencing function 1 homolog B (S. cerevisiae)	D	1.01721	Yes
FBLN1	Fibulin 1	U	1.01667	Yes	orange
TAL1	T-cell acute lymphocytic leukemia 1	U	1.01578	Yes	orange
DPP4	Dipeptidylpeptidase 4 (CD26, adenosine deaminase complexing protein 2)	U	1.01568	Yes	orange
PDZK1	PDZ domain containing 1	D	1.01564	Yes	gray
PTPRS	Protein tyrosine phosphatase, receptor type, S	U	1.01488	Yes	orange
BNC1	Basonuclin 1	D	1.01341	Yes	gray
TIMP3	Tissue inhibitor of metalloproteinase 3 (Sorsby fundus dystrophy, pseudoinflammatory)	U	1.01259	Yes
HLA-DRB1	Major histocompatibility complex, class II, DR beta 4	U	1.01257	Yes	orange
CASC1	Cancer susceptibility candidate 1	D	1.01254	Yes	gray
C8orf4	Chromosome 8 open reading frame 4	D	1.01163	Yes
CA12	Carbonic anhydrase XII	D	1.01044	Yes	gray
TLR4	Toll-like receptor 4	U	1.00999	Yes	orange
EGLN3	Egl nine homolog 3 (C. elegans)	D	1.00913	Yes	gray
PTGFR	Prostaglandin F receptor (FP)	U	1.00904	Yes	orange
LAMC2	Laminin, gamma 2	D	1.00887	Yes	gray
HS3ST1	Heparan sulfate (glucosamine) 3-O-sulfotransferase 1	D	1.00764	Yes
NRP1	Neuropilin 1	U	1.0075	Yes	orange
ITIH5	Inter-alpha (globulin) inhibitor H5	U	1.00693	Yes	orange
LMNB1	Lamin B1	D	1.0069	Yes
C14orf79	Chromosome 14 open reading frame 79	D	1.00668	Yes
APBB1IP	Amyloid beta (A4) precursor protein-binding, family B, member 1 interacting protein	U	1.00642	Yes	orange
FAT2	FAT tumor suppressor homolog 2 (Drosophila)	D	1.0054	Yes	gray
CGRRF1	Cell growth regulator with ring finger domain 1	U	1.0054	Yes
AIF1	Allograft inflammatory factor 1	U	1.00527	Yes	orange
NAP1L2	Nucleosome assembly protein 1-like 2	D	1.00416	Yes	gray
COBLL1	COBL-like 1	U	1.00391	Yes	orange
PLA2G4A	Phospholipase A2, group IVA (cytosolic, calcium-dependent)	U	1.00375	Yes	orange
ITIH2	Inter-alpha (globulin) inhibitor H2	D	1.00185	Yes
PTGDR	Prostaglandin D2 receptor (DP)	U	1.00165	Yes	orange
PLTP	Phospholipid transfer protein	U	1.00049	Yes	orange
TMEM26	Transmembrane protein 26	D	1	Yes	gray
CXCL10	Chemokine (C-X-C motif) ligand 10	U	0.999786	Yes
HOXC8	Homeo box C8	U	0.998553	Yes
BNIP3L	BCL2/adenovirus E1B 19kDa interacting protein 3-like	U	0.997983	Yes	orange
CX3CR1	Chemokine (C-X3-C motif) receptor 1	D	0.997874	Yes
FCGR3A	Fc fragment of IgG, low affinity IIIb, receptor for (CD16)	U	0.996992	Yes	orange
OR51B5	Olfactory receptor, family 51, subfamily B, member 5	U	0.996375	Yes
XBP1	X-box binding protein 1	D	0.995858	Yes	gray
RARRES1	Retinoic acid receptor responder (tazarotene induced) 1	D	0.995813	Yes	gray
ABCA1	ATP-binding cassette, sub-family A (ABC1), member 1	U	0.995804	Yes	orange
IGFALS	Insulin-like growth factor binding protein, acid labile subunit	D	0.994884	Yes	gray
P4HA3	Procollagen-proline, 2-oxoglutarate 4-dioxygenase (proline 4-hydroxylase), alpha polypeptide III	U	0.994576	Yes	orange
NRXN2	Neurexin 2	D	0.993981	Yes
AP1S2	Adaptor-related protein complex 1, sigma 2 subunit	U	0.993901	Yes
FRZB	Frizzled-related protein	D	0.993626	Yes	gray
CARD14	Caspase recruitment domain family, member 14	D	0.993123	Yes	gray
CYR61	Cysteine-rich, angiogenic inducer, 61	U	0.992821	Yes	orange
CD8A	CD8 antigen, alpha polypeptide (p32)	D	0.992817	Yes
CDH13	Cadherin 13, H-cadherin (heart)	U	0.992543	Yes
PTPRC	Protein tyrosine phosphatase, receptor type, C	U	0.991876	Yes	orange
BCL11B	B-cell CLL/lymphoma 11B (zinc finger protein)	D	0.991429	Yes
TPO	Thyroid peroxidase	U	0.990835	Yes	orange
SCGN	Secretagogin, EF-hand calcium binding protein	D	0.990789	Yes
KCND2	Potassium voltage-gated channel, Shal-related subfamily, member 2	U	0.988037	Yes	orange
CFL2	Cofilin 2 (muscle)	U	0.987448	Yes	orange
ORM1	Orosomucoid 1	D	0.987317	Yes
ANK2	Ankyrin 2, neuronal	U	0.987159	Yes	orange
SCOC	Short coiled-coil protein	D	0.98707	Yes
PRDM16	PR domain containing 16	U	0.986764	Yes	orange
RPA4	Replication protein A4, 34kDa	D	0.986739	Yes
PTPRB	Protein tyrosine phosphatase, receptor type, B	U	0.986148	Yes	orange
C11orf21	Chromosome 11 open reading frame 21	U	0.983192	Yes
ABI3BP	ABI gene family, member 3 (NESH) binding protein	U	0.983068	Yes
CRYBB2	Crystallin, beta B2	D	0.982286	Yes
MYO1C	Myosin IC	U	0.982263	Yes
ELMO3	Engulfment and cell motility 3 (ced-12 homolog, C. elegans)	D	0.982197	Yes	gray
USP18	Ubiquitin specific protease 18	U	0.981946	Yes	orange
SEZ6L2	Seizure related 6 homolog (mouse)-like 2	D	0.981236	Yes
TTYH1	Tweety homolog 1 (Drosophila)	D	0.980777	Yes	gray
ALDH1A3	Aldehyde dehydrogenase 1 family, member A3	D	0.980341	Yes	gray
KCNMB2	Potassium large conductance calcium-activated channel, subfamily M, beta member 2	D	0.980022	Yes
NPL	N-acetylneuraminate pyruvate lyase (dihydrodipicolinate synthase)	U	0.979498	Yes	orange
CYP3A5	Cytochrome P450, family 3, subfamily A, polypeptide 5	U	0.979315	Yes	orange
FAM46C	Family with sequence similarity 46, member C	D	0.978484	Yes
HES7	Hairy and enhancer of split 7 (Drosophila)	U	0.978196	Yes
PROM2	Prominin 2	D	0.977399	Yes	gray
FSTL1	Follistatin-like 1	U	0.976545	Yes	orange
PHYH	Phytanoyl-CoA hydroxylase (Refsum disease)	U	0.976361	Yes	orange
HEMGN	Hemogen	D	0.976332	Yes
BUB1B	BUB1 budding uninhibited by benzimidazoles 1 homolog beta (yeast)	D	0.975858	Yes
KIAA1211	KIAA1211 protein	D	0.975614	Yes
ITGB1	Integrin, beta 1 (fibronectin receptor, beta polypeptide, antigen CD29 includes MDF2, MSK12)	U	0.97557	Yes	orange
CYP2F1	Cytochrome P450, family 2, subfamily F, polypeptide 1	U	0.975206	Yes
VCAM1	Vascular cell adhesion molecule 1	U	0.974944	Yes
IQGAP3	IQ motif containing GTPase activating protein 3	D	0.974794	Yes
PRSS3	Protease, serine, 3 (mesotrypsin)	D	0.974515	Yes
FRMD3	FERM domain containing 3	U	0.97439	Yes	orange
FOSB	FBJ murine osteosarcoma viral oncogene homolog B	U	0.974367	Yes	orange
COL5A3	Collagen, type V, alpha 3	U	0.973251	Yes	orange
RHOB	Ras homolog gene family, member B	U	0.972646	Yes
FIGF	C-fos induced growth factor (vascular endothelial growth factor D)	U	0.972605	Yes	orange
RORB	RAR-related orphan receptor B	U	0.97231	Yes	orange
CDCA5	Cell division cycle associated 5	D	0.971963	Yes
CREB3L4	CAMP responsive element binding protein 3-like 4	D	0.971133	Yes	gray
ESR1	Estrogen receptor 1	D	0.970306	Yes
IGFBP5	Insulin-like growth factor binding protein 5	U	0.969748	Yes	orange
JUNB	Jun B proto-oncogene	U	0.969101	Yes	orange
FADS1	Fatty acid desaturase 1	U	0.968755	Yes	orange
RELN	Reelin	D	0.968754	Yes
MRAS	Muscle RAS oncogene homolog	U	0.968069	Yes	orange
TNXB	Tenascin XB	U	0.966385	Yes
CGREF1	Cell growth regulator with EF hand domain 1	D	0.966286	Yes	gray
ALCAM	Activated leukocyte cell adhesion molecule	D	0.96625	Yes	gray
ENPP2	Ectonucleotide pyrophosphatase/phosphodiesterase 2 (autotaxin)	U	0.965551	Yes
CYP3A7	Cytochrome P450, family 3, subfamily A, polypeptide 7	U	0.965319	Yes	orange
PEX19	Peroxisomal biogenesis factor 19	U	0.965261	Yes	orange
LRP1	Low density lipoprotein-related protein 1 (alpha-2-macroglobulin receptor)	U	0.964653	Yes	orange
RUNX3	Runt-related transcription factor 3	D	0.964623	Yes	gray
SLIT3	Slit homolog 3 (Drosophila)	U	0.96437	Yes	orange
STXBP6	Syntaxin binding protein 6 (amisyn)	U	0.963602	Yes	orange
CLIC2	Chloride intracellular channel 2	U	0.962539	Yes
EGR3	Early growth response 3	D	0.962439	Yes	gray
CCR1	Chemokine (C-C motif) receptor 1	U	0.962238	Yes	orange
SDCBP	Syndecan binding protein (syntenin)	U	0.962192	Yes	orange
LOXL4	Lysyl oxidase-like 4	D	0.961879	Yes
NOTCH4	Notch homolog 4 (Drosophila)	U	0.961791	Yes
HIST1H1D	Histone 1, H1d	D	0.960706	Yes
CMYA5	Cardiomyopathy associated 5	D	0.960654	Yes	gray
KCTD1	Potassium channel tetramerisation domain containing 1	D	0.96024	Yes	gray
PRAP1	Proline-rich acidic protein 1	U	0.960237	Yes
CLDN7	Claudin 7	D	0.959595	Yes	gray
LGI2	Leucine-rich repeat LGI family, member 2	U	0.958466	Yes	orange
CCDC8	Coiled-coil domain containing 8	D	0.958365	Yes	gray
FBXO32	F-box protein 32	D	0.958033	Yes
SP140	SP140 nuclear body protein	D	0.9578	Yes
RHOQ	Ras homolog gene family, member Q	U	0.956676	Yes	orange
MEIS1	Meis1, myeloid ecotropic viral integration site 1 homolog (mouse)	U	0.956591	Yes
IL10RA	Interleukin 10 receptor, alpha	U	0.956514	Yes	orange
RASGRF2	Ras protein-specific guanine nucleotide-releasing factor 2	U	0.95646	Yes	orange
HIF3A	Hypoxia inducible factor 3, alpha subunit	U	0.955988	Yes	orange
NDN	Necdin homolog (mouse)	U	0.955556	Yes	orange
TPD52	Tumor protein D52	D	0.955547	Yes	gray
IL7	Interleukin 7	U	0.955438	Yes
NFKBIZ	Nuclear factor of kappa light polypeptide gene enhancer in B-cells inhibitor, zeta	U	0.95415	Yes	orange
SLC22A3	Solute carrier family 22 (extraneuronal monoamine transporter), member 3	U	0.953818	Yes	orange
CD19	CD19 antigen	D	0.953768	Yes
SLA	Src-like-adaptor	U	0.952154	Yes
HAS2	Hyaluronan synthase 2	U	0.951963	Yes	orange
CELSR1	Cadherin, EGF LAG seven-pass G-type receptor 1 (flamingo homolog, Drosophila)	D	0.950073	Yes	gray
TLN2	Talin 2	U	0.949786	Yes	orange
SMPDL3A	Sphingomyelin phosphodiesterase, acid-like 3A	U	0.949344	Yes
PCSK5	Proprotein convertase subtilisin/kexin type 5	U	0.949203	Yes	orange
DECR1	2,4-dienoyl CoA reductase 1, mitochondrial	U	0.948872	Yes	orange
KREMEN2	Kringle containing transmembrane protein 2	D	0.948543	Yes
DISP2	Dispatched homolog 2 (Drosophila)	D	0.947992	Yes
MMP2	Matrix metalloproteinase 2 (gelatinase A, 72kDa gelatinase, 72kDa type IV collagenase)	U	0.947659	Yes
RGS5	Regulator of G-protein signalling 5	U	0.946857	Yes	orange
CEACAM6	Carcinoembryonic antigen-related cell adhesion molecule 6 (non-specific cross reacting antigen)	D	0.946698	Yes
PGA5	Pepsinogen 5, group I (pepsinogen A)	U	0.946698	Yes	orange
PROS1	Protein S (alpha)	U	0.946687	Yes
SPINK5	Serine protease inhibitor, Kazal type 5	D	0.946633	Yes
CALM1	Calmodulin 1 (phosphorylase kinase, delta)	U	0.94577	Yes	orange
ZNF334	Zinc finger protein 334	D	0.944547	Yes	gray
SLC25A16	Solute carrier family 25 (mitochondrial carrier; Graves disease autoantigen), member 16	U	0.944098	Yes	orange
PERP	PERP, TP53 apoptosis effector	D	0.944043	Yes	gray
SNRK	SNF-1 related kinase	U	0.943862	Yes	orange
STARD4	START domain containing 4, sterol regulated	D	0.943154	Yes
BUB1	BUB1 budding uninhibited by benzimidazoles 1 homolog (yeast)	D	0.94298	Yes
RGS1	Regulator of G-protein signalling 1	D	0.94298	Yes	gray
TMOD1	Tropomodulin 1	U	0.942685	Yes
TBX1	T-box 1	D	0.942399	Yes	gray
CCNB2	Cyclin B2	D	0.941884	Yes
SMOC1	SPARC related modular calcium binding 1	U	0.940256	Yes
CNGA1	Cyclic nucleotide gated channel alpha 1	U	0.940125	Yes
TPX2	TPX2, microtubule-associated protein homolog (Xenopus laevis)	D	0.939669	Yes
ECH1	Enoyl Coenzyme A hydratase 1, peroxisomal	U	0.938262	Yes	orange
ARHGAP15	Rho GTPase activating protein 15	U	0.938168	Yes
PIM1	Pim-1 oncogene	U	0.938142	Yes	orange
APOD	Apolipoprotein D	U	0.937936	Yes	orange
ATP1B1	ATPase, Na+/K+ transporting, beta 1 polypeptide	D	0.937834	Yes	gray
TEF	Thyrotrophic embryonic factor	U	0.937271	Yes	orange
INADL	InaD-like protein	D	0.936669	Yes	gray
FZD7	Frizzled homolog 7 (Drosophila)	D	0.936517	Yes	gray
CLCA2	Chloride channel, calcium activated, family member 2	D	0.936294	Yes
COL27A1	Collagen, type XXVII, alpha 1	D	0.934779	Yes	gray
MAN1A1	Mannosidase, alpha, class 1A, member 1	U	0.934519	Yes	orange
FBXO2	F-box protein 2	D	0.934174	Yes	gray
CD34	CD34 antigen	U	0.933619	Yes	orange
IGSF10	Immunoglobulin superfamily, member 10	U	0.933403	Yes
CGNL1	Cingulin-like 1	D	0.932659	Yes	gray
SNAI1	Snail homolog 1 (Drosophila)	U	0.932184	Yes	orange
MFAP4	Microfibrillar-associated protein 4	U	0.931166	Yes	orange
EN1	Engrailed homolog 1	U	0.930822	Yes	orange
VIM	Vimentin	U	0.930463	Yes	orange
B4GALT6	UDP-Gal:betaGlcNAc beta 1,4- galactosyltransferase, polypeptide 6	U	0.92964	Yes	orange
C3	Complement component 3	U	0.929434	Yes	orange
NRCAM	Neuronal cell adhesion molecule	D	0.929257	Yes
CREB5	CAMP responsive element binding protein 5	U	0.928803	Yes	orange
SDS	Serine dehydratase	U	0.928529	Yes	orange
WFIKKN1	WAP, follistatin/kazal, immunoglobulin, kunitz and netrin domain containing 1	D	0.928322	Yes
COL12A1	Collagen, type XII, alpha 1	U	0.927678	Yes	orange
BCL6B	B-cell CLL/lymphoma 6, member B (zinc finger protein)	U	0.927446	Yes	orange
SEC23A	Sec23 homolog A (S. cerevisiae)	U	0.92676	Yes	orange
DOK2	Docking protein 2, 56kDa	U	0.92632	Yes	orange
F7	Coagulation factor VII (serum prothrombin conversion accelerator)	D	0.925348	Yes
GBP3	Guanylate binding protein 3	D	0.925052	Yes
CLDN6	Claudin 6	U	0.924646	Yes
CITED4	Cbp/p300-interacting transactivator, with Glu/Asp-rich carboxy-terminal domain, 4	D	0.924582	Yes	gray
HIST1H4E	Histone 1, H4e	D	0.924554	Yes
RGS9	Regulator of G-protein signalling 9	D	0.924409	Yes	gray
RHOBTB3	Rho-related BTB domain containing 3	U	0.924055	Yes	orange
KIAA0408	KIAA0408	U	0.922474	Yes	orange
HTRA3	HtrA serine peptidase 3	U	0.921136	Yes	orange
CMKLR1	Chemokine-like receptor 1	U	0.921096	Yes	orange
CD83	CD83 antigen (activated B lymphocytes, immunoglobulin superfamily)	U	0.919812	Yes	orange
EPHX1	Epoxide hydrolase 1, microsomal (xenobiotic)	U	0.917373	Yes	orange
TIMP1	Tissue inhibitor of metalloproteinase 1 (erythroid potentiating activity, collagenase inhibitor)	U	0.916408	Yes
DKK2	Dickkopf homolog 2 (Xenopus laevis)	U	0.916195	Yes	orange
CS	Citrate synthase	U	0.915459	Yes
HLA-DMA	Major histocompatibility complex, class II, DM alpha	U	0.915099	Yes	orange
CAPN9	Calpain 9	D	0.914429	Yes
AVPR2	Arginine vasopressin receptor 2 (nephrogenic diabetes insipidus)	U	0.913563	Yes	orange
NT5E	5'-nucleotidase, ecto (CD73)	U	0.912373	Yes	orange
PTGIR	Prostaglandin I2 (prostacyclin) receptor (IP)	U	0.912341	Yes	orange
MKRN3	Makorin, ring finger protein, 3	D	0.910672	Yes
SELE	Selectin E (endothelial adhesion molecule 1)	U	0.910672	Yes	orange
EFEMP1	EGF-containing fibulin-like extracellular matrix protein 1	U	0.910497	Yes
FANCA	Fanconi anemia, complementation group A	D	0.909951	Yes
LRRN3	Leucine rich repeat neuronal 3	U	0.90906	Yes	orange
BTC	Betacellulin	U	0.908877	Yes
ITGAM	Integrin, alpha M (complement component receptor 3, alpha; also known as CD11b (p170), macrophage antigen alpha polypeptide)	U	0.908136	Yes	orange
UGT8	UDP glycosyltransferase 8 (UDP-galactose ceramide galactosyltransferase)	D	0.907467	Yes	gray
HS6ST2	Heparan sulfate 6-O-sulfotransferase 2	D	0.906875	Yes	gray
AVPI1	Arginine vasopressin-induced 1	U	0.906772	Yes	orange
CARD9	Caspase recruitment domain family, member 9	U	0.906575	Yes
EPB41L3	Erythrocyte membrane protein band 4.1-like 3	U	0.906196	Yes	orange
MTL5	Metallothionein-like 5, testis-specific (tesmin)	D	0.903888	Yes	gray
COL13A1	Collagen, type XIII, alpha 1	D	0.903266	Yes
GDA	Guanine deaminase	D	0.902977	Yes
FAM43B	Family with sequence similarity 43, member B	U	0.902792	Yes	orange
KLF9	Kruppel-like factor 9	U	0.902108	Yes	orange
RGS17	Regulator of G-protein signaling 17	U	0.902037	Yes	orange
ZFP37	Zinc finger protein 37 homolog (mouse)	D	0.900823	Yes
ECHDC1	Enoyl Coenzyme A hydratase domain containing 1	U	0.900699	Yes	orange
COL4A6	Collagen, type IV, alpha 6	D	0.900122	Yes	gray
ITGB2	Integrin, beta 2 (antigen CD18 (p95), lymphocyte function-associated antigen 1; macrophage antigen 1 (mac-1) beta subunit)	U	0.899858	Yes	orange
KLF4	Kruppel-like factor 4 (gut)	U	0.899473	Yes
PSMB9	Proteasome (prosome, macropain) subunit, beta type, 9 (large multifunctional protease 2)	U	0.89929	Yes
GALNT3	UDP-N-acetyl-alpha-D-galactosamine:polypeptide N-acetylgalactosaminyltransferase 3 (GalNAc-T3)	D	0.898977	Yes	gray
GFRA1	GDNF family receptor alpha 1	U	0.898269	Yes
FANK1	Fibronectin type 3 and ankyrin repeat domains 1	D	0.89826	Yes	gray
ENTPD3	Ectonucleoside triphosphate diphosphohydrolase 3	U	0.897416	Yes	orange
GPM6A	Glycoprotein M6A	U	0.897144	Yes
COTL1	Coactosin-like 1 (Dictyostelium)	U	0.896931	Yes
TBX15	T-box 15	U	0.89595	Yes	orange
CDC42EP2	CDC42 effector protein (Rho GTPase binding) 2	U	0.894282	Yes	orange
MME	Membrane metallo-endopeptidase (neutral endopeptidase, enkephalinase, CALLA, CD10)	U	0.894043	Yes
ANGPT1	Angiopoietin 1	U	0.89302	Yes	orange
PCDHB5	Protocadherin beta 5	D	0.892367	Yes
CPN2	Carboxypeptidase N, polypeptide 2, 83kD	U	0.892247	Yes
CLDN19	Claudin 19	D	0.89171	Yes	gray
ANGPTL1	Angiopoietin-like 1	U	0.891274	Yes	orange
STC1	Stanniocalcin 1	U	0.89103	Yes
KIF2C	Kinesin family member 2C	D	0.890005	Yes
TCN2	Transcobalamin II; macrocytic anemia	U	0.889087	Yes
CPAMD8	C3 and PZP-like, alpha-2-macroglobulin domain containing 8	D	0.888867	Yes	gray
TLR2	Toll-like receptor 2	D	0.888136	Yes
IFI30	Interferon, gamma-inducible protein 30	U	0.886134	Yes
C19orf12	Chromosome 19 open reading frame 12	U	0.885689	Yes	orange
PDE4B	Phosphodiesterase 4B, cAMP-specific (phosphodiesterase E4 dunce homolog, Drosophila)	D	0.885128	Yes	gray
JPH2	Junctophilin 2	D	0.884562	Yes	gray
EDN1	Endothelin 1	D	0.884451	Yes
PGRMC2	Progesterone receptor membrane component 2	U	0.882615	Yes	orange
IGSF3	Immunoglobulin superfamily, member 3	D	0.881635	Yes	gray
ENPP5	Ectonucleotide pyrophosphatase/phosphodiesterase 5 (putative function)	D	0.881249	Yes	gray
HSH2D	Hematopoietic SH2 domain containing	D	0.881164	Yes
ANPEP	Alanyl (membrane) aminopeptidase (aminopeptidase N, aminopeptidase M, microsomal aminopeptidase, CD13, p150)	D	0.879465	Yes
PTRF	Polymerase I and transcript release factor	U	0.879407	Yes
DDIT4L	DNA-damage-inducible transcript 4-like	U	0.879016	Yes	orange
GADD45B	Growth arrest and DNA-damage-inducible, beta	U	0.878098	Yes	orange
ZIC2	Zic family member 2 (odd-paired homolog, Drosophila)	D	0.877708	Yes
NUSAP1	Nucleolar and spindle associated protein 1	D	0.877258	Yes
SFRP1	Secreted frizzled-related protein 1	D	0.876867	Yes	gray
FZD10	Frizzled homolog 10 (Drosophila)	D	0.876187	Yes	gray
IL18	Interleukin 18 (interferon-gamma-inducing factor)	U	0.87484	Yes
CSPG4	Chondroitin sulfate proteoglycan 4 (melanoma-associated)	U	0.874618	Yes	orange
ETV1	Ets variant gene 1	D	0.874192	Yes	gray
CDH22	Cadherin-like 22	D	0.873809	Yes	gray
ADAMTSL3	ADAMTS-like 3	U	0.873548	Yes	orange
PROC	Protein C (inactivator of coagulation factors Va and VIIIa)	D	0.873241	Yes
ADAM33	A disintegrin and metalloproteinase domain 33	U	0.873133	Yes
FBXO3	F-box protein 3	U	0.873089	Yes
TMEM35	Transmembrane protein 35	U	0.872847	Yes
SLAMF8	SLAM family member 8	U	0.872473	Yes	orange
THBD	Thrombomodulin	U	0.872051	Yes	orange
EFHD1	EF hand domain containing 1	D	0.871623	Yes	gray
CD53	CD53 antigen	U	0.871238	Yes	orange
DDX3Y	DEAD (Asp-Glu-Ala-Asp) box polypeptide 3, Y-linked	U	0.869948	Yes
ADCY5	Adenylate cyclase 5	U	0.869635	Yes	orange
SOX5	SRY (sex determining region Y)-box 5	U	0.869029	Yes	orange
BCAT1	Branched chain aminotransferase 1, cytosolic	U	0.868766	Yes	orange
TNIP1	TNFAIP3 interacting protein 1	U	0.868679	Yes	orange
AP3S2	Adaptor-related protein complex 3, sigma 2 subunit	U	0.867275	Yes
RAB31	RAB31, member RAS oncogene family	U	0.867031	Yes
PPFIA4	Protein tyrosine phosphatase, receptor type, f polypeptide (PTPRF), interacting protein (liprin), alpha 4	D	0.866564	Yes
ABCA4	ATP-binding cassette, sub-family A (ABC1), member 4	D	0.866198	Yes
AEBP1	AE binding protein 1	U	0.865924	Yes
HPGD	Hydroxyprostaglandin dehydrogenase 15-(NAD)	D	0.865915	Yes
ZFP36	Zinc finger protein 36, C3H type, homolog (mouse)	U	0.865886	Yes	orange
HMGA1	High mobility group AT-hook 1	D	0.865808	Yes
INSIG2	Insulin induced gene 2	D	0.865518	Yes
FBXO4	F-box protein 4	U	0.863702	Yes
ARNTL	Aryl hydrocarbon receptor nuclear translocator-like	D	0.863613	Yes	orange
SRPX	Sushi-repeat-containing protein, X-linked	U	0.863434	Yes
FGD5	FYVE, RhoGEF and PH domain containing 5	U	0.862939	Yes
CYBRD1	Cytochrome b reductase 1	U	0.860854	Yes
SLC1A7	Solute carrier family 1 (glutamate transporter), member 7	U	0.860844	Yes	orange
DUSP10	Dual specificity phosphatase 10	D	0.859408	Yes	gray
FGFRL1	Fibroblast growth factor receptor-like 1	U	0.858772	Yes
LAPTM5	Lysosomal associated multispanning membrane protein 5	U	0.857636	Yes	orange
KDR	Kinase insert domain receptor (a type III receptor tyrosine kinase)	U	0.857602	Yes	orange
SNTA1	Syntrophin, alpha 1 (dystrophin-associated protein A1, 59kDa, acidic component)	U	0.856787	Yes	orange
GLP2R	Glucagon-like peptide 2 receptor	U	0.856634	Yes	orange
PLXDC1	Plexin domain containing 1	D	0.856355	Yes	orange
GJB2	Gap junction protein, beta 2, 26kDa (connexin 26)	D	0.85623	Yes
SERPINA5	Serine (or cysteine) proteinase inhibitor, clade A (alpha-1 antiproteinase, antitrypsin), member 5	D	0.855683	Yes	gray
CTSC	Cathepsin C	U	0.855445	Yes
TEAD1	TEA domain family member 1 (SV40 transcriptional enhancer factor)	U	0.854921	Yes	orange
HAS3	Hyaluronan synthase 3	D	0.854706	Yes
GSG2	Haspin	D	0.854232	Yes
RIC3	RIC3 protein	D	0.854224	Yes	gray
FLI1	Friend leukemia virus integration 1	U	0.853517	Yes	orange
SCP2	Sterol carrier protein 2	U	0.852951	Yes
PGR	Progesterone receptor	D	0.851546	Yes
PPP2R5A	Protein phosphatase 2, regulatory subunit B (B56), alpha isoform	U	0.850485	Yes	orange
ALOX5	Arachidonate 5-lipoxygenase	D	0.85021	Yes	gray
TOP2A	Topoisomerase (DNA) II alpha 170kDa	D	0.849477	Yes
EGR1	Early growth response 1	D	0.84937	Yes	orange
C20orf96	Chromosome 20 open reading frame 96	D	0.849323	Yes
KCNK3	Potassium channel, subfamily K, member 3	U	0.848274	Yes
PLXND1	Plexin D1	U	0.848168	Yes
KIAA1324	Maba1	D	0.847722	Yes	gray
TDRD9	Tudor domain containing 9	D	0.84748	Yes
C1S	Complement component 1, s subcomponent	U	0.847256	Yes	orange
MLF1	Myeloid leukemia factor 1	D	0.847104	Yes
MGAT3	Mannosyl (beta-1,4-)-glycoprotein beta-1,4-N-acetylglucosaminyltransferase	U	0.846005	Yes	orange
ANK3	Ankyrin 3, node of Ranvier (ankyrin G)	D	0.845916	Yes	gray
DFNA5	Deafness, autosomal dominant 5	U	0.845303	Yes	orange
MUC4	Mucin 4, tracheobronchial	D	0.8448	Yes
GATA6	GATA binding protein 6	U	0.844751	Yes	orange
PHACTR3	Phosphatase and actin regulator 3	U	0.843967	Yes	orange
TXNIP	Thioredoxin interacting protein	U	0.842862	Yes	orange
MBD2	Methyl-CpG binding domain protein 2	D	0.842468	Yes
MEG3	Maternally expressed 3	D	0.842433	Yes
FSIP1	Fibrous sheath interacting protein 1	D	0.841969	Yes	gray
CDS1	CDP-diacylglycerol synthase (phosphatidate cytidylyltransferase) 1	D	0.841233	Yes	gray
CDC20	CDC20 cell division cycle 20 homolog (S. cerevisiae)	D	0.840859	Yes
BTD	Biotinidase	U	0.840714	Yes
CDCA7	Cell division cycle associated 7	D	0.840111	Yes
PVRL1	Poliovirus receptor-related 1 (herpesvirus entry mediator C; nectin)	D	0.839217	Yes	gray
OSCAR	Osteoclast-associated receptor	U	0.83915	Yes
KLF2	Kruppel-like factor 2 (lung)	U	0.839089	Yes	orange
MFNG	Manic fringe homolog (Drosophila)	U	0.838943	Yes	orange
SLC7A5	Solute carrier family 7 (cationic amino acid transporter, y+ system), member 5	D	0.835928	Yes
ETS1	V-ets erythroblastosis virus E26 oncogene homolog 1 (avian)	U	0.835861	Yes	orange
ARL6	ADP-ribosylation factor-like 6	U	0.835709	Yes
FYB	FYN binding protein (FYB-120/130)	D	0.83526	Yes	orange
PVRL3	Poliovirus receptor-related 3	U	0.835019	Yes
CABYR	Calcium-binding tyrosine-(Y)-phosphorylation regulated (fibrousheathin 2)	D	0.834763	Yes	gray
ARHGAP20	Rho GTPase activating protein 20	U	0.834672	Yes	orange
PFDN1	Prefoldin 1	U	0.833903	Yes
ABCG5	ATP-binding cassette, sub-family G (WHITE), member 5 (sterolin 1)	D	0.833898	Yes
TMEFF2	Transmembrane protein with EGF-like and two follistatin-like domains 2	U	0.833898	Yes
FNDC4	Fibronectin type III domain containing 4	U	0.833892	Yes	orange
SPAG8	Sperm associated antigen 8	D	0.833581	Yes	gray
SLITRK6	SLIT and NTRK-like family, member 6	D	0.833219	Yes	gray
SERPINB8	Serine (or cysteine) proteinase inhibitor, clade B (ovalbumin), member 8	U	0.832733	Yes
CDCA8	Cell division cycle associated 8	D	0.832726	Yes
HRH1	Histamine receptor H1	U	0.832356	Yes	orange
CDC25A	Cell division cycle 25A	D	0.832346	Yes
APOL6	Apolipoprotein L, 6	U	0.832303	Yes	orange
TNFAIP2	Tumor necrosis factor, alpha-induced protein 2	U	0.831165	Yes	orange
PTGS2	Prostaglandin-endoperoxide synthase 2 (prostaglandin G/H synthase and cyclooxygenase)	D	0.831069	Yes	orange
MOSPD2	Motile sperm domain containing 2	U	0.830657	Yes
PLA2G3	Phospholipase A2, group III	D	0.829811	Yes
TNFAIP8	Tumor necrosis factor, alpha-induced protein 8	U	0.829446	Yes	orange
PTPN11	Protein tyrosine phosphatase, non-receptor type 11 (Noonan syndrome 1)	U	0.828952	Yes
MEF2B	MADS box transcription enhancer factor 2, polypeptide B (myocyte enhancer factor 2B)	U	0.828942	Yes
SCRN2	Secernin 2	U	0.82872	Yes	orange
GFPT2	Glutamine-fructose-6-phosphate transaminase 2	U	0.828536	Yes	orange
ARHGEF6	Rac/Cdc42 guanine nucleotide exchange factor (GEF) 6	U	0.828154	Yes	orange
SDC2	Syndecan 2 (heparan sulfate proteoglycan 1, cell surface-associated, fibroglycan)	U	0.827992	Yes	orange
ATP8B4	ATPase, Class I, type 8B, member 4	U	0.827991	Yes	orange
CD74	CD74 antigen (invariant polypeptide of major histocompatibility complex, class II antigen-associated)	U	0.827825	Yes
C1R	Complement component 1, r subcomponent	U	0.827748	Yes	orange
SCN9A	Sodium channel, voltage-gated, type IX, alpha	U	0.827744	Yes	orange
PRRX1	Paired related homeobox 1	U	0.827575	Yes
TCF4	Transcription factor 4	U	0.82751	Yes
DCBLD1	Discoidin, CUB and LCCL domain containing 1	U	0.827124	Yes
LEPR	Leptin receptor	U	0.826958	Yes
LIF	Leukemia inhibitory factor (cholinergic differentiation factor)	D	0.82687	Yes
ZNF223	Zinc finger protein 223	D	0.826713	Yes
TNFSF13B	Tumor necrosis factor (ligand) superfamily, member 13b	U	0.82666	Yes	orange
MYO5B	Myosin VB	D	0.826403	Yes	gray
NAV1	Neuron navigator 1	U	0.82639	Yes	orange
ERBB4	V-erb-a erythroblastic leukemia viral oncogene homolog 4 (avian)	D	0.826298	Yes	gray
GFI1B	Growth factor independent 1B (potential regulator of CDKN1A, translocated in CML)	U	0.825037	Yes
PPP1R16B	Protein phosphatase 1, regulatory (inhibitor) subunit 16B	U	0.823511	Yes	orange
CDCP1	CUB domain-containing protein 1	D	0.823506	Yes	gray
DOCK2	Dedicator of cytokinesis 2	U	0.823468	Yes	orange
AQP11	Aquaporin 11	U	0.823415	Yes	orange
RCN3	Reticulocalbin 3, EF-hand calcium binding domain	U	0.823167	Yes	orange
SYTL2	Synaptotagmin-like 2	D	0.822688	Yes
LTBP1	Latent transforming growth factor beta binding protein 1	U	0.82229	Yes	orange
SERPINA11	Serine (or cysteine) proteinase inhibitor, clade A (alpha-1 antiproteinase, antitrypsin), member 11	D	0.821671	Yes
IRF5	Interferon regulatory factor 5	U	0.820793	Yes	orange
SLC40A1	Solute carrier family 40 (iron-regulated transporter), member 1	U	0.820193	Yes
HIST1H4C	Histone 1, H4c	U	0.819813	Yes
SH3RF2	SH3 domain containing ring finger 2	D	0.819543	Yes
WISP1	WNT1 inducible signaling pathway protein 1	D	0.819534	Yes
NID2	Nidogen 2 (osteonidogen)	U	0.819288	Yes	orange
CYP26A1	Cytochrome P450, family 26, subfamily A, polypeptide 1	D	0.819242	Yes	gray
COL4A5	Collagen, type IV, alpha 5 (Alport syndrome)	D	0.818916	Yes	gray
PDGFA	Platelet-derived growth factor alpha polypeptide	D	0.818696	Yes	gray
GTSE1	G-2 and S-phase expressed 1	D	0.818198	Yes
PCSK1	Proprotein convertase subtilisin/kexin type 1	U	0.817724	Yes
NXF3	Nuclear RNA export factor 3	U	0.817619	Yes
ADCY4	Adenylate cyclase 4	U	0.817106	Yes
RFX2	Regulatory factor X, 2 (influences HLA class II expression)	D	0.817071	Yes	gray
PKIB	Protein kinase (cAMP-dependent, catalytic) inhibitor beta	D	0.816915	Yes	gray
WNT5A	Wingless-type MMTV integration site family, member 5A	D	0.816881	Yes	gray
CYP3A4	Cytochrome P450, family 3, subfamily A, polypeptide 4	U	0.8164	Yes	orange
PRTFDC1	Phosphoribosyl transferase domain containing 1	U	0.816	Yes
SLC9A9	Solute carrier family 9 (sodium/hydrogen exchanger), isoform 9	U	0.815735	Yes	orange
RPS6KA5	Ribosomal protein S6 kinase, 90kDa, polypeptide 5	D	0.815599	Yes	gray
PCDHB10	Protocadherin beta 10	U	0.81558	Yes
GABRA2	Gamma-aminobutyric acid (GABA) A receptor, alpha 2	U	0.814866	Yes	orange
BMP4	Bone morphogenetic protein 4	U	0.813609	Yes
CCND1	Cyclin D1 (PRAD1: parathyroid adenomatosis 1)	U	0.812769	Yes
ESPL1	Extra spindle poles like 1 (S. cerevisiae)	D	0.811825	Yes
NAV2	Neuron navigator 2	D	0.811696	Yes
DLC1	Deleted in liver cancer 1	U	0.811588	Yes	orange
PRDX3	Peroxiredoxin 3	U	0.811423	Yes
FEM1C	Fem-1 homolog c (C.elegans)	U	0.810794	Yes
DHFR	Dihydrofolate reductase	U	0.810118	Yes	orange
NANOS1	Nanos homolog 1 (Drosophila)	U	0.809947	Yes
ADH4	Alcohol dehydrogenase 4 (class II), pi polypeptide	U	0.809581	Yes	orange
TTN	Titin	U	0.80953	Yes	orange
NAP1L1	Nucleosome assembly protein 1-like 1	D	0.809107	Yes
SOX7	SRY (sex determining region Y)-box 7	U	0.80864	Yes	orange
UHRF1	Ubiquitin-like, containing PHD and RING finger domains, 1	D	0.808035	Yes
SLC8A1	Solute carrier family 8 (sodium/calcium exchanger), member 1	U	0.807852	Yes
RECK	Reversion-inducing-cysteine-rich protein with kazal motifs	U	0.807417	Yes	orange
DCT	Dopachrome tautomerase (dopachrome delta-isomerase, tyrosine-related protein 2)	D	0.807355	Yes
ESRRG	Estrogen-related receptor gamma	D	0.807355	Yes	gray
SLC16A7	Solute carrier family 16 (monocarboxylic acid transporters), member 7	U	0.806893	Yes	orange
KIAA1683	KIAA1683	D	0.806166	Yes	gray
PSG9	Pregnancy specific beta-1-glycoprotein 9	U	0.805253	Yes
GTDC1	Glycosyltransferase-like 1	U	0.803768	Yes	orange
SAMHD1	SAM domain and HD domain 1	U	0.803559	Yes
PTGER2	Prostaglandin E receptor 2 (subtype EP2), 53kDa	U	0.802661	Yes	orange
PSAP	Prosaposin (variant Gaucher disease and variant metachromatic leukodystrophy)	U	0.801197	Yes
SPINK1	Serine protease inhibitor, Kazal type 1	D	0.801154	Yes
ENPEP	Glutamyl aminopeptidase (aminopeptidase A)	U	0.800283	Yes	orange
EDNRB	Endothelin receptor type B	U	0.800238	Yes
IER3	Immediate early response 3	D	0.80021	Yes
ADORA2B	Adenosine A2b receptor	D	0.800015	Yes	gray
TNFRSF21	Tumor necrosis factor receptor superfamily, member 21	U	0.798958	No
MT2A	Metallothionein 2A	U	0.798639	No
PKIG	Protein kinase (cAMP-dependent, catalytic) inhibitor gamma	U	0.797893	No
SDC4	Syndecan 4 (amphiglycan, ryudocan)	D	0.797512	No
RPRM	Reprimo, TP53 dependant G2 arrest mediator candidate	D	0.796973	No
MTBP	Mdm2, transformed 3T3 cell double minute 2, p53 binding protein (mouse) binding protein, 104kDa	D	0.796764	No
FGF7	Galactokinase 2	U	0.796737	No
CPXM2	Carboxypeptidase X (M14 family), member 2	U	0.796272	No
KITLG	KIT ligand	U	0.795987	No
EMILIN2	Elastin microfibril interfacer 2	U	0.794864	No
C2	Complement component 2	U	0.794797	No
IGFBP2	Insulin-like growth factor binding protein 2, 36kDa	D	0.794722	No
LIN9	Lin-9 homolog (C. elegans)	D	0.794711	No
ZDHHC13	Zinc finger, DHHC domain containing 13	D	0.79413	No
ABHD5	Abhydrolase domain containing 5	U	0.793719	No
MCM2	MCM2 minichromosome maintenance deficient 2, mitotin (S. cerevisiae)	D	0.793355	No
OAT	Ornithine aminotransferase (gyrate atrophy)	D	0.792555	No
FGL2	Fibrinogen-like 2	U	0.792243	No
ZAK	Sterile alpha motif and leucine zipper containing kinase AZK	U	0.792106	No
PTGS1	Prostaglandin-endoperoxide synthase 1 (prostaglandin G/H synthase and cyclooxygenase)	U	0.792	No
ICAM1	Intercellular adhesion molecule 1 (CD54), human rhinovirus receptor	U	0.791986	No
RAPGEF5	Rap guanine nucleotide exchange factor (GEF) 5	U	0.791642	No
MAMDC2	MAM domain containing 2	U	0.791594	No
DKK3	Dickkopf homolog 3 (Xenopus laevis)	D	0.791321	No
F2RL2	Coagulation factor II (thrombin) receptor-like 2	D	0.791162	No
RASSF4	Ras association (RalGDS/AF-6) domain family 4	U	0.790439	No
MOCS1	Molybdenum cofactor synthesis 1	U	0.790418	No
ATF3	Activating transcription factor 3	U	0.790406	No
GIMAP8	GTPase, IMAP family member 8	U	0.790161	No
PCYOX1	Prenylcysteine oxidase 1	U	0.789824	No
SUMO1	SMT3 suppressor of mif two 3 homolog 1 (yeast)	U	0.789585	No
PCOLCE	Procollagen C-endopeptidase enhancer	U	0.788851	No
COL15A1	Collagen, type XV, alpha 1	U	0.787997	No
KLRG1	Killer cell lectin-like receptor subfamily G, member 1	U	0.787977	No
LOXL1	Lysyl oxidase-like 1	U	0.787178	No
HIST2H2AB	Histone 2, H2ab	D	0.7869	No
YPEL4	Yippee-like 4 (Drosophila)	D	0.786627	No
GLI4	GLI-Kruppel family member GLI4	U	0.786386	No
DGAT1	Diacylglycerol O-acyltransferase homolog 1 (mouse)	U	0.786129	No
CRTAP	Cartilage associated protein	U	0.786012	No
THBS2	Thrombospondin 2	U	0.785699	No
ITGA2	Integrin, alpha 2 (CD49B, alpha 2 subunit of VLA-2 receptor)	D	0.785477	No
FMO1	Flavin containing monooxygenase 1	D	0.7847	No
MCTP1	Multiple C2-domains with two transmembrane regions 1	U	0.78464	No
ADAM22	A disintegrin and metalloproteinase domain 22	D	0.783788	No
HEY2	Hairy/enhancer-of-split related with YRPW motif 2	D	0.783055	No
BBC3	BCL2 binding component 3	U	0.782884	No
CKMT2	Creatine kinase, mitochondrial 2 (sarcomeric)	U	0.782577	No
PLAT	Plasminogen activator, tissue	D	0.781675	No
C9orf72	Chromosome 9 open reading frame 72	U	0.781672	No
KIAA1524	KIAA1524 protein	D	0.781099	No
BZW1	Basic leucine zipper and W2 domains 1	U	0.78108	No
KIF20A	Kinesin family member 20A	D	0.779723	No
THBS1	Thrombospondin 1	D	0.778947	No
EHBP1	EH domain binding protein 1	U	0.77829	No
LATS2	LATS, large tumor suppressor, homolog 2 (Drosophila)	U	0.778174	No
ZNF575	Zinc finger protein 575	U	0.777708	No
ANLN	Anillin, actin binding protein (scraps homolog, Drosophila)	D	0.777608	No
ABCA10	ATP-binding cassette, sub-family A (ABC1), member 10	U	0.777099	No
DRD5	Dopamine receptor D5	U	0.77599	No
ID4	Inhibitor of DNA binding 4, dominant negative helix-loop-helix protein	D	0.775307	No
MITF	Microphthalmia-associated transcription factor	U	0.775281	No
CPE	Carboxypeptidase E	U	0.774686	No
CDKN1A	Cyclin-dependent kinase inhibitor 1A (p21, Cip1)	U	0.774191	No
KLF10	Kruppel-like factor 10	U	0.773599	No
KCNJ14	Potassium inwardly-rectifying channel, subfamily J, member 14	D	0.77338	No
GLRB	Glycine receptor, beta	U	0.773164	No
MMP11	Matrix metalloproteinase 11 (stromelysin 3)	D	0.772967	No
CD68	CD68 antigen	U	0.772621	No
RTN4	Reticulon 4	U	0.77154	No
KIAA1644	KIAA1644 protein	U	0.771398	No
ZNF552	Zinc finger protein 552	D	0.771184	No
PRRX2	Paired related homeobox 2	D	0.770773	No
NFIL3	Nuclear factor, interleukin 3 regulated	U	0.770751	No
GALNT6	UDP-N-acetyl-alpha-D-galactosamine:polypeptide N-acetylgalactosaminyltransferase 6 (GalNAc-T6)	D	0.770427	No
EPB41L2	Erythrocyte membrane protein band 4.1-like 2	U	0.769413	No
SOCS3	Suppressor of cytokine signaling 3	U	0.769294	No
ELL3	Elongation factor RNA polymerase II-like 3	D	0.769196	No
HLA-DPB1	Major histocompatibility complex, class II, DP beta 1	D	0.769193	No
CPNE5	Copine V	D	0.76893	No
CD86	CD86 antigen (CD28 antigen ligand 2, B7-2 antigen)	U	0.768234	No
ULBP2	UL16 binding protein 2	D	0.76765	No
H2AFJ	H2A histone family, member J	U	0.767592	No
CYP7B1	Cytochrome P450, family 7, subfamily B, polypeptide 1	U	0.767495	No
STAT1	Signal transducer and activator of transcription 1, 91kDa	U	0.767205	No
COLEC12	Collectin sub-family member 12	U	0.767094	No
SYNPO2	Synaptopodin 2	U	0.766588	No
NR4A3	Nuclear receptor subfamily 4, group A, member 3	D	0.766556	No
NQO1	NAD(P)H dehydrogenase, quinone 1	U	0.76581	No
LRCH2	Leucine-rich repeats and calponin homology (CH) domain containing 2	U	0.765729	No
OLIG1	Oligodendrocyte transcription factor 1	D	0.765535	No
NMNAT2	Nicotinamide nucleotide adenylyltransferase 2	U	0.765468	No
IGF1	Insulin-like growth factor 1 (somatomedin C)	U	0.764963	No
TAGAP	T-cell activation GTPase activating protein	U	0.764694	No
CAMK1	Calcium/calmodulin-dependent protein kinase I	U	0.764583	No
AVIL	Advillin	U	0.764325	No
CYP2B6	Cytochrome P450, family 2, subfamily B, polypeptide 6	D	0.763662	No
PLS1	Plastin 1 (I isoform)	D	0.76337	No
BNC2	Basonuclin 2	U	0.762711	No
RHOBTB1	Rho-related BTB domain containing 1	U	0.762477	No
BAALC	Brain and acute leukemia, cytoplasmic	U	0.762302	No
SMOC2	SPARC related modular calcium binding 2	U	0.762225	No
KCNAB1	Potassium voltage-gated channel, shaker-related subfamily, beta member 1	U	0.76136	No
GABARAPL1	GABA(A) receptor-associated protein like 1	U	0.761251	No
CENPF	Centromere protein F, 350/400ka (mitosin)	D	0.760053	No
USHBP1	Usher syndrome 1C binding protein 1	U	0.759976	No
EDN2	Endothelin 2	D	0.759151	No
CROT	Carnitine O-octanoyltransferase	D	0.758929	No
PAQR4	Progestin and adipoQ receptor family member IV	D	0.758804	No
AKR1B10	Aldo-keto reductase family 1, member B10 (aldose reductase)	D	0.757771	No
TBX10	T-box 10	D	0.757023	No
WEE1	WEE1 homolog (S. pombe)	D	0.756477	No
PDXK	Pyridoxal (pyridoxine, vitamin B6) kinase	U	0.756415	No
GLI2	GLI-Kruppel family member GLI2	D	0.756414	No
SLCO2A1	Solute carrier organic anion transporter family, member 2A1	D	0.756413	No
F3	Coagulation factor III (thromboplastin, tissue factor)	U	0.756252	No
ERBB2	V-erb-b2 erythroblastic leukemia viral oncogene homolog 2, neuro/glioblastoma derived oncogene homolog (avian)	D	0.7562	No
IL2RB	Interleukin 2 receptor, beta	D	0.756158	No
PLG	Plasminogen	D	0.756108	No
ZFPM2	Zinc finger protein, multitype 2	U	0.7559	No
PICALM	Phosphatidylinositol binding clathrin assembly protein	U	0.755284	No
PJA1	Praja 1	U	0.75457	No
BCL2A1	BCL2-related protein A1	D	0.75273	No
CDKN3	Cyclin-dependent kinase inhibitor 3 (CDK2-associated dual specificity phosphatase)	D	0.75273	No
BIRC3	Baculoviral IAP repeat-containing 3	D	0.752631	No
ELOVL4	Elongation of very long chain fatty acids (FEN1/Elo2, SUR4/Elo3, yeast)-like 4	D	0.752579	No
FKBP11	FK506 binding protein 11, 19 kDa	D	0.752483	No
HSPA4L	Heat shock 70kDa protein 4-like	D	0.751688	No
RBP1	Retinol binding protein 1, cellular	D	0.751519	No
RASL12	RAS-like, family 12	U	0.751508	No
EPS8	Epidermal growth factor receptor pathway substrate 8	U	0.750938	No
TPST1	Tyrosylprotein sulfotransferase 1	U	0.750764	No
SEMA3D	Sema domain, immunoglobulin domain (Ig), short basic domain, secreted, (semaphorin) 3D	D	0.750126	No
RSAD2	Radical S-adenosyl methionine domain containing 2	U	0.749997	No
ARHGAP24	Rho GTPase activating protein 24	U	0.749775	No
APOBEC3G	Apolipoprotein B mRNA editing enzyme, catalytic polypeptide-like 3G	D	0.74949	No
SLC14A1	Solute carrier family 14 (urea transporter), member 1 (Kidd blood group)	U	0.74943	No
HHAT	Hedgehog acyltransferase	D	0.748687	No
GAD1	Glutamate decarboxylase 1 (brain, 67kDa)	D	0.748461	No
ARC	Activity-regulated cytoskeleton-associated protein	D	0.748455	No
MMP19	Matrix metalloproteinase 19	U	0.748128	No
KCNC1	Potassium voltage-gated channel, Shaw-related subfamily, member 1	D	0.747659	No
HSD17B12	Hydroxysteroid (17-beta) dehydrogenase 12	U	0.746874	No
GPX2	Glutathione peroxidase 2 (gastrointestinal)	D	0.745769	No
HLA-A	Major histocompatibility complex, class I, A	U	0.745237	No
TXNRD1	Thioredoxin reductase 1	U	0.745048	No
NPTX1	Neuronal pentraxin I	D	0.744539	No
HIST1H2BD	Histone 1, H2bd	D	0.744226	No
CEBPB	CCAAT/enhancer binding protein (C/EBP), beta	U	0.744194	No
ZIC1	Zic family member 1 (odd-paired homolog, Drosophila)	D	0.744142	No
MRVI1	Murine retrovirus integration site 1 homolog	U	0.743283	No
TP53INP2	Tumor protein p53 inducible nuclear protein 2	U	0.742815	No
COL5A2	Collagen, type V, alpha 2	U	0.742779	No
SSTR1	Somatostatin receptor 1	D	0.741446	No
PRC1	Protein regulator of cytokinesis 1	D	0.741364	No
PTP4A1	Protein tyrosine phosphatase type IVA, member 1	D	0.741073	No
ACOX1	Acyl-Coenzyme A oxidase 1, palmitoyl	U	0.740364	No
HOXB4	Homeo box B4	U	0.740117	No
PGAM2	Phosphoglycerate mutase 2 (muscle)	U	0.739166	No
PLCL2	Phospholipase C-like 2	U	0.738742	No
STOM	Stomatin	U	0.738692	No
NKD1	Naked cuticle homolog 1 (Drosophila)	D	0.737765	No
POPDC3	Popeye domain containing 3	U	0.737643	No
RASA3	RAS p21 protein activator 3	U	0.736641	No
HOOK2	Hook homolog 2 (Drosophila)	U	0.736591	No
GNG7	Guanine nucleotide binding protein (G protein), gamma 7	D	0.736432	No
TLR5	Toll-like receptor 5	D	0.736388	No
OSM	Oncostatin M	U	0.735503	No
PCP4	Purkinje cell protein 4	D	0.735503	No
APBA1	Amyloid beta (A4) precursor protein-binding, family A, member 1 (X11)	D	0.73548	No
YPEL2	Yippee-like 2 (Drosophila)	U	0.734964	No
MFGE8	Milk fat globule-EGF factor 8 protein	D	0.734721	No
MYH2	Myosin, heavy polypeptide 2, skeletal muscle, adult	U	0.733809	No
NLGN1	Neuroligin 1	U	0.733595	No
SLAMF7	SLAM family member 7	D	0.733537	No
HOMER1	Homer homolog 1 (Drosophila)	D	0.733292	No
SCARF1	Scavenger receptor class F, member 1	U	0.73277	No
P2RX7	Purinergic receptor P2X, ligand-gated ion channel, 7	U	0.732328	No
SQLE	Squalene epoxidase	D	0.732209	No
NOVA1	Neuro-oncological ventral antigen 1	U	0.731507	No
NNT	Nicotinamide nucleotide transhydrogenase	U	0.730352	No
HIST1H1C	Histone 1, H1c	U	0.729157	No
SERPIND1	Serine (or cysteine) proteinase inhibitor, clade D (heparin cofactor), member 1	D	0.728638	No
CDH24	Cadherin-like 24	U	0.728328	No
CD9	CD9 antigen (p24)	D	0.727717	No
ZNF215	Zinc finger protein 215	D	0.727492	No
DNAJB4	DnaJ (Hsp40) homolog, subfamily B, member 4	U	0.72718	No
PGC	Progastricsin (pepsinogen C)	D	0.726656	No
AR	Androgen receptor (dihydrotestosterone receptor; testicular feminization; spinal and bulbar muscular atrophy; Kennedy disease)	U	0.726065	No
BZRAP1	Benzodiazapine receptor (peripheral) associated protein 1	D	0.723988	No
PAK3	P21 (CDKN1A)-activated kinase 3	D	0.723896	No
AMIGO2	Amphoterin induced gene 2	D	0.723296	No
SH3YL1	SH3 domain containing, Ysc84-like 1 (S. cerevisiae)	D	0.722739	No
FXYD1	FXYD domain containing ion transport regulator 1 (phospholemman)	U	0.722737	No
BCL3	B-cell CLL/lymphoma 3	D	0.722499	No
FLT1	Fms-related tyrosine kinase 1 (vascular endothelial growth factor/vascular permeability factor receptor)	U	0.721412	No
HOXA7	Homeo box A7	U	0.721012	No
FLRT2	Fibronectin leucine rich transmembrane protein 2	U	0.720063	No
PCDH18	Protocadherin 18	U	0.719549	No
IL18R1	Interleukin 18 receptor 1	U	0.719259	No
PTGER4	Prostaglandin E receptor 4 (subtype EP4)	U	0.718995	No
KIAA1033	KIAA1033 protein	U	0.718725	No
B3GNT5	UDP-GlcNAc:betaGal beta-1,3-N-acetylglucosaminyltransferase 5	D	0.718723	No
NEXN	Nexilin (F actin binding protein)	U	0.717969	No
UGT2B4	UDP glycosyltransferase 2 family, polypeptide B4	U	0.717405	No
IMMP2L	IMP2 inner mitochondrial membrane protease-like (S. cerevisiae)	U	0.716538	No
A4GALT	Alpha 1,4-galactosyltransferase	U	0.716144	No
COL6A3	Collagen, type VI, alpha 3	U	0.716038	No
LRP1B	Low density lipoprotein-related protein 1B (deleted in tumors)	U	0.715804	No
NIPSNAP3B	Nipsnap homolog 3B (C. elegans)	U	0.715756	No
OLFML3	Olfactomedin-like 3	U	0.715492	No
MS4A7	Membrane-spanning 4-domains, subfamily A, member 7	U	0.714443	No
RRAGD	Ras-related GTP binding D	U	0.714327	No
MAP3K8	Mitogen-activated protein kinase kinase kinase 8	U	0.713971	No
CBR3	Carbonyl reductase 3	D	0.713754	No
EFHC2	EF-hand domain (C-terminal) containing 2	D	0.713696	No
METRNL	Meteorin, glial cell differentiation regulator-like	U	0.71335	No
ROR1	Receptor tyrosine kinase-like orphan receptor 1	D	0.713143	No
SERTAD4	SERTA domain containing 4	D	0.712942	No
EVI2B	Ecotropic viral integration site 2B	U	0.711121	No
RALGPS2	Ral GEF with PH domain and SH3 binding motif 2	D	0.710708	No
RALB	V-ral simian leukemia viral oncogene homolog B (ras related; GTP binding protein)	U	0.710025	No
SLC13A5	Solute carrier family 13 (sodium-dependent citrate transporter), member 5	D	0.70927	No
GPSM2	G-protein signalling modulator 2 (AGS3-like, C. elegans)	D	0.709234	No
COL6A1	Collagen, type VI, alpha 1	U	0.708788	No
STARD8	START domain containing 8	U	0.708567	No
FLRT3	Fibronectin leucine rich transmembrane protein 3	D	0.708453	No
ARHGAP9	Rho GTPase activating protein 9	U	0.707835	No
MAP4	Microtubule-associated protein 4	U	0.706681	No
LYPLA1	Lysophospholipase I	U	0.705246	No
AASDH	2-aminoadipic 6-semialdehyde dehydrogenase	D	0.70513	No
SMNDC1	Survival motor neuron domain containing 1	U	0.705088	No
CDKN1C	Cyclin-dependent kinase inhibitor 1C (p57, Kip2)	U	0.705079	No
FGFR2	Fibroblast growth factor receptor 2 (bacteria-expressed kinase, keratinocyte growth factor receptor, craniofacial dysostosis 1, Crouzon syndrome, Pfeiffer syndrome, Jackson-Weiss syndrome)	D	0.70506	No
GUCY1B3	Guanylate cyclase 1, soluble, beta 3	U	0.704582	No
FAM20A	Family with sequence similarity 20, member A	U	0.704145	No
MAFB	V-maf musculoaponeurotic fibrosarcoma oncogene homolog B (avian)	U	0.70401	No
CDH18	Cadherin 18, type 2	D	0.703524	No
SH3BP5	SH3-domain binding protein 5 (BTK-associated)	U	0.703237	No
GRID1	Glutamate receptor, ionotropic, delta 1	U	0.703078	No
MARVELD3	MARVEL domain containing 3	D	0.703042	No
SLIT2	Slit homolog 2 (Drosophila)	U	0.702937	No
CCR7	Chemokine (C-C motif) receptor 7	D	0.702332	No
SNTB1	Syntrophin, beta 1 (dystrophin-associated protein A1, 59kDa, basic component 1)	D	0.702193	No
FRAS1	Fraser syndrome 1	D	0.701847	No
NCOA4	Nuclear receptor coactivator 4	U	0.701255	No
ADAMTS2	A disintegrin-like and metalloprotease (reprolysin type) with thrombospondin type 1 motif, 2	U	0.701033	No
PLK1	Polo-like kinase 1 (Drosophila)	D	0.70101	No
PDGFD	DNA-damage inducible protein 1	U	0.700324	No
KDELR2	KDEL (Lys-Asp-Glu-Leu) endoplasmic reticulum protein retention receptor 2	U	0.700281	No
ABHD3	Abhydrolase domain containing 3	U	0.700247	No
PDZRN3	PDZ domain containing RING finger 3	U	0.699029	No
EVI2A	Ecotropic viral integration site 2A	U	0.698294	No
CENPA	Centromere protein A, 17kDa	D	0.698213	No
ABCA6	ATP-binding cassette, sub-family A (ABC1), member 6	U	0.698021	No
TANK	TRAF family member-associated NFKB activator	D	0.697934	No
HOXB2	Homeo box B2	U	0.69768	No
MDGA1	MAM domain containing glycosylphosphatidylinositol anchor 1	D	0.69678	No
LRG1	Leucine-rich alpha-2-glycoprotein 1	D	0.696452	No
HIST1H4B	Histone 1, H4b	U	0.695859	No
CDH11	Cadherin 11, type 2, OB-cadherin (osteoblast)	D	0.695074	No
NFATC2	Nuclear factor of activated T-cells, cytoplasmic, calcineurin-dependent 2	U	0.694713	No
OSR1	Odd-skipped related 1 (Drosophila)	D	0.694091	No
LAMA2	Laminin, alpha 2 (merosin, congenital muscular dystrophy)	U	0.693755	No
NEDD9	Neural precursor cell expressed, developmentally down-regulated 9	U	0.693536	No
SATB2	SATB family member 2	U	0.693349	No
ADAMTS13	A disintegrin-like and metalloprotease (reprolysin type) with thrombospondin type 1 motif, 13	D	0.691656	No
DACT1	Dapper homolog 1, antagonist of beta-catenin (xenopus)	U	0.691488	No
GEM	GTP binding protein overexpressed in skeletal muscle	D	0.691181	No
ZNF585A	Zinc finger protein 585A	U	0.691097	No
RAB15	RAB15, member RAS onocogene family	D	0.69067	No
LZTS1	Leucine zipper, putative tumor suppressor 1	D	0.690565	No
C21orf58	Chromosome 21 open reading frame 58	D	0.690545	No
PDE4DIP	Phosphodiesterase 4D interacting protein (myomegalin)	U	0.690476	No
ABAT	4-aminobutyrate aminotransferase	D	0.689641	No
DACH1	Dachshund homolog 1 (Drosophila)	U	0.689451	No
CD69	CD69 antigen (p60, early T-cell activation antigen)	U	0.689294	No
CDH2	Cadherin 2, type 1, N-cadherin (neuronal)	D	0.689294	No
MYOM2	Myomesin (M-protein) 2, 165kDa	U	0.689188	No
CIT	Citron (rho-interacting, serine/threonine kinase 21)	D	0.688976	No
PTPRN2	Protein tyrosine phosphatase, receptor type, N polypeptide 2	U	0.688733	No
GATM	Glycine amidinotransferase (L-arginine:glycine amidinotransferase)	D	0.687548	No
LETM2	Leucine zipper-EF-hand containing transmembrane protein 2	D	0.687543	No
COL5A1	Collagen, type V, alpha 1	U	0.686761	No
HTR2B	5-hydroxytryptamine (serotonin) receptor 2B	U	0.686712	No
RTN1	Reticulon 1	U	0.686085	No
CABP7	Calcium binding protein 7	D	0.685958	No
SORCS2	Sortilin-related VPS10 domain containing receptor 2	U	0.685305	No
SLC31A2	Solute carrier family 31 (copper transporters), member 2	U	0.684906	No
ETV5	Ets variant gene 5 (ets-related molecule)	D	0.684369	No
RAB11FIP4	RAB11 family interacting protein 4 (class II)	D	0.683342	No
DUSP5	Dual specificity phosphatase 5	D	0.683229	No
CLK4	CDC-like kinase 4	U	0.683066	No
SLC35A1	Solute carrier family 35 (CMP-sialic acid transporter), member A1	D	0.682869	No
DMRTC1	DMRT-like family C1	D	0.682552	No
BCAP29	B-cell receptor-associated protein 29	U	0.682529	No
HES1	Hairy and enhancer of split 1, (Drosophila)	D	0.682469	No
KIF23	Kinesin family member 23	D	0.682174	No
CTSS	Cathepsin S	U	0.681522	No
ITGA8	Integrin, alpha 8	U	0.681508	No
PPAT	Phosphoribosyl pyrophosphate amidotransferase	D	0.681485	No
PDCD4	Programmed cell death 4 (neoplastic transformation inhibitor)	D	0.681325	No
SHC3	Chromosome 9 open reading frame 33	U	0.68067	No
MAF	V-maf musculoaponeurotic fibrosarcoma oncogene homolog (avian)	U	0.680642	No
ZNF567	Zinc finger protein 567	D	0.680434	No
PEA15	Phosphoprotein enriched in astrocytes 15	U	0.680165	No
SOCS2	Suppressor of cytokine signaling 2	U	0.679208	No
ADD3	Adducin 3 (gamma)	U	0.678502	No
NAALADL1	N-acetylated alpha-linked acidic dipeptidase-like 1	U	0.678181	No
SOD2	Superoxide dismutase 2, mitochondrial	U	0.677999	No
ITGAX	Integrin, alpha X (antigen CD11C (p150), alpha polypeptide)	D	0.677684	No
SHMT1	Serine hydroxymethyltransferase 1 (soluble)	U	0.677233	No
CHRD	Chordin	U	0.676728	No
CTSZ	Cathepsin Z	U	0.676005	No
PHYHIPL	Family with sequence similarity 13, member C1	D	0.675967	No
SLC9A6	Solute carrier family 9 (sodium/hydrogen exchanger), isoform 6	U	0.675729	No
TCN1	Transcobalamin I (vitamin B12 binding protein, R binder family)	D	0.67556	No
FZD1	Frizzled homolog 1 (Drosophila)	D	0.674843	No
F5	Coagulation factor V (proaccelerin, labile factor)	D	0.674049	No
PCDHB4	Protocadherin beta 4	U	0.673516	No
DNAH7	Dynein, axonemal, heavy polypeptide 7	D	0.672849	No
CDH7	Cadherin 7, type 2	U	0.672656	No
LRRC25	Leucine rich repeat containing 25	U	0.672043	No
LMOD1	Leiomodin 1 (smooth muscle)	U	0.672003	No
HELB	Helicase (DNA) B	D	0.671972	No
ZNF423	Zinc finger protein 423	U	0.671507	No
SLC9A3R2	Solute carrier family 9 (sodium/hydrogen exchanger), isoform 3 regulator 2	U	0.671364	No
FGFBP1	Fibroblast growth factor binding protein 1	D	0.671288	No
PLEKHA6	Pleckstrin homology domain containing, family A member 6	D	0.671201	No
IRAK3	Interleukin-1 receptor-associated kinase 3	U	0.6704	No
RAB8B	RAB8B, member RAS oncogene family	U	0.670201	No
GAS7	Growth arrest-specific 7	U	0.669907	No
CTSO	Cathepsin O	U	0.669516	No
ZNF541	Zinc finger protein 541	U	0.668964	No
TDGF1	Teratocarcinoma-derived growth factor 1	D	0.668807	No
ALAS1	Aminolevulinate, delta-, synthase 1	U	0.667802	No
PIWIL4	Piwi-like 4 (Drosophila)	D	0.667001	No
LIFR	Leukemia inhibitory factor receptor	U	0.66669	No
ENC1	Ectodermal-neural cortex (with BTB-like domain)	D	0.666525	No
PAIP2	Poly(A) binding protein interacting protein 2	U	0.666208	No
GRIN2D	Glutamate receptor, ionotropic, N-methyl D-aspartate 2D	U	0.665529	No
PPP3R1	Protein phosphatase 3 (formerly 2B), regulatory subunit B, 19kDa, alpha isoform (calcineurin B, type I)	U	0.665199	No
CDC42SE2	CDC42 small effector 2	D	0.664173	No
SEC14L2	SEC14-like 2 (S. cerevisiae)	D	0.664136	No
SH3KBP1	SH3-domain kinase binding protein 1	U	0.663864	No
COL6A2	Collagen, type VI, alpha 2	U	0.662556	No
SLC38A1	Solute carrier family 38, member 1	D	0.661425	No
SLC39A6	Solute carrier family 39 (zinc transporter), member 6	D	0.661217	No
NAV3	Neuron navigator 3	U	0.660901	No
CDADC1	Cytidine and dCMP deaminase domain containing 1	U	0.659977	No
COL4A4	Collagen, type IV, alpha 4	D	0.659616	No
CD3G	CD3G antigen, gamma polypeptide (TiT3 complex)	D	0.659401	No
GRP	Gastrin-releasing peptide	D	0.659163	No
CEPT1	Choline/ethanolamine phosphotransferase 1	U	0.6591	No
INPP4B	Inositol polyphosphate-4-phosphatase, type II, 105kDa	D	0.658779	No
ZDHHC21	Zinc finger, DHHC domain containing 21	D	0.658469	No
PPP1CB	Protein phosphatase 1, catalytic subunit, beta isoform	D	0.657906	No
HOXB9	Homeo box B9	D	0.657591	No
DAPK1	Death-associated protein kinase 1	U	0.656787	No
PRKACB	Protein kinase, cAMP-dependent, catalytic, beta	D	0.656695	No
PPP1R15A	Protein phosphatase 1, regulatory (inhibitor) subunit 15A	U	0.656322	No
MYL9	Myosin, light polypeptide 9, regulatory	U	0.655587	No
FAM43A	Family with sequence similarity 43, member A	U	0.654978	No
ESM1	Endothelial cell-specific molecule 1	D	0.654818	No
ZNF23	Zinc finger protein 19 (KOX 12)	U	0.654681	No
BAG4	BCL2-associated athanogene 4	U	0.65355	No
CPM	Carboxypeptidase M	U	0.653488	No
TRIP13	Thyroid hormone receptor interactor 13	D	0.653466	No
GNG13	Guanine nucleotide binding protein (G protein), gamma 13	D	0.653055	No
STK38L	Serine/threonine kinase 38 like	U	0.652245	No
DHRSX	Zinc finger, BED domain containing 1	U	0.651909	No
RAD18	RAD18 homolog (S. cerevisiae)	D	0.651839	No
FES	Feline sarcoma oncogene	U	0.651457	No
FMNL1	Formin-like 1	U	0.64972	No
CDON	Cell adhesion molecule-related/down-regulated by oncogenes	U	0.648048	No
IQGAP2	IQ motif containing GTPase activating protein 2	D	0.647398	No
CAPZA1	Capping protein (actin filament) muscle Z-line, alpha 1	U	0.64597	No
SERPINA6	Serine (or cysteine) proteinase inhibitor, clade A (alpha-1 antiproteinase, antitrypsin), member 6	D	0.645966	No
ZFHX4	Zinc finger homeodomain 4	U	0.64539	No
KCNE3	Potassium voltage-gated channel, Isk-related family, member 3	U	0.644553	No
STXBP3	Syntaxin binding protein 3	D	0.644543	No
KLF6	Kruppel-like factor 6	U	0.644345	No
CAP1	CAP, adenylate cyclase-associated protein 1 (yeast)	U	0.644247	No
KRT13	Keratin 13	D	0.643719	No
FNDC5	Fibronectin type III domain containing 5	U	0.642858	No
MCM10	MCM10 minichromosome maintenance deficient 10 (S. cerevisiae)	D	0.642711	No
RASGRP3	RAS guanyl releasing protein 3 (calcium and DAG-regulated)	U	0.642564	No
POLR2J2	DNA directed RNA polymerase II polypeptide J-related gene	D	0.641185	No
WWOX	WW domain containing oxidoreductase	D	0.640959	No
ALK	Anaplastic lymphoma kinase (Ki-1)	U	0.640804	No
MORF4L1	Mortality factor 4 like 1	U	0.640702	No
C1QTNF3	C1q and tumor necrosis factor related protein 3	U	0.640335	No
G6PC	Glucose-6-phosphatase, catalytic (glycogen storage disease type I, von Gierke disease)	D	0.639776	No
SESN1	Sestrin 1	U	0.639164	No
SOX2	SRY (sex determining region Y)-box 2	U	0.63753	No
B4GALT2	UDP-Gal:betaGlcNAc beta 1,4- galactosyltransferase, polypeptide 2	U	0.637183	No
CXorf21	Chromosome X open reading frame 21	U	0.636433	No
ACTR2	ARP2 actin-related protein 2 homolog (yeast)	U	0.63612	No
SESTD1	SEC14 and spectrin domains 1	U	0.63611	No
ORMDL1	ORM1-like 1 (S. cerevisiae)	D	0.635232	No
KCTD12	Potassium channel tetramerisation domain containing 12	U	0.634699	No
SELENBP1	Selenium binding protein 1	U	0.633542	No
MLYCD	Malonyl-CoA decarboxylase	U	0.632899	No
RASSF2	Ras association (RalGDS/AF-6) domain family 2	U	0.631745	No
TMC5	Transmembrane channel-like 5	D	0.630894	No
PTBP2	Polypyrimidine tract binding protein 2	D	0.63077	No
ZNF345	Zinc finger protein 345	D	0.630399	No
MASP2	Mannan-binding lectin serine protease 2	D	0.63	No
CTTNBP2	Cortactin binding protein 2	U	0.629293	No
COL8A2	Collagen, type VIII, alpha 2	D	0.629224	No
ADCY7	Adenylate cyclase 7	U	0.628885	No
FGD4	FYVE, RhoGEF and PH domain containing 4	U	0.628721	No
PAWR	PRKC, apoptosis, WT1, regulator	D	0.628244	No
ACVRL1	Activin A receptor type II-like 1	U	0.627621	No
MUM1L1	Melanoma associated antigen (mutated) 1-like 1	U	0.627584	No
TWSG1	Twisted gastrulation homolog 1 (Drosophila)	U	0.62733	No
ZNF22	Zinc finger protein 22 (KOX 15)	U	0.627237	No
PCDHB16	Protocadherin beta 16	U	0.627096	No
HNMT	Histamine N-methyltransferase	U	0.626633	No
CCND2	Cyclin D2	U	0.6263	No
SPHK1	Sphingosine kinase 1	D	0.626258	No
CACNB4	Calcium channel, voltage-dependent, beta 4 subunit	D	0.6262	No
RRM2	Ribonucleotide reductase M2 polypeptide	D	0.625136	No
HOXA9	Homeo box A9	U	0.624956	No
PDE4D	Phosphodiesterase 4D, cAMP-specific (phosphodiesterase E3 dunce homolog, Drosophila)	U	0.623225	No
THEG	Theg homolog (mouse)	U	0.62284	No
TRIM23	Tripartite motif-containing 23	U	0.622471	No
C14orf132	Chromosome 14 open reading frame 132	D	0.622153	No
KLF16	Kruppel-like factor 16	U	0.621913	No
GPR153	G protein-coupled receptor 153	U	0.621854	No
SCG3	Secretogranin III	D	0.62179	No
LAMP3	Lysosomal-associated membrane protein 3	D	0.621675	No
MYLK	Myosin, light polypeptide kinase	D	0.620807	No
GNG4	Guanine nucleotide binding protein (G protein), gamma 4	D	0.62069	No
ZNF469	Zinc finger protein 469	D	0.620464	No
CSRP1	Cysteine and glycine-rich protein 1	D	0.6203	No
LAMA3	Laminin, alpha 3	D	0.620001	No
ANKHD1	Eukaryotic translation initiation factor 4E binding protein 3	U	0.619999	No
GULP1	GULP, engulfment adaptor PTB domain containing 1	U	0.619937	No
IFIT1	Interferon-induced protein with tetratricopeptide repeats 1	U	0.619744	No
MAP3K1	Mitogen-activated protein kinase kinase kinase 1	D	0.619497	No
SLC7A7	Solute carrier family 7 (cationic amino acid transporter, y+ system), member 7	U	0.619074	No
CLN5	Ceroid-lipofuscinosis, neuronal 5	U	0.619007	No
OCLN	Occludin	D	0.618259	No
CXADR	Coxsackie virus and adenovirus receptor	D	0.618086	No
N4BP2	Nedd4 binding protein 2	D	0.617514	No
TK2	Thymidine kinase 2, mitochondrial	U	0.617067	No
CREM	CAMP responsive element modulator	U	0.616505	No
CDC42EP5	CDC42 effector protein (Rho GTPase binding) 5	U	0.616407	No
NR4A2	Nuclear receptor subfamily 4, group A, member 2	U	0.61632	No
SOX4	SRY (sex determining region Y)-box 4	D	0.616308	No
SGCD	Sarcoglycan, delta (35kDa dystrophin-associated glycoprotein)	U	0.6156	No
KIF1C	Kinesin family member 1C	U	0.614981	No
CAMTA1	Calmodulin binding transcription activator 1	D	0.614239	No
EREG	Epiregulin	D	0.613747	No
PCSK9	Proprotein convertase subtilisin/kexin type 9	D	0.61344	No
SLC4A7	Solute carrier family 4, sodium bicarbonate cotransporter, member 7	D	0.613433	No
FEZ1	Fasciculation and elongation protein zeta 1 (zygin I)	U	0.61326	No
TAGLN2	Transgelin 2	U	0.61192	No
PLEKHH2	Pleckstrin homology domain containing, family H (with MyTH4 domain) member 2	U	0.61047	No
SEL1L	Sel-1 suppressor of lin-12-like (C. elegans)	U	0.610362	No
CD47	CD47 antigen (Rh-related antigen, integrin-associated signal transducer)	D	0.609983	No
MYH10	Myosin, heavy polypeptide 10, non-muscle	U	0.609936	No
ZFPM1	Zinc finger protein, multitype 1	U	0.607841	No
EPB41L4A	Erythrocyte membrane protein band 4.1 like 4A	U	0.607727	No
BLM	Bloom syndrome	D	0.606394	No
IFIT3	Interferon-induced protein with tetratricopeptide repeats 3	U	0.606134	No
PCNP	PEST-containing nuclear protein	D	0.606035	No
KIF5C	Kinesin family member 5C	D	0.605043	No
PROSC	Proline synthetase co-transcribed homolog (bacterial)	U	0.604742	No
RNF122	Ring finger protein 122	U	0.604673	No
IFIT2	Interferon-induced protein with tetratricopeptide repeats 2	U	0.604217	No
IL27	Interleukin 27	U	0.603978	No
XK	Kell blood group precursor (McLeod phenotype)	D	0.603681	No
SNX9	Sorting nexin 9	U	0.602626	No
JAK1	Janus kinase 1 (a protein tyrosine kinase)	U	0.602114	No
ZNF44	Hypothetical protein DKFZp686L21136	U	0.601829	No
QKI	Quaking homolog, KH domain RNA binding (mouse)	U	0.601202	No
HFE	Hemochromatosis	U	0.599595	No
VMP1	Likely ortholog of rat vacuole membrane protein 1	D	0.599274	No
ZNF467	Zinc finger protein 467	U	0.598864	No
NDUFS1	NADH dehydrogenase (ubiquinone) Fe-S protein 1, 75kDa (NADH-coenzyme Q reductase)	U	0.598391	No
ADAMTS5	A disintegrin-like and metalloprotease (reprolysin type) with thrombospondin type 1 motif, 5 (aggrecanase-2)	U	0.597587	No
ITGAV	Integrin, alpha V (vitronectin receptor, alpha polypeptide, antigen CD51)	U	0.597542	No
ZNF493	Zinc finger protein 493	D	0.597527	No
CDCA2	Cell division cycle associated 2	D	0.596929	No
HBQ1	Hemoglobin, theta 1	U	0.596929	No
ABCC9	ATP-binding cassette, sub-family C (CFTR/MRP), member 9	U	0.596547	No
RAB1A	RAB1A, member RAS oncogene family	U	0.59577	No
SCN2B	Sodium channel, voltage-gated, type II, beta	D	0.595664	No
FRMD4A	FERM domain containing 4A	U	0.595527	No
HIPK3	Homeodomain interacting protein kinase 3	U	0.59493	No
LMO7	LIM domain 7	D	0.59477	No
ARHGAP6	Rho GTPase activating protein 6	U	0.594749	No
KIF4A	Kinesin family member 4A	D	0.594549	No
TTC1	Tetratricopeptide repeat domain 1	U	0.592937	No
PLAGL1	Pleiomorphic adenoma gene-like 1	U	0.592692	No
RFX3	Regulatory factor X, 3 (influences HLA class II expression)	D	0.591877	No
RHOJ	Ras homolog gene family, member J	U	0.591407	No
TGFBR3	Transforming growth factor, beta receptor III (betaglycan, 300kDa)	U	0.590631	No
KLF8	Kruppel-like factor 8	U	0.58982	No
ASPM	Asp (abnormal spindle)-like, microcephaly associated (Drosophila)	D	0.589734	No
FAM49A	Family with sequence similarity 49, member A	U	0.588876	No
SALL2	Sal-like 2 (Drosophila)	D	0.586902	No
AGPS	Alkylglycerone phosphate synthase	U	0.586248	No
ADAMTS1	A disintegrin-like and metalloprotease (reprolysin type) with thrombospondin type 1 motif, 1	U	0.586049	No
TBX3	T-box 3 (ulnar mammary syndrome)	D	0.585415	No
ITGB7	Integrin, beta 7	D	0.585332	No
HIST2H2AC	Histone 2, H2ac	D	0.584727	No
DST	Dystonin	D	0.58392	No
LAMP1	Lysosomal-associated membrane protein 1	U	0.583118	No
SMPD3	Sphingomyelin phosphodiesterase 3, neutral membrane (neutral sphingomyelinase II)	D	0.582694	No
MYO1A	Myosin IA	D	0.582502	No
DLX1	Distal-less homeo box 1	D	0.582265	No
TRIB1	Tribbles homolog 1 (Drosophila)	U	0.582199	No
PPP3CB	Protein phosphatase 3 (formerly 2B), catalytic subunit, beta isoform (calcineurin A beta)	D	0.58098	No
GCC2	GRIP and coiled-coil domain containing 2	U	0.580081	No
SEC14L1	SEC14-like 1 (S. cerevisiae)	U	0.579816	No
PLK2	Polo-like kinase 2 (Drosophila)	D	0.579655	No
PARP14	Poly (ADP-ribose) polymerase family, member 14	U	0.579503	No
FBXL19	F-box and leucine-rich repeat protein 19	D	0.57825	No
SHCBP1	SHC SH2-domain binding protein 1	D	0.57799	No
PELO	Integrin, alpha 1	U	0.577312	No
CRY1	Cryptochrome 1 (photolyase-like)	D	0.577081	No
SLC38A2	Solute carrier family 38, member 2	U	0.576498	No
ARRDC3	Arrestin domain containing 3	D	0.576385	No
SCARB1	Scavenger receptor class B, member 1	U	0.576007	No
SLC25A24	Solute carrier family 25 (mitochondrial carrier; phosphate carrier), member 24	U	0.575666	No
MYLIP	Myosin regulatory light chain interacting protein	U	0.574988	No
C6orf62	Chromosome 6 open reading frame 62	U	0.574967	No
JUN	V-jun sarcoma virus 17 oncogene homolog (avian)	U	0.574744	No
ARMCX2	Armadillo repeat containing, X-linked 2	D	0.574417	No
SSTR2	Somatostatin receptor 2	U	0.574044	No
PDGFRA	Platelet-derived growth factor receptor, alpha polypeptide	U	0.573631	No
SH3GL3	SH3-domain GRB2-like 3	D	0.573006	No
GAS6	Growth arrest-specific 6	U	0.572978	No
FHL2	Four and a half LIM domains 2	D	0.572813	No
RAP2B	RAP2B, member of RAS oncogene family	U	0.569906	No
DPYD	Dihydropyrimidine dehydrogenase	U	0.5699	No
TNIP2	TNFAIP3 interacting protein 2	U	0.569281	No
PAK2	P21 (CDKN1A)-activated kinase 2	U	0.569072	No
MYO1B	Myosin IB	U	0.568521	No
MAN1C1	Mannosidase, alpha, class 1C, member 1	U	0.568406	No
HSF2	Heat shock transcription factor 2	D	0.568111	No
SPATA13	Spermatogenesis associated 13	D	0.56806	No
HLA-C	Major histocompatibility complex, class I, C	U	0.567298	No
RAB3IL1	RAB3A interacting protein (rabin3)-like 1	U	0.567234	No
WNT4	Wingless-type MMTV integration site family, member 4	D	0.567223	No
TUB	Tubby homolog (mouse)	D	0.566464	No
HSPH1	Heat shock 105kDa/110kDa protein 1	D	0.565931	No
C10orf82	Chromosome 10 open reading frame 82	D	0.565499	No
GPR87	G protein-coupled receptor 87	D	0.565209	No
POLR2E	Polymerase (RNA) II (DNA directed) polypeptide E, 25kDa	U	0.565112	No
FMR1	Fragile X mental retardation 1	U	0.564141	No
TJP2	Tight junction protein 2 (zona occludens 2)	U	0.562919	No
ASCC3	DJ467N11.1 protein	D	0.562561	No
POLQ	Polymerase (DNA directed), theta	D	0.562524	No
IVNS1ABP	Influenza virus NS1A binding protein	D	0.562322	No
APPBP2	Amyloid beta precursor protein (cytoplasmic tail) binding protein 2	U	0.562176	No
GCNT1	Glucosaminyl (N-acetyl) transferase 1, core 2 (beta-1,6-N-acetylglucosaminyltransferase)	D	0.561986	No
KIF11	Kinesin family member 11	D	0.561856	No
NFATC1	Nuclear factor of activated T-cells, cytoplasmic, calcineurin-dependent 1	U	0.561776	No
PKD2	Polycystic kidney disease 2 (autosomal dominant)	U	0.561357	No
FAT4	FAT tumor suppressor homolog 4 (Drosophila)	U	0.561306	No
CDC14B	CDC14 cell division cycle 14 homolog B (S. cerevisiae)	U	0.56044	No
UBE2B	Ubiquitin-conjugating enzyme E2B (RAD6 homolog)	U	0.560109	No
ANKRD22	Ankyrin repeat domain 22	D	0.559672	No
GJA1	Gap junction protein, alpha 1, 43kDa (connexin 43)	U	0.559598	No
RBAK	RB-associated KRAB repressor	U	0.55849	No
MS4A2	Membrane-spanning 4-domains, subfamily A, member 2 (Fc fragment of IgE, high affinity I, receptor for; beta polypeptide)	U	0.558379	No
KCNMA1	Potassium large conductance calcium-activated channel, subfamily M, alpha member 1	D	0.558369	No
LTBP2	Latent transforming growth factor beta binding protein 2	D	0.558206	No
COMMD6	COMM domain containing 6	U	0.557972	No
GBP1	Guanylate binding protein 1, interferon-inducible, 67kDa	D	0.556776	No
SLC2A14	Solute carrier family 2 (facilitated glucose transporter), member 3	U	0.556734	No
HPCAL1	Hippocalcin-like 1	D	0.556224	No
SORD	Sorbitol dehydrogenase	D	0.556111	No
SETBP1	SET binding protein 1	D	0.556005	No
POP1	Processing of precursor 1, ribonuclease P/MRP subunit (S. cerevisiae)	D	0.555168	No
ZBTB1	Zinc finger and BTB domain containing 1	D	0.554992	No
PRKAR1A	Protein kinase, cAMP-dependent, regulatory, type I, alpha (tissue specific extinguisher 1)	U	0.554771	No
PPP1R12A	Protein phosphatase 1, regulatory (inhibitor) subunit 12A	U	0.554741	No
CPS1	Carbamoyl-phosphate synthetase 1, mitochondrial	D	0.554535	No
BTG2	BTG family, member 2	U	0.554441	No
PDE7A	Phosphodiesterase 7A	D	0.553645	No
B3GNT7	UDP-GlcNAc:betaGal beta-1,3-N-acetylglucosaminyltransferase 7	D	0.553388	No
ADRBK2	Adrenergic, beta, receptor kinase 2	U	0.552954	No
GSTM4	Glutathione S-transferase M4	D	0.55236	No
NCOA7	Nuclear receptor coactivator 7	D	0.55171	No
MFHAS1	Malignant fibrous histiocytoma amplified sequence 1	U	0.551606	No
IER5	Immediate early response 5	U	0.55134	No
KLC2	Likely ortholog of kinesin light chain 2	D	0.550248	No
GAS1	Growth arrest-specific 1	U	0.550088	No
GPRASP1	G protein-coupled receptor associated sorting protein 1	D	0.549603	No
TRIM14	Tripartite motif-containing 14	D	0.549513	No
RDH10	Retinol dehydrogenase 10 (all-trans)	U	0.548968	No
ZNF75A	Zinc finger protein 75a	D	0.548842	No
PARD6G	Par-6 partitioning defective 6 homolog gamma (C. elegans)	D	0.547847	No
TRIM59	Tripartite motif-containing 59	D	0.54777	No
PIK3R3	Phosphoinositide-3-kinase, regulatory subunit 3 (p55, gamma)	U	0.547173	No
AMFR	Autocrine motility factor receptor	D	0.54657	No
FANCC	Fanconi anemia, complementation group C	D	0.546025	No
IPO7	Importin 7	D	0.545264	No
CXorf36	Chromosome X open reading frame 36	U	0.543855	No
RBM11	RNA binding motif protein 11	D	0.543439	No
FBN2	Fibrillin 2 (congenital contractural arachnodactyly)	D	0.542972	No
GPLD1	Glycosylphosphatidylinositol specific phospholipase D1	U	0.541781	No
UBE2C	Ubiquitin-conjugating enzyme E2C	D	0.541309	No
TPM1	Tropomyosin 1 (alpha)	D	0.540694	No
TBL1XR1	Transducin (beta)-like 1X-linked receptor 1	U	0.540565	No
GTF2A1	General transcription factor IIA, 1, 19/37kDa	U	0.53944	No
CDT1	DNA replication factor	D	0.539078	No
ZNF564	Zinc finger protein 564	U	0.53889	No
RNF138	Ring finger protein 138	D	0.5386	No
PDLIM2	PDZ and LIM domain 2 (mystique)	U	0.537956	No
MBNL3	Muscleblind-like 3 (Drosophila)	U	0.53772	No
BICD2	Bicaudal D homolog 2 (Drosophila)	U	0.537253	No
CA13	Carbonic anhydrase XIII	D	0.536127	No
PKLR	Pyruvate kinase, liver and RBC	U	0.536053	No
SEZ6L	Seizure related 6 homolog (mouse)-like	D	0.536053	No
SLC1A2	Solute carrier family 1 (glial high affinity glutamate transporter), member 2	D	0.536009	No
CD1E	CD1E antigen, e polypeptide	D	0.535951	No
GPR171	G protein-coupled receptor 171	D	0.535951	No
FBXO11	F-box protein 11	U	0.535835	No
UGCG	UDP-glucose ceramide glucosyltransferase	U	0.534704	No
BTN3A1	Butyrophilin, subfamily 3, member A1	U	0.53444	No
UVRAG	UV radiation resistance associated gene	U	0.534389	No
TIMD4	T-cell immunoglobulin and mucin domain containing 4	U	0.533506	No
VIL1	Villin 1	U	0.533506	No
ATP10D	ATPase, Class V, type 10D	D	0.533243	No
ELMOD1	ELMO domain containing 1	U	0.532396	No
YTHDC2	YTH domain containing 2	U	0.53142	No
LRRC2	Leucine rich repeat containing 2	D	0.531365	No
DMBT1	Deleted in malignant brain tumors 1	D	0.531044	No
HOXA3	Homeo box A3	U	0.53056	No
HS2ST1	Heparan sulfate 2-O-sulfotransferase 1	U	0.530338	No
RAB5A	RAB5A, member RAS oncogene family	U	0.530257	No
PDE6D	Phosphodiesterase 6D, cGMP-specific, rod, delta	U	0.53019	No
ANP32E	Acidic (leucine-rich) nuclear phosphoprotein 32 family, member E	D	0.528452	No
ZNF594	Zinc finger protein 594	D	0.528421	No
RPL31	Ribosomal protein L31	D	0.528252	No
STAU2	Staufen, RNA binding protein, homolog 2 (Drosophila)	U	0.528004	No
CXXC5	CXXC finger 5	U	0.52787	No
PPARGC1B	Peroxisome proliferative activated receptor, gamma, coactivator 1, beta	U	0.527836	No
HIC1	Hypermethylated in cancer 1	U	0.527273	No
LRRIQ1	Leucine-rich repeats and IQ motif containing 1	D	0.526069	No
BTN2A2	Butyrophilin, subfamily 2, member A2	D	0.524758	No
RPL10A	Ribosomal protein L10a	D	0.524724	No
DNAJC10	DnaJ (Hsp40) homolog, subfamily C, member 10	D	0.523694	No
FILIP1	Filamin A interacting protein 1	U	0.523244	No
FLNA	Filamin A, alpha (actin binding protein 280)	U	0.523142	No
NEK8	NIMA (never in mitosis gene a)- related kinase 8	U	0.522883	No
BMPR1A	Bone morphogenetic protein receptor, type IA	U	0.522494	No
TOB1	Transducer of ERBB2, 1	D	0.522151	No
ARHGAP11A	Rho GTPase activating protein 11A	D	0.52145	No
FZD3	Frizzled homolog 3 (Drosophila)	D	0.520691	No
PDGFC	Platelet derived growth factor C	U	0.520679	No
TNPO1	Transportin 1	U	0.520073	No
RNF146	Ring finger protein 146	U	0.520038	No
RNF34	Ring finger protein 34	U	0.519979	No
CACNA1I	Calcium channel, voltage-dependent, alpha 1I subunit	U	0.518708	No
INE1	Inactivation escape 1	D	0.518114	No
FNBP1L	Formin binding protein 1-like	D	0.517937	No
NFKBIA	Nuclear factor of kappa light polypeptide gene enhancer in B-cells inhibitor, alpha	U	0.517768	No
KCNJ13	Potassium inwardly-rectifying channel, subfamily J, member 13	D	0.517683	No
ATRX	Alpha thalassemia/mental retardation syndrome X-linked (RAD54 homolog, S. cerevisiae)	U	0.517514	No
CHRNA5	Cholinergic receptor, nicotinic, alpha polypeptide 5	D	0.516968	No
PSD3	Pleckstrin and Sec7 domain containing 3	D	0.516966	No
TCF7L2	Transcription factor 7-like 2 (T-cell specific, HMG-box)	U	0.516924	No
ANKRD12	Ankyrin repeat domain 12	U	0.51668	No
PTPRK	Protein tyrosine phosphatase, receptor type, K	D	0.515925	No
SERP1	Stress-associated endoplasmic reticulum protein 1	D	0.515878	No
MPP7	Membrane protein, palmitoylated 7 (MAGUK p55 subfamily member 7)	D	0.514651	No
CEACAM1	Carcinoembryonic antigen-related cell adhesion molecule 1 (biliary glycoprotein)	D	0.514145	No
COX6B2	Cytochrome c oxidase subunit VIb polypeptide 2 (testis)	D	0.513315	No
SNX17	Sorting nexin 17	U	0.513223	No
PPP1R12B	Protein phosphatase 1, regulatory (inhibitor) subunit 12B	D	0.512575	No
JAK3	Janus kinase 3 (a protein tyrosine kinase, leukocyte)	D	0.512432	No
F2R	Coagulation factor II (thrombin) receptor	U	0.511881	No
VIPR1	Vasoactive intestinal peptide receptor 1	U	0.511651	No
SLC39A7	Solute carrier family 39 (zinc transporter), member 7	D	0.511102	No
[truncated: 559 more rows]

## Sheet: IFN
Gene Symbol	Weight Vector
IFI44	1.05777
IFI44L	1.05955
DDX58	0.977253
IFI6	1.01104
IFI27	0.977673
IFIT2	0.867092
IFIT1	1.04681
IFIT3	1.03936
CXCL10	0.667513
MX1	1.10944
OAS1	0.964057
OAS2	1.12097
OAS3	0.999624
HERC5	0.903564
SAMD9	0.903697
HERC6	1.02462
DDX60	1.05173
RTP4	0.786691
IFIH1	1.02241
STAT1	1.15005
TAP1	0.762138
OASL	0.838651
RSAD2	0.964653
ISG15	1.04812

## Sheet: TGFb
Gene Symbol
MMP3
SPARC
MMP19
TIMP1
RHOQ
CTNNB1
MMP2
SERPINE1
TCF7L2
COL3A1
IGFBP5
LRP1
IGFBP2
LRRC17
EPHB3
PLAT
COL8A1
MMP1
THBS2
RHOB
COL6A3
MMP11
COL1A2
THBS1
ICAM1
LAMA4
PAK2
ITGB2
COL6A1

## Sheet: CSR
Gene Symbol	Directionality vector
ADAMTS1	1
ADD3	-1
APOD	-1
APP	-1
ARHGAP12	-1
ARHGEF3	-1
ATP6V0A1	-1
AXIN2	-1
BBC3	-1
BCCIP	1
BCL6	-1
BRCA2	1
BRIP1	1
C1S	-1
CAMLG	-1
CBX1	1
CCNG2	-1
CCNL2	-1
CCT5	1
CDC14B	-1
CDCA4	1
CDK2	1
CDKN1A	-1
CDKN1C	-1
CENPJ	1
CHEK1	1
CKLF	1
CLCN6	-1
CLIC2	-1
CNTNAP1	-1
COPS6	1
CORO1C	1
COTL1	1
COX17	1
CRTAP	-1
CSF1	-1
CST3	-1
CTNS	-1
CTSF	-1
CYP27A1	-1
DCK	1
DCLRE1B	1
DHFR	1
DNM1	-1
DPP7	-1
DPYSL2	-1
DUSP22	-1
DUT	1
EBNA1BP2	1
EEF1E1	1
EIF4EBP1	1
EIF4G1	1
EMP2	1
ENO1	1
EPHB1	1
F10	-1
F3	1
FABP3	-1
FADS1	-1
FADS2	-1
FCGRT	-1
FDPS	-1
FLNC	1
FYCO1	-1
GABARAPL1	-1
GABBR1	-1
GATM	-1
GGH	1
GLS	-1
GNG11	1
GPLD1	1
GSN	-1
H2AFZ	1
HAS2	1
HDAC5	-1
HECA	-1
HMGB1	1
HMGCS1	-1
HMGN2	1
HN1L	1
ID2	1
ID3	1
IDI1	-1
IFRD2	1
IGBP1	-1
IL1R1	-1
IL6ST	-1
IL7R	1
IMP4	1
INSIG1	-1
IPO4	1
ITGA6	1
ITPKB	-1
JAG1	-1
KIAA1109	-1
KIT	-1
KLHL5	-1
LDB1	-1
LDLR	-1
LIPA	-1
LMNB2	1
LOXL2	1
LPIN1	-1
LRIG2	-1
LRP1	-1
LSM3	1
LSM4	1
LSS	-1
LUM	-1
LYAR	1
MAF	-1
MAN1A1	-1
MAP3K8	1
MAPRE1	1
MBP	-1
MCM3	1
MCM7	1
MEF2D	-1
MET	1
MFGE8	-1
MKKS	1
MNAT1	1
MRPL12	1
MRPL37	1
MRPS16	1
MRPS28	1
MSN	1
MT1F	1
MT3	1
MTHFD1	1
MVD	-1
MXI1	-1
MYBL1	1
MYBL2	1
MYCBP	1
MYL6	1
NCOA3	-1
NLN	1
NME1	1
NUDT1	1
NUP107	1
NUTF2	1
OSBPL8	-1
PA2G4	1
PAICS	1
PBXIP1	-1
PCSK7	1
PDAP1	1
PDK2	-1
PFKP	1
PFN1	1
PITPNC1	1
PKIG	-1
PLA2R1	-1
PLAUR	1
PLD3	-1
PLG	1
PLOD2	1
PLXNB1	-1
PNN	1
POLE2	1
POLR3K	1
POR	-1
PPIH	1
PSMA7	1
PSMC3	1
PSMD12	1
PSMD14	1
PSMD2	1
PTPRU	-1
PTS	1
RARRES3	-1
RBM14	1
RBMX	1
REV3L	-1
RFC3	1
RNASEH2A	1
RNF138	1
RNF41	1
RPN1	1
RRM2B	-1
RUVBL1	1
SATB1	-1
SCD	-1
SDC1	1
SELENBP1	-1
SERPING1	-1
SFTPB	-1
SLC16A1	1
SLC25A5	1
SLC35E2	-1
SLC40A1	-1
SLC5A3	-1
SLPI	-1
SMS	1
SMURF2	1
SNRPA	1
SNRPA1	1
SNRPB	1
SNRPC	1
SNRPD1	1
SNRPE	1
SQLE	-1
SQRDL	-1
SRM	1
SSR3	1
SSSCA1	1
STK17A	1
SVIL	-1
TAGLN	1
TBRG1	-1
TCEB1	1
TFPI2	1
TIMP2	-1
TNFAIP2	-1
TNFRSF12A	1
TNFSF12	-1
TNXB	-1
TOMM40	1
TP53INP1	-1
TPI1	1
TPM1	1
TPM2	1
TRIM22	-1
TUBG1	1
UAP1	1
UBE2J1	1
UMPS	1
VAMP4	-1
VDAC1	1
WBP2	-1
WDHD1	1
WSB1	-1
WSB2	1
WTAP	-1
ZNF219	-1
ZNF83	-1

## Sheet: Macrophage
Gene Symbol
CD163
CD68
CD84
MS4A4A

## Sheet: CD8 T-cells
Gene Symbol
CD8A
CD8B

## Sheet: IGF ligand signature
Entrez ID	Gene Symbol	Directionality Vector
2	A2M	1
10351	ABCA8	1
25890	ABI3BP	1
32	ACACB	1
72	ACTG2	-1
120	ADD3	1
124	ADH1A	1
125	ADH1B	1
3899	AFF3	1
217	ALDH2	1
301	ANXA1	1
358	AQP1	1
51309	ARMCX1	1
6790	AURKA	1
91653	BOC	1
11067	C10orf10	1
56892	C8orf4	1
810	CALML3	-1
51806	CALML5	-1
857	CAV1	1
858	CAV2	1
84733	CBX2	1
57124	CD248	1
948	CD36	1
55839	CENPN	1
55165	CEP55	1
1675	CFD	1
84952	CGNL1	-1
1149	CIDEA	1
8483	CILP	1
7122	CLDN5	1
7123	CLEC3B	1
1306	COL15A1	1
1308	COL17A1	-1
81035	COLEC12	1
1346	COX7A1	1
1410	CRYAB	1
6376	CX3CL1	-1
6387	CXCL12	1
79901	CYBRD1	1
116159	CYYR1	1
1634	DCN	1
1805	DPT	1
1879	EBF1	1
2202	EFEMP1	1
133584	EGFLAM	1
1959	EGR2	1
51705	EMCN	1
5168	ENPP2	1
2034	EPAS1	1
2151	F2RL2	1
2167	FABP4	1
2192	FBLN1	1
2199	FBLN2	1
2273	FHL1	1
2327	FMO2	1
8322	FZD4	1
50486	G0S2	1
2690	GHR	1
168537	GIMAP7	1
2791	GNG11	1
57678	GPAM	1
2719	GPC3	1
2819	GPD1	1
338328	GPIHBP1	1
2878	GPX3	1
2934	GSN	1
2947	GSTM3	1
3202	HOXA5	1
51170	HSD17B11	1
5654	HTRA1	1
3397	ID1	1
3489	IGFBP6	1
90865	IL33	1
11185	INMT	1
58494	JAM2	1
83700	JAM3	1
115207	KCTD12	1
3815	KIT	-1
3861	KRT14	-1
3866	KRT15	-1
3872	KRT17	-1
3909	LAMA3	1
9079	LDB2	1
3952	LEP	1
10186	LHFP	1
4023	LPL	1
10234	LRRC17	1
256691	MAMDC2	1
4128	MAOA	1
4147	MATN2	1
9833	MELK	1
4222	MEOX1	1
4311	MME	1
4638	MYLK	-1
64151	NCAPG	1
4692	NDN	1
4781	NFIB	1
4886	NPY1R	1
4915	NTRK2	1
220323	OAF	1
5021	OXTR	-1
54510	PCDH18	1
26577	PCOLCE2	1
8654	PDE5A	1
80310	PDGFD	1
5156	PDGFRA	1
5159	PDGFRB	1
5157	PDGFRL	1
5166	PDK4	1
5239	PGM5	1
221476	PI16	1
5284	PIGR	-1
219348	PLAC9	1
57088	PLSCR4	1
127435	PODN	1
5468	PPARG	1
5627	PROS1	1
284119	PTRF	1
116362	RBP7	1
5649	RELN	1
79785	RERGL	1
5997	RGS2	-1
8490	RGS5	1
6038	RNASE4	1
23521	RPL13A	-1
6280	S100A9	-1
286133	SCARA5	1
6319	SCD	1
8436	SDPR	1
10512	SEMA3C	1
6414	SEPP1	1
6423	SFRP2	1
8910	SGCE	1
83699	SH3BGRL2	1
152503	SH3D19	1
80704	SLC19A3	1
8140	SLC7A5	-1
9353	SLIT2	1
64094	SMOC2	1
10580	SORBS1	1
6678	SPARC	1
8404	SPARCL1	1
10418	SPON1	1
6696	SPP1	-1
10252	SPRY1	1
8406	SRPX	1
6867	TACC1	1
7018	TF	1
7048	TGFBR2	1
7049	TGFBR3	1
7060	THBS4	1
338773	TMEM119	1
83604	TMEM47	1
22974	TPX2	1
9319	TRIP13	1
128553	TSHZ2	1
7102	TSPAN7	1
10628	TXNIP	1
11065	UBE2C	1
79679	VTCN1	-1
7450	VWF	1
7704	ZBTB16	1
7538	ZFP36	1
25925	ZNF521	1

## Sheet: IGFR_activation_signature
GeneSymbol (Updated annotation, 2016)	Directionality vector
AARS	1
ABCD4	-1
ABCF2	1
ACAA2	-1
ACADSB	-1
ACAT1	-1
ACAT2	1
ACKR3	-1
ACLY	1
ACOT7	1
ACSS3	-1
ACTN1	1
ACTN4	1
ADAM2	-1
ADAP1	1
ADARB1	-1
ADCK3	-1
ADCY1	-1
ADD3	-1
ADRBK1	1
ADRM1	1
AEN	1
AGPAT3	1
AKAP9	-1
ALDH3A2	-1
ALDH6A1	-1
ALDH7A1	-1
ALDOA	1
ALDOA	1
ANG	-1
ANK3	-1
ANKRA2	-1
AP2S1	1
APAF1	-1
APBB2	-1
APBB2	-1
APBB2	-1
APEH	1
APEX1	-1
APPBP2	-1
AQP3	-1
AREG	1
ARHGAP32	-1
ARID4A	-1
ARID5B	-1
ARIH2	1											23608
ARMCX1	-1
ARPC1B	1
ARPC5L	1
ARRB1	-1
ARRB1	-1
ARRB1	-1
ASMTL	1
ASNS	1
ASPH	1
ATAD2B	1
ATG101	1
ATG14	-1
ATG4A	1
ATP2B4	-1
ATP7A	-1
ATP8A1	-1
ATP8A2	-1
ATXN3	-1
ATXN3	-1
AUH	-1
AUNIP	1
B3GALT4	-1
BAK1	1
BAMBI	-1
BBS10	-1
BBS9	-1
BBS9	-1
BCL2	-1
BCL6	-1
BCS1L	1
BDH2	-1
BEGAIN	1
BET1	-1
BEX4	-1
BIK	-1
BLNK	-1
BLVRB	1
BMP7	1
BNIP3L	-1
BNIP3L	-1
BPTF	-1
BRWD1	-1
BTG1	-1
BTG3	1
C11orf24	1
C11orf24	1
C11orf63	-1
C12orf4	1
C14orf93	-1
C16orf59	1
C1GALT1C1	-1
C1orf115	-1
C2CD5	-1
C4orf19	-1
C9orf40	1
CA4	1
CACYBP	1
CAMK2B	1
CAMK2G	-1
CAND1	-1
CAPN9	-1
CARS	1
CARS	1
CASK	1
CAST	-1
CAV1	-1
CBLB	-1
CCDC28A	-1
CCDC53	-1
CCDC86	1
CCNA1	1
CCND3	1
CCNG1	-1
CCNG2	-1
CCNG2	-1
CCP110	1
CD55	-1
CDCA4	1
CDK19	-1
CDK2	1
CDKN1A	1
CEBPB	1
CEBPG	1
CEP63	-1
CEP68	-1
CHORDC1	1
CHST12	-1
CHST15	-1
CHUK	1
CITED2	-1
CKB	1
CLMN	-1
CLMN	-1
CLN6	1
CLN8	1
CLPB	1
CLTB	1
CLTB	1
CLTB	1
CMC2	1
CNOT8	-1
COL21A1	-1
COL9A3	-1
COMMD9	-1
COPB1	-1
COPS3	1
CORO1A	1
CPD	-1
CRELD2	1
CRIPT	-1
CRYL1	-1
CRYZL1	-1
CSRP1	1
CTDSP2	-1
CTNNAL1	1
CTPS1	1
CTSC	1
CTSF	-1
CTSV	1
CXCR4	-1
CXCR4	-1
CXCR4	-1
CYB561	1
CYB561	1
CYBRD1	-1
CYC1	1
CYCS	1
CYP26B1	-1
CYP27B1	1
DBF4	1
DBI	1
DBI	1
DCAF11	-1
DCAF6	-1
DCPS	1
DDIT3	1
DDIT4	1
DDX43	-1
DEF8	1
DENND1A	1
DEPTOR	-1
DHCR7	1
DHCR7	1
DHRS11	1
DHX40	-1
DIAPH2	-1
DIO1	-1
DIRAS2	-1
DMP1	1
DNAAF1	-1
DNAJC9	1
DNAJC9	1
DNMT3B	1
DPM2	1
DPY19L4	-1
DRAM1	-1
DTNA	1
DTNA	1
DTNA	1
DTYMK	1
DUS1L	1
DUSP12	1
DUSP5	1
DUSP6	1
DUSP6	1
DVL3	1
DYNC2H1	-1
DYNC2LI1	-1											FGFR2	2263
DYNC2LI1	-1
EAPP	-1
EBP	1
EBP	1
EED	1
EFCAB11	-1
EFHD1	-1
EFHD2	1
EFNA1	-1
EGR3	1
EHHADH	-1
EIF2AK1	-1
EIF2AK1	-1
EIF2B3	1
EIF2S1	1
EIF3J	1
EIF4EBP1	1
ELF3	-1
ELOVL2	-1
ELOVL6	1
ELOVL6	1
EMC9	1
ENDOG	1
ENTPD6	1
EPHX2	-1
ERBB3	-1
ERBB4	-1
ERCC5	-1
ERMAP	-1
ETNK2	1
ETV5	1
EXD2	-1
EXOC1	-1
EXOSC8	1
EZH2	1
F12	1
FABP5	1
FADS3	1
FADS3	1
FAH	1
FAM110B	-1
FAM111A	-1
FAM114A1	-1
FAM129A	1
FAM134A	-1
FAM134A	-1
FAM134A	-1
FAM134B	-1
FAM149B1	-1
FAM172A	-1
FAM173A	1
FAM63A	-1
FANCF	-1
FAXDC2	-1											5534
FBN2	-1
FBXL4	-1
FBXO3	-1
FBXO5	1
FDFT1	1
FDPS	1
FEZ1	-1
FGF13	-1
FGFR2	-1
FHL1	-1
FHL1	-1
FHL2	1
FLNA	1
FLNA	1
FMO5	-1
FOS	-1
FOXN3	-1
FOXN3	-1
FOXO1	-1
FPGS	1
FRAT1	-1
FRAT2	-1
FRY	-1
FSCN1	1
FTSJ2	1
FTSJ2	1
FUBP1	1
FUCA1	-1
FXYD3	-1
FYCO1	-1
FZD2	-1
G6PD	1
GABARAPL2	-1
GABPB1	1
GAL	1
GALC	-1
GALE	1
GARS	1
GART	1
GCHFR	1
GEMIN2	1
GINS1	1
GLRX	-1
GLRX2	1
GLT8D1	-1
GLT8D1	-1
GLUL	-1
GMPR2	-1
GNA14	-1
GNS	-1
GNS	-1
GOLGB1	-1
GOLPH3L	-1
GPR137B	-1
GPRC5A	-1
GRB10	1
GRB10	1
GRB14	-1
GRN	-1
GRN	-1
GRN	-1
GRWD1	1
GSAP	-1
GSAP	-1
GTF2IRD2B	-1
GUCY1B3	1
GUSB	-1
H2AFZ	1
HAUS7	1
HBP1	-1
HCFC2	1
HEATR3	1
HEATR6	-1
HEATR6	-1
HECA	-1
HERC6	-1
HGH1	1
HGH1	1
HIST1H1C	-1
HIST1H2AE	-1
HIST1H2BD	-1
HIST1H2BD	-1
HMBS	1
HMGCL	-1
HMGCS1	1
HMOX2	1
HMOX2	1
HNMT	-1
HNMT	-1
HOMER2	1
HPCAL1	1
HPRT1	1
HSD17B6	-1
HSPH1	1
HTR2C	-1
IARS	1
ICE2	-1
ICMT	1
ICT1	1
IDI1	1
IFITM1	-1
IFRD1	1
IFRD1	1
IFRD2	1
IGBP1	-1
IGF2BP2	1
IGSF3	-1
IL1R1	-1
IL1RAP	1
IL27RA	1
IL6ST	-1
INSIG1	1
INSR	-1
IP6K2	-1
IPO4	1
IRAK1	1											81578
IRF3	1
IRS1	-1
IRS2	-1
IRS2	-1
ISG15	1
ITGAE	1
ITGB1BP1	1
ITGB5	-1
ITM2B	-1
JADE3	-1
JAK1	-1
KANSL1L	-1
KCNJ8	-1
KCNJ8	-1
KCNMA1	-1
KCNN2	-1
KCTD5	1
KDM3A	-1
KDM7A	-1
KHNYN	-1
KHNYN	-1
KIAA0430	-1
KIAA0513	-1
KIAA0922	-1
KIAA1551	-1
KIF3C	-1
KIFAP3	-1
KIZ	-1
KLC1	1
KLHDC2	-1
KLHL24	-1
KLHL24	-1
KLHL7	1
KPNA1	1
KRCC1	-1
KREMEN2	1
LAD1	1
LAD1	1
LAMB1	-1
LANCL1	-1
LARGE	-1
LDLR	1
LDLR	1
LDLRAD4	-1
LETMD1	-1
LGALS8	-1
LGALS8	-1
LHFPL2	1
LIMA1	-1
LMBRD1	-1
LMCD1	-1
LMO2	-1
LONP1	1
LOXL1	1
LOXL2	1
LRIG1	-1
LRP8	1
LRRC59	1
LSG1	1
MAGED2	-1
MAGED2	-1
MAGOHB	1
MAK16	1
MALL	1
MANBA	-1
MAOA	-1
MAOA	-1
MAP1B	1
MAP3K8	-1
MAP7D1	1
MAPK9	1
MAPKAPK5	1
2020-03-08	-1
MBTPS1	-1
MBTPS1	-1
MCCC1	-1
MCM10	1
MED23	-1
METRN	1
METTL7A	-1
MGP	1
MIA3	-1
MID1IP1	1
MKRN1	-1
MKRN1	-1
MLLT11	1
MLPH	-1
MME	-1
MMP10	1
MORC4	1
MRPL12	1
MRPL28	1
MRPL4	1
MRPS18A	1
MSMB	-1
MSMB	-1
MT1X	-1
MTG1	1
MTRR	1
MTUS1	-1
MVD	1
MXI1	-1
MYB	-1
MYB	-1
MYBL2	1
MYCL	-1
MYO19	1
MYOF	-1											Up	MLLT11	10962
N4BP2L1	-1
N4BP2L1	-1
NAA10	1
NAGPA	-1
NAT1	-1
NAV2	1
NBAS	-1											2908
NBR1	-1
NBR1	-1
NCOA2	-1
NCOA4	-1
NDRG1	-1
NEDD4L	-1											6605
NEK7	-1
NELL2	-1
NFIB	-1
NME5	-1
NMI	-1
NNT	-1
NOC2L	1
NOC4L	1
NOP16	1
NPY1R	-1
NPY5R	-1
NR2C1	-1
NR2F2	-1
NREP	-1
NRGN	1
NRIP1	-1
NRP1	1
NSUN5	1
NSUN5	1
NUDT2	-1
NUP155	1
NUP205	1
NUPR1	1
NXPH4	1
NXT1	1
OFD1	-1
OPN3	-1
OPTN	-1
OPTN	-1
ORAI3	-1
ORC6	1
OSBPL1A	-1
OSBPL1A	-1
OSBPL9	-1
P2RY2	1
PA2G4	1
PACSIN3	1
PAK1IP1	1
PALMD	-1
PAM16	1
PAQR4	1
PARP2	1
PARP4	-1
PARVA	-1											3119 /// 101060835
PBX1	-1
PBX1	-1
PBX1	-1
PBXIP1	-1
PBXIP1	-1
PCBP4	1
PCK2	1
PCMTD2	-1
PCNXL4	-1
PCTP	-1
PCYT2	1
PDCD5	1
PDK2	-1
PDLIM7	1
PDLIM7	1
PDSS1	1
PEA15	1
PEA15	1
PEX1	-1
PEX11A	-1
PEX11A	-1
PFKP	1
PGM3	-1
PHF3	-1
PHF3	-1
PHGDH	1
PHLDA2	1
PIGA	1
PIGP	-1
PIGV	-1
PIGV	-1
PIK3C3	-1
PIK3CA	-1
PIK3IP1	-1
PIK3IP1	-1
PINK1	-1
PKP3	1
PKP4	-1
PKP4	-1
PLCL1	-1
PLIN2	-1
PLOD3	1
PLSCR4	-1
PMM2	1
PMP22	-1
PMPCB	-1
PNP	1
PNRC1	-1
PNRC2	-1
POF1B	-1
POLA2	1
POLD2	1
POLE2	1
POLR3K	1
POT1	-1
PPIF	1
PPM1E	1
PPME1	1
PPOX	-1
PPP1R14B	1
PPP1R3D	-1
PPP3R1	1
PPT1	-1
PRCP	-1
PRMT2	-1
PRMT2	-1
PRNP	1
PROS1	-1
PRPF3	1
PRR3	1
PRUNE	-1
PSD3	-1
PSD4	-1
PSMC3IP	1
PSMC3IP	1
PSPH	1
PTGER3	-1
PTGER3	-1
PTGER3	-1
PTGER3	-1
PTGER3	-1
PTGER4	-1
PTPN13	-1
PTPN2	-1
PYCR1	1
QKI	-1
RAB29	-1
RAB40B	-1
RAB9A	-1
RAD54B	1
RAI2	-1
RALBP1	-1
RALGPS1	-1
RALY	1
RAMP1	-1
RAPGEF4	-1
RB1CC1	-1
RB1CC1	-1
RBL1	1
RBM7	-1
RCBTB1	-1
RCBTB2	-1
RDH11	1
REPS2	-1
REXO2	-1
RFC3	1
RFC5	1
RFK	1
RFX5	-1
RFX5	-1
RHOBTB1	-1
RIN2	-1
RLN2	-1
RNASE4	-1
RNASE4	-1
RNASEH1	1
RNF103	-1
RNF187	1
RNF216	1
RPL39L	1
RPS6KA3	1
RPS6KA4	1
RPS6KB2	1
RRAGB	-1
RRP15	1
RRP7A	1
RRP7A	1
RSBN1	-1
RTN2	-1
RUFY1	-1
RWDD2A	-1
S100A8	1
SAC3D1	1
SAP18	-1
SARS	1
SCD	1
SCD	1
SCUBE2	-1
SDCCAG3	1
SEC61A2	1
SECISBP2L	-1
SELENBP1	-1
SENP3	1
SEPP1	-1
SERINC1	-1
SERPINA3	1
SERPINB1	-1
SERPINB1	-1
SFN	1
SFN	1
SFN	1
SGMS1	-1
SH3BP5	-1
SH3YL1	-1
SHMT2	1
SIDT2	-1
SIDT2	-1
SIRT1	-1
SLC10A3	1
SLC1A2	-1
SLC1A5	1
SLC24A1	-1
SLC24A3	-1
SLC24A3	-1
SLC25A1	1
SLC25A10	1
SLC25A11	1
SLC25A11	1
SLC25A28	1
SLC25A32	1
SLC27A6	-1
SLC29A1	1
SLC29A3	-1
SLC2A10	-1
SLC31A1	1
SLC35D2	-1
SLC39A14	1
SLC39A4	1
SLC3A2	1
SLC52A2	1
SLC6A8	1
SLC7A1	1
SLC7A1	1
SLC7A11	1
SLC7A11	1
SLC7A5	1
SLCO4A1	1
SLCO4C1	1
SMARCE1	-1
SMCO4	1
SMG5	1
SMG5	1
SMPDL3A	-1
SNRPA1	1
SNRPA1	1
SNRPA1	1
SNX1	-1
SNX10	-1
SOCS1	-1
SOCS2	-1
SORL1	-1
SOS2	-1
SOX3	-1
SP100	-1
SP110	-1
SPAG1	1
SPATA7	-1
SPHK1	1
SPRY1	-1
SPSB3	-1
SPSB3	-1
SPTLC2	-1
SREBF2	1
SREBF2	1
SRM	1
SRRD	1
ST6GALNAC2	-1
STIP1	1
STON1	-1
STUB1	1
STXBP3	-1
SUSD4	1
SYF2	-1
SYNGR1	1
SYNRG	-1
TAGLN2	1
TARS	1
TBC1D15	-1
TBC1D19	-1
TBC1D5	-1
TBC1D9	-1											51761
TCEAL1	-1
TCF7L1	-1
TCOF1	1
TDRD7	-1
TFPI	-1
TGFBI	-1
THADA	-1
THADA	-1
THG1L	-1
THNSL1	-1
TIMM44	1
TIMM8B	1
TIMP3	-1
TK1	1
TMC6	1
TMEM106B	-1
TMEM110	1
TMEM135	-1
TMEM187	-1
TMEM222	1
TMEM222	1
TMEM254	-1
TMEM59	-1
TMEM8A	1
TMX2	1
TNFRSF11B	-1
TNFRSF11B	-1
TNFRSF12A	1
TNIK	1
TNIK	1
TOM1L1	-1
TOMM40	1
TOR3A	1
TOX3	1
TPK1	-1
TPP1	-1
TRAPPC6A	-1
TRIB3	1
TRIM14	1
TRIM2	-1
TRIM2	-1
TRIM8	-1
TRMT1L	-1
TSPAN12	-1
TSPAN15	1
TSR1	1
TSTA3	1
TSTA3	1
TTC13	1
TTC23	-1
TTC33	-1
TUBA1B	1
TUBA1B	1
TUBA1B	1
TUBA1B	1
TUBA1B	1
TUBA1C	1
TUBA1C	1
TUBA4A	1
TUBB	1
TUBB3	1
TUBB3	1
TUBB6	1
TUBG1	1
TYRP1	-1
UBE2I	-1
UBE2M	1
UBE2S	1
UBE3B	-1
UCHL3	1
ULK2	-1
UPK1A	-1
USP5	1
VARS	1
VAV3	-1
VAV3	-1
VCPKMT	1
VDR	1
VEGFA	1
VPS41	-1
VPS4B	-1
VRK1	1
VRK3	-1
WARS	1
WARS	1
WDHD1	1
WDHD1	1
WDR1	1
WDR1	1
WDR18	1
WDR19	-1
WDR45	-1
WDR45	-1
WDR48	-1
WDR48	-1
WDR48	-1
WDR62	1
WDR70	-1
WDR74	1
WIPF1	-1
WIPI1	-1
WIPI2	-1
WIPI2	-1
XPC	-1
XPOT	1
YARS	1
YBX2	1
YIF1A	1
YPEL1	-1
YPEL5	-1
YRDC	1
ZBED8	-1
ZBTB10	-1
ZDHHC7	-1
ZFYVE26	-1
ZHX2	-1
ZKSCAN4	-1
ZNF227	-1
ZNF277	-1
ZNF302	-1
ZNF318	-1
ZNF32	-1
ZNF33B	-1
ZNF345	-1
ZNF350	-1
ZNF394	-1
ZNF473	1
ZYX	1

## Sheet: cAMP
LPL
PNP
SOX9
PCSK1
CD55
IL6
BDKRB2
BDKRB1
IGF1R
PDE3A
PDE3B
POLR2A
ACER2
SLC6A17
SH3PXD2B
SH3BP5
RGL3
ST3GAL5
TUBB2A
ZBTB38
TMEM184A
PID1
PCP4L1
MCF2L
GK
PDE10A
NHS
C11orf96
TACC1
FGFR1
PCSK1
LIMS1
SLC1A2
PDE4D
PDE4D
KLF9
BZW1
USP2
TOB1
PDE3A
WNT5A
CHD1
BASP1
TWIST2
ITPRIP
DIO3
DUSP4
EREG
FOXC1
B4GALT1
CXCL1
HAS1
ID4
IGFBP4
ATP1B3
CCR7
ENPEP
FGF7
GAS1
INHBA
ISG20
MAN2A1
MN1
MSX1
MSX2
NPTX1
ODC1
PAPPA
PCK1
PDK4
PRKAR1A
MAPK4
PRPS2
PVRL1
RGS2
SLC22A5
STC1
PTP4A1
SCG2
SLC7A5
IL18R1
IL1RL1
FGF18
GPRC5A
RHOB
FCER1G
HOMER1
DUSP1
ACSL4
GALNT2
IDI1
TGM2
EIF2AK3
AQP3
DNASE1L3
JARID2
ADAMTS4
ISG15
GFPT2
FOS

[truncated: 3 more sheets: SASP, AST, Fat Browing]
