# Supplementary material for: A risk-associated Active transcriptome phenotype expressed by histologically normal human breast tissue and linked to a pro-tumorigenic adipocyte population
Source: Breast Cancer Res. 2020 Jul 31;22:81. doi: 10.1186/s13058-020-01322-6 (PMC7395362; doi:10.1186/s13058-020-01322-6)
Supplement: Supplementary file 4 — Additional file 4: Supplement Table 3. Rank ordered GSEA (www.gsea-msigdb.org/gsea) analysis showing 186 gene sets upregulated (from total set of 18,408 gene sets) in the batch-integrated Active vs. Inactive transcriptome samples, at FDR ≤ 10%. Also shown are their individual nominal p-values, FDR q-values, their gene set size, and the 21 (11.2%) that are specifically involved in adipose-associated pathways. [file 13058_2020_1322_MOESM4_ESM.xlsx]

## Sheet: gsea_report_for_active_with_top
NAME	top_adipose_gene_set	SIZE	ES	NES	NOM p-val	FDR q-val	FWER p-val	RANK AT MAX	LEADING EDGE
NEGATIVE REGULATION OF BLOOD VESSEL ENDOTHELIAL CELL MIGRATION%GOBP%GO:0043537	no	31	0.699037	2.04262	0	0.0701165	0.164	2754	tags=45%, list=14%, signal=53%
TRANSCRIPTIONAL REGULATION OF WHITE ADIPOCYTE DIFFERENTIATION%REACTOME%R-HSA-381340.2	yes	83	0.546854	2.12174	0	0.0717752	0.064	662	tags=16%, list=3%, signal=16%
HALLMARK_ADIPOGENESIS%MSIGDB_C2%HALLMARK_ADIPOGENESIS	yes	199	0.733119	2.01303	0	0.0797471	0.225	2809	tags=61%, list=15%, signal=70%
GLYCOGEN SYNTHESIS AND DEGRADATION%WIKIPATHWAYS_20190310%WP500%HOMO SAPIENS	no	40	0.651915	2.01988	0	0.0801939	0.207	1185	tags=30%, list=6%, signal=32%
PATHWAYS IN CLEAR CELL RENAL CELL CARCINOMA%WIKIPATHWAYS_20190310%WP4018%HOMO SAPIENS	no	84	0.54264	2.04352	0	0.0836189	0.164	3024	tags=37%, list=16%, signal=44%
CELLULAR RESPIRATION%GOBP%GO:0045333	no	131	0.645031	1.83196	0.00394477	0.0855868	0.742	4192	tags=60%, list=22%, signal=77%
POSITIVE REGULATION OF ADHERENS JUNCTION ORGANIZATION%GOBP%GO:1903393	no	24	0.584603	1.83056	0	0.0858687	0.744	1511	tags=29%, list=8%, signal=32%
CELLULAR RESPONSE TO CARBOHYDRATE STIMULUS%GOBP%GO:0071322	no	36	0.521555	1.83981	0.00606061	0.0858772	0.722	1069	tags=25%, list=6%, signal=26%
REGULATION OF SPROUTING ANGIOGENESIS%GOBP%GO:1903670	no	60	0.636352	2.08416	0	0.0863012	0.107	2386	tags=45%, list=12%, signal=51%
ST_G_ALPHA_S_PATHWAY%MSIGDB_C2%ST_G_ALPHA_S_PATHWAY	no	16	0.665107	1.83224	0.00393701	0.0863906	0.741	3617	tags=44%, list=19%, signal=54%
REGULATION OF EPITHELIAL CELL MIGRATION%GOBP%GO:0010632	no	188	0.427424	1.81299	0	0.0866026	0.778	3710	tags=36%, list=19%, signal=44%
ANGIOGENESIS%WIKIPATHWAYS_20190310%WP1539%HOMO SAPIENS	no	24	0.634753	1.84021	0.00190476	0.0867341	0.722	3012	tags=46%, list=16%, signal=54%
NEGATIVE REGULATION OF FOCAL ADHESION ASSEMBLY%GOBP%GO:0051895	no	16	0.679208	1.81371	0.00767754	0.0867911	0.777	2092	tags=44%, list=11%, signal=49%
POSITIVE REGULATION OF FAT CELL DIFFERENTIATION%GOBP%GO:0045600	yes	42	0.579271	1.83302	0.00393701	0.0868349	0.74	2690	tags=43%, list=14%, signal=50%
REGULATION OF CELL MIGRATION INVOLVED IN SPROUTING ANGIOGENESIS%GOBP%GO:0090049	no	32	0.714562	2.05661	0	0.0868423	0.142	2994	tags=59%, list=16%, signal=70%
RESPIRATORY ELECTRON TRANSPORT%REACTOME DATABASE ID RELEASE 68%611105	no	90	0.699189	1.83362	0.00196078	0.0872744	0.739	3608	tags=63%, list=19%, signal=78%
PURINE RIBONUCLEOSIDE TRIPHOSPHATE BIOSYNTHETIC PROCESS%GOBP%GO:0009206	no	59	0.527224	1.81416	0.00394477	0.0873835	0.777	4995	tags=59%, list=26%, signal=80%
MITOCHONDRIAL ATP SYNTHESIS COUPLED ELECTRON TRANSPORT%GOBP%GO:0042775	no	70	0.718632	1.82771	0.00395257	0.0874483	0.75	3608	tags=66%, list=19%, signal=81%
COENZYME BIOSYNTHETIC PROCESS%GOBP%GO:0009108	no	144	0.516941	1.82326	0.00195312	0.0874845	0.758	2127	tags=27%, list=11%, signal=30%
REGULATION OF GLUCOSE IMPORT%GOBP%GO:0046324	no	34	0.57249	1.82659	0.00196078	0.0875672	0.752	2445	tags=35%, list=13%, signal=40%
RESPIRATORY ELECTRON TRANSPORT CHAIN%GOBP%GO:0022904	no	84	0.693516	1.81097	0.00197239	0.087752	0.786	3608	tags=63%, list=19%, signal=77%
ATP SYNTHESIS COUPLED ELECTRON TRANSPORT%GOBP%GO:0042773	no	71	0.720515	1.81001	0.00402414	0.0877672	0.788	3608	tags=66%, list=19%, signal=81%
PID_ER_NONGENOMIC_PATHWAY%MSIGDB_C2%PID_ER_NONGENOMIC_PATHWAY	no	41	0.569805	1.84036	0.00959693	0.0877905	0.722	5485	tags=71%, list=28%, signal=99%
POSITIVE REGULATION OF VASCULATURE DEVELOPMENT%GOBP%GO:1904018	no	139	0.478366	1.8089	0	0.0878374	0.79	2258	tags=35%, list=12%, signal=39%
POSITIVE REGULATION OF CELL MIGRATION INVOLVED IN SPROUTING ANGIOGENESIS%GOBP%GO:0090050	no	18	0.686901	1.81759	0	0.0879617	0.771	2232	tags=56%, list=12%, signal=63%
POSITIVE REGULATION OF CELLULAR RESPONSE TO TRANSFORMING GROWTH FACTOR BETA STIMULUS%GOBP%GO:1903846	no	21	0.561194	1.82378	0.00580271	0.0880611	0.756	2164	tags=24%, list=11%, signal=27%
ATP BIOSYNTHETIC PROCESS%GOBP%GO:0006754	no	57	0.540289	1.82162	0.0019685	0.0880733	0.762	4995	tags=60%, list=26%, signal=80%
PID_HDAC_CLASSIII_PATHWAY%MSIGDB_C2%PID_HDAC_CLASSIII_PATHWAY	no	25	0.536865	1.81831	0.00193798	0.0882247	0.769	2364	tags=32%, list=12%, signal=36%
NEGATIVE REGULATION OF CELL JUNCTION ASSEMBLY%GOBP%GO:1901889	no	21	0.626805	1.83382	0.00590551	0.0882269	0.739	2092	tags=38%, list=11%, signal=43%
REGULATION OF MACROPHAGE DERIVED FOAM CELL DIFFERENTIATION%GOBP%GO:0010743	no	29	0.702224	1.80417	0	0.0882487	0.8	569	tags=38%, list=3%, signal=39%
PURINE NUCLEOSIDE TRIPHOSPHATE BIOSYNTHETIC PROCESS%GOBP%GO:0009145	no	59	0.527224	1.81416	0.00394477	0.0883334	0.777	4995	tags=59%, list=26%, signal=80%
CELL-EXTRACELLULAR MATRIX INTERACTIONS%REACTOME DATABASE ID RELEASE 68%446353	no	15	0.725958	1.83475	0	0.0885023	0.738	2029	tags=47%, list=11%, signal=52%
RESPONSE TO GLUCOCORTICOID%GOBP%GO:0051384	no	33	0.600713	1.80711	0	0.0886087	0.795	3890	tags=55%, list=20%, signal=68%
OXIDATION-REDUCTION PROCESS%GOBP%GO:0055114	no	410	0.5342	1.80204	0.00196464	0.0887281	0.805	3492	tags=43%, list=18%, signal=52%
SIGNALING EVENTS MEDIATED BY FOCAL ADHESION KINASE%PATHWAY INTERACTION DATABASE NCI-NATURE CURATED DATA%SIGNALING EVENTS MEDIATED BY FOCAL ADHESION KINASE	no	58	0.481091	1.84068	0.0194553	0.088751	0.722	3584	tags=40%, list=19%, signal=49%
RESPONSE TO FLUID SHEAR STRESS%GOBP%GO:0034405	no	19	0.662803	1.80435	0.0133588	0.0888805	0.799	1696	tags=42%, list=9%, signal=46%
PLASMA MEMBRANE ESTROGEN RECEPTOR SIGNALING%PATHWAY INTERACTION DATABASE NCI-NATURE CURATED DATA%PLASMA MEMBRANE ESTROGEN RECEPTOR SIGNALING	no	40	0.565305	1.81971	0.0116279	0.0888969	0.766	5485	tags=70%, list=28%, signal=98%
ELECTRON TRANSPORT CHAIN%GOBP%GO:0022900	no	86	0.679331	1.80578	0.00195695	0.0890678	0.798	3608	tags=62%, list=19%, signal=75%
REGULATION OF VASCULATURE DEVELOPMENT%GOBP%GO:1901342	no	260	0.436997	1.81438	0	0.0890913	0.777	2258	tags=30%, list=12%, signal=34%
PID_S1P_S1P1_PATHWAY%MSIGDB_C2%PID_S1P_S1P1_PATHWAY	no	21	0.640527	1.81843	0.00197239	0.0891015	0.769	3633	tags=57%, list=19%, signal=70%
POSITIVE REGULATION OF TRANSFORMING GROWTH FACTOR BETA RECEPTOR SIGNALING PATHWAY%GOBP%GO:0030511	no	21	0.561194	1.82378	0.00580271	0.089135	0.756	2164	tags=24%, list=11%, signal=27%
SIGNALING EVENTS MEDIATED BY VEGFR1 AND VEGFR2%PATHWAY INTERACTION DATABASE NCI-NATURE CURATED DATA%SIGNALING EVENTS MEDIATED BY VEGFR1 AND VEGFR2	no	68	0.450543	1.83543	0.0136719	0.0891398	0.735	3584	tags=34%, list=19%, signal=41%
CELLULAR RESPONSE TO CORTICOSTEROID STIMULUS%GOBP%GO:0071384	no	20	0.693103	1.81525	0.00197239	0.0891685	0.776	3890	tags=65%, list=20%, signal=81%
TRANSCRIPTION FACTOR REGULATION IN ADIPOGENESIS%WIKIPATHWAYS_20190310%WP3599%HOMO SAPIENS	yes	22	0.728626	1.80461	0	0.0894611	0.798	3477	tags=68%, list=18%, signal=83%
INTEGRATION OF ENERGY METABOLISM%REACTOME DATABASE ID RELEASE 68%163685	no	107	0.465003	1.80205	0	0.089564	0.805	2242	tags=29%, list=12%, signal=33%
BIOCARTA_LONGEVITY_PATHWAY%MSIGDB_C2%BIOCARTA_LONGEVITY_PATHWAY	no	15	0.656575	1.78264	0.00382409	0.0897847	0.837	2281	tags=40%, list=12%, signal=45%
GENERATION OF PRECURSOR METABOLITES AND ENERGY%GOBP%GO:0006091	no	272	0.571529	1.84092	0.004	0.0898346	0.722	3492	tags=47%, list=18%, signal=57%
CELLULAR RESPONSE TO GLUCOCORTICOID STIMULUS%GOBP%GO:0071385	no	18	0.659186	1.7819	0.004	0.0899012	0.839	3890	tags=61%, list=20%, signal=77%
THE CITRIC ACID (TCA) CYCLE AND RESPIRATORY ELECTRON TRANSPORT%REACTOME DATABASE ID RELEASE 68%1428517	no	161	0.635026	1.84952	0.00392157	0.0901531	0.697	3486	tags=58%, list=18%, signal=70%
AMP-ACTIVATED PROTEIN KINASE (AMPK) SIGNALING%WIKIPATHWAYS_20190310%WP1403%HOMO SAPIENS	no	68	0.488312	1.79972	0.00198807	0.0901733	0.806	4078	tags=37%, list=21%, signal=46%
CARBOHYDRATE HOMEOSTASIS%GOBP%GO:0033500	no	101	0.489911	1.84527	0.00204918	0.0902152	0.706	2267	tags=29%, list=12%, signal=32%
PYRUVATE METABOLIC PROCESS%GOBP%GO:0006090	no	58	0.581971	1.7835	0	0.0902823	0.833	2787	tags=41%, list=14%, signal=48%
PYRUVATE METABOLISM AND CITRIC ACID (TCA) CYCLE%REACTOME%R-HSA-71406.1	no	54	0.582472	1.78284	0.00590551	0.0903093	0.837	2334	tags=46%, list=12%, signal=53%
GLUCOSE HOMEOSTASIS%GOBP%GO:0042593	no	100	0.492423	1.84817	0	0.0903496	0.701	2267	tags=29%, list=12%, signal=33%
NONGENOTROPIC ANDROGEN SIGNALING%PATHWAY INTERACTION DATABASE NCI-NATURE CURATED DATA%NONGENOTROPIC ANDROGEN SIGNALING	no	31	0.530375	1.78549	0.0101833	0.0905097	0.83	1827	tags=23%, list=9%, signal=25%
RESPONSE TO CORTICOSTEROID%GOBP%GO:0031960	no	37	0.615753	1.85042	0.00192678	0.0907346	0.696	3890	tags=57%, list=20%, signal=71%
LIPID METABOLISM PATHWAY%WIKIPATHWAYS_20190310%WP3965%HOMO SAPIENS	yes	29	0.655612	1.78367	0.0138067	0.0908907	0.833	3229	tags=55%, list=17%, signal=66%
REGULATION OF LIPID STORAGE%GOBP%GO:0010883	yes	42	0.565101	1.78412	0.00192308	0.0911071	0.833	2885	tags=45%, list=15%, signal=53%
REGULATION OF FIBROBLAST MIGRATION%GOBP%GO:0010762	no	16	0.695294	1.84097	0	0.0911099	0.722	2827	tags=56%, list=15%, signal=66%
REGULATION OF FATTY ACID METABOLIC PROCESS%GOBP%GO:0019217	yes	60	0.552272	1.85395	0	0.0912382	0.687	2423	tags=33%, list=13%, signal=38%
PID_AR_NONGENOMIC_PATHWAY%MSIGDB_C2%PID_AR_NONGENOMIC_PATHWAY	no	31	0.530375	1.78549	0.0101833	0.0912456	0.83	1827	tags=23%, list=9%, signal=25%
REGULATION OF ANGIOGENESIS%GOBP%GO:0045765	no	232	0.453095	1.84574	0	0.0912856	0.705	2258	tags=31%, list=12%, signal=35%
TRIACYLGLYCERIDE SYNTHESIS%WIKIPATHWAYS_20190310%WP325%HOMO SAPIENS	no	21	0.740186	1.77951	0.00408998	0.0913616	0.843	1054	tags=43%, list=5%, signal=45%
ATP SYNTHESIS COUPLED PROTON TRANSPORT%GOBP%GO:0015986	no	21	0.671898	1.78603	0.00980392	0.0913645	0.83	4646	tags=76%, list=24%, signal=100%
RESPIRATORY ELECTRON TRANSPORT, ATP SYNTHESIS BY CHEMIOSMOTIC COUPLING, AND HEAT PRODUCTION BY UNCOUPLING PROTEINS.%REACTOME DATABASE ID RELEASE 68%163200	no	111	0.680367	1.8433	0.0019685	0.091369	0.714	4396	tags=69%, list=23%, signal=89%
CELLULAR RESPONSE TO INSULIN STIMULUS%GOBP%GO:0032869	no	117	0.424649	1.79343	0.00406504	0.091477	0.818	2381	tags=24%, list=12%, signal=27%
BIOCARTA_IL6_PATHWAY%MSIGDB_C2%BIOCARTA_IL6_PATHWAY	no	22	0.590187	1.78872	0.0117417	0.0916137	0.827	3584	tags=45%, list=19%, signal=56%
PID_VEGFR1_2_PATHWAY%MSIGDB_C2%PID_VEGFR1_2_PATHWAY	no	69	0.441158	1.79729	0.0178218	0.091649	0.812	3584	tags=33%, list=19%, signal=41%
REGULATION OF LIPID METABOLIC PROCESS%GOBP%GO:0019216	yes	306	0.41759	1.78999	0.00389105	0.0918098	0.823	2445	tags=25%, list=13%, signal=28%
OXIDATIVE PHOSPHORYLATION%GOBP%GO:0006119	no	92	0.688484	1.79087	0.006	0.0918253	0.822	4396	tags=73%, list=23%, signal=94%
CELLULAR RESPONSE TO HEXOSE STIMULUS%GOBP%GO:0071331	no	31	0.542006	1.85499	0.00401606	0.0918455	0.685	1069	tags=26%, list=6%, signal=27%
PID_S1P_S1P3_PATHWAY%MSIGDB_C2%PID_S1P_S1P3_PATHWAY	no	29	0.598022	1.79165	0.0060241	0.0919154	0.82	3633	tags=52%, list=19%, signal=64%
REGULATION OF COLD-INDUCED THERMOGENESIS%GOBP%GO:0120161	no	141	0.515935	1.85061	0	0.0919577	0.693	3071	tags=41%, list=16%, signal=49%
NEGATIVE REGULATION OF EPITHELIAL CELL MIGRATION%GOBP%GO:0010633	no	60	0.496279	1.79227	0.00590551	0.0919788	0.82	3024	tags=33%, list=16%, signal=39%
RESPONSE TO HYDROGEN PEROXIDE%GOBP%GO:0042542	no	51	0.503251	1.78768	0.00842105	0.0919924	0.827	3458	tags=43%, list=18%, signal=52%
LIPID OXIDATION%GOBP%GO:0034440	yes	65	0.60487	1.74996	0.0077821	0.0920572	0.884	1930	tags=38%, list=10%, signal=43%
ENERGY COUPLED PROTON TRANSPORT, DOWN ELECTROCHEMICAL GRADIENT%GOBP%GO:0015985	no	21	0.671898	1.78603	0.00980392	0.0921196	0.83	4646	tags=76%, list=24%, signal=100%
RIBONUCLEOSIDE BISPHOSPHATE BIOSYNTHETIC PROCESS%GOBP%GO:0034030	no	48	0.554727	1.7514	0.013834	0.0921213	0.883	2388	tags=38%, list=12%, signal=43%
RESPONSE TO PEPTIDE%GOBP%GO:1901652	no	264	0.398521	1.78887	0	0.0922202	0.827	2403	tags=23%, list=12%, signal=26%
OXIDATIVE PHOSPHORYLATION%WIKIPATHWAYS_20190310%WP623%HOMO SAPIENS	no	51	0.724222	1.79515	0.00784314	0.0922503	0.817	4163	tags=76%, list=22%, signal=97%
SIGNAL TRANSDUCTION BY L1%REACTOME DATABASE ID RELEASE 68%445144	no	20	0.617664	1.78662	0.0143443	0.0922572	0.829	3527	tags=45%, list=18%, signal=55%
INTERLEUKIN-6-MEDIATED SIGNALING PATHWAY%GOBP%GO:0070102	no	16	0.699863	1.79348	0.00196078	0.0922681	0.818	4105	tags=63%, list=21%, signal=79%
TRIGLYCERIDE METABOLISM%REACTOME%R-HSA-8979227.1	no	37	0.651185	1.79423	0.00205339	0.092272	0.817	2457	tags=41%, list=13%, signal=46%
PRIMARY ALCOHOL METABOLIC PROCESS%GOBP%GO:0034308	no	53	0.600618	1.75061	0.00775194	0.092385	0.884	2289	tags=42%, list=12%, signal=47%
RESPONSE TO INSULIN%GOBP%GO:0032868	no	130	0.429118	1.84105	0	0.0924132	0.722	2381	tags=23%, list=12%, signal=26%
PPAR SIGNALING PATHWAY%WIKIPATHWAYS_20190310%WP3942%HOMO SAPIENS	no	68	0.608774	1.74996	0.00393701	0.0925479	0.884	1645	tags=35%, list=9%, signal=38%
ELECTRON TRANSPORT CHAIN (OXPHOS SYSTEM IN MITOCHONDRIA)%WIKIPATHWAYS_20190310%WP111%HOMO SAPIENS	no	89	0.6987	1.79565	0.00399202	0.0926171	0.815	4396	tags=74%, list=23%, signal=96%
NUCLEOSIDE BISPHOSPHATE BIOSYNTHETIC PROCESS%GOBP%GO:0033866	no	48	0.554727	1.7514	0.013834	0.0926477	0.883	2388	tags=38%, list=12%, signal=43%
CELLULAR RESPONSE TO LIPOPROTEIN PARTICLE STIMULUS%GOBP%GO:0071402	yes	22	0.649912	1.74693	0.012	0.0928672	0.884	2004	tags=41%, list=10%, signal=46%
ANTIBIOTIC CATABOLIC PROCESS%GOBP%GO:0017001	no	42	0.689012	1.77725	0	0.0928852	0.845	3545	tags=60%, list=18%, signal=73%
NADH DEHYDROGENASE COMPLEX ASSEMBLY%GOBP%GO:0010257	no	58	0.679032	1.75217	0.00598802	0.0929694	0.883	4058	tags=62%, list=21%, signal=78%
ACYL-COA METABOLIC PROCESS%GOBP%GO:0006637	no	81	0.59047	1.75445	0.003861	0.0929927	0.882	2388	tags=41%, list=12%, signal=46%
NEGATIVE REGULATION OF ADHERENS JUNCTION ORGANIZATION%GOBP%GO:1903392	no	17	0.684973	1.85096	0.00383877	0.0930406	0.693	3024	tags=53%, list=16%, signal=63%
PURINE NUCLEOSIDE BISPHOSPHATE BIOSYNTHETIC PROCESS%GOBP%GO:0034033	no	48	0.554727	1.7514	0.013834	0.0931802	0.883	2388	tags=38%, list=12%, signal=43%
AEROBIC ELECTRON TRANSPORT CHAIN%GOBP%GO:0019646	no	17	0.748448	1.74707	0.00961539	0.0932758	0.884	2472	tags=59%, list=13%, signal=67%
MITOCHONDRIAL CALCIUM ION HOMEOSTASIS%GOBP%GO:0051560	no	21	0.62113	1.75862	0	0.0934657	0.877	4260	tags=62%, list=22%, signal=79%
MITOCHONDRIAL RESPIRATORY CHAIN COMPLEX I ASSEMBLY%GOBP%GO:0032981	no	58	0.679032	1.75217	0.00598802	0.0935099	0.883	4058	tags=62%, list=21%, signal=78%
THIOESTER METABOLIC PROCESS%GOBP%GO:0035383	no	81	0.59047	1.75445	0.003861	0.0935463	0.882	2388	tags=41%, list=12%, signal=46%
CELLULAR RESPONSE TO MONOSACCHARIDE STIMULUS%GOBP%GO:0071326	no	31	0.542006	1.85499	0.00401606	0.0935464	0.685	1069	tags=26%, list=6%, signal=27%
MITOCHONDRIAL ELECTRON TRANSPORT, CYTOCHROME C TO OXYGEN%GOBP%GO:0006123	no	17	0.748448	1.74707	0.00961539	0.0937912	0.884	2472	tags=59%, list=13%, signal=67%
ANGIOPOIETIN RECEPTOR TIE2-MEDIATED SIGNALING%PATHWAY INTERACTION DATABASE NCI-NATURE CURATED DATA%ANGIOPOIETIN RECEPTOR TIE2-MEDIATED SIGNALING	no	49	0.579833	1.86435	0	0.0938046	0.657	2594	tags=39%, list=13%, signal=45%
LEPTIN SIGNALING PATHWAY%WIKIPATHWAYS_20190310%WP2034%HOMO SAPIENS	no	76	0.413394	1.77046	0.0234834	0.0938281	0.855	4576	tags=37%, list=24%, signal=48%
PURINE RIBONUCLEOSIDE TRIPHOSPHATE METABOLIC PROCESS%GOBP%GO:0009205	no	172	0.543761	1.75884	0.00392927	0.0938282	0.877	4175	tags=52%, list=22%, signal=65%
CELLULAR RESPONSE TO PEPTIDE%GOBP%GO:1901653	no	223	0.402194	1.75763	0	0.0938541	0.878	2985	tags=29%, list=15%, signal=34%
NOTCH1 REGULATION OF HUMAN ENDOTHELIAL CELL CALCIFICATION%WIKIPATHWAYS_20190310%WP3413%HOMO SAPIENS	no	17	0.62406	1.7548	0.0100604	0.0938586	0.882	3107	tags=53%, list=16%, signal=63%
REGULATION OF CELLULAR KETONE METABOLIC PROCESS%GOBP%GO:0010565	no	139	0.484839	1.75704	0.00387597	0.0938944	0.878	2785	tags=32%, list=14%, signal=37%
PURINE NUCLEOSIDE TRIPHOSPHATE METABOLIC PROCESS%GOBP%GO:0009144	no	176	0.535558	1.75231	0.00588235	0.0939399	0.883	4396	tags=53%, list=23%, signal=68%
INSULIN SIGNALING PATHWAY%KEGG%HSA04910	no	138	0.436526	1.75528	0.00204499	0.0939965	0.881	2987	tags=28%, list=16%, signal=33%
REGULATION OF LIPID CATABOLIC PROCESS%GOBP%GO:0050994	yes	37	0.659498	1.77085	0.00767754	0.0941319	0.855	2423	tags=43%, list=13%, signal=49%
NEGATIVE REGULATION OF PROTEIN LOCALIZATION TO CELL PERIPHERY%GOBP%GO:1904376	no	22	0.558843	1.75914	0.00404858	0.094158	0.875	2382	tags=36%, list=12%, signal=41%
CELLULAR RESPONSE TO GLUCOSE STIMULUS%GOBP%GO:0071333	no	29	0.52348	1.75258	0.00623701	0.0942674	0.882	1069	tags=24%, list=6%, signal=26%
REGULATION OF TRANSCRIPTION FROM RNA POLYMERASE II PROMOTER IN RESPONSE TO HYPOXIA%GOBP%GO:0061418	no	75	0.548226	1.74709	0.0156556	0.0942791	0.884	4958	tags=57%, list=26%, signal=77%
ESTROGEN SIGNALING PATHWAY%WIKIPATHWAYS_20190310%WP712%HOMO SAPIENS	no	23	0.544547	1.74503	0.0132075	0.0942992	0.884	6293	tags=57%, list=33%, signal=84%
REGULATION OF CELL JUNCTION ASSEMBLY%GOBP%GO:1901888	no	74	0.512313	1.98691	0.00191939	0.0944723	0.297	3070	tags=39%, list=16%, signal=46%
FATTY-ACYL-COA METABOLIC PROCESS%GOBP%GO:0035337	yes	38	0.623634	1.75534	0.0116732	0.0945448	0.881	3225	tags=47%, list=17%, signal=57%
REGULATION OF ENDOTHELIAL CELL DIFFERENTIATION%GOBP%GO:0045601	no	23	0.564224	1.77518	0	0.0945696	0.849	1368	tags=30%, list=7%, signal=33%
AEROBIC RESPIRATION%GOBP%GO:0009060	no	65	0.615909	1.76919	0.00785855	0.0945819	0.858	4384	tags=60%, list=23%, signal=77%
ATP METABOLIC PROCESS%GOBP%GO:0046034	no	152	0.56041	1.75929	0.00392157	0.094594	0.875	4175	tags=55%, list=22%, signal=69%
COMPLEX I BIOGENESIS%REACTOME%R-HSA-6799198.1	no	49	0.716957	1.77112	0.00401606	0.0946544	0.855	3462	tags=63%, list=18%, signal=77%
PURINE RIBONUCLEOTIDE BIOSYNTHETIC PROCESS%GOBP%GO:0009152	no	138	0.468303	1.75574	0.00399202	0.094667	0.88	3301	tags=37%, list=17%, signal=44%
RESPONSE TO HEXOSE%GOBP%GO:0009746	no	56	0.533679	1.86522	0	0.0947972	0.655	1069	tags=20%, list=6%, signal=21%
REGULATION OF AUTOPHAGY OF MITOCHONDRION%GOBP%GO:1903146	no	27	0.502995	1.7635	0.0159046	0.0949377	0.868	5281	tags=52%, list=27%, signal=71%
MAINTENANCE OF LOCATION%GOBP%GO:0051235	no	136	0.430389	1.74381	0	0.094973	0.887	3296	tags=35%, list=17%, signal=41%
POSITIVE REGULATION OF ANGIOGENESIS%GOBP%GO:0045766	no	124	0.483485	1.75943	0.0020202	0.0950188	0.875	2258	tags=35%, list=12%, signal=39%
SCAVENGING BY CLASS A RECEPTORS%REACTOME%R-HSA-3000480.1	no	19	0.73721	1.74326	0.00601202	0.0950314	0.887	3865	tags=68%, list=20%, signal=86%
BIOCARTA_PPARA_PATHWAY%MSIGDB_C2%BIOCARTA_PPARA_PATHWAY	no	57	0.486365	1.7662	0.00401606	0.0950914	0.863	2016	tags=21%, list=10%, signal=23%
NEGATIVE REGULATION OF SPROUTING ANGIOGENESIS%GOBP%GO:1903671	no	23	0.603433	1.85509	0.00795229	0.0951887	0.685	2754	tags=39%, list=14%, signal=46%
ADRENERGIC RECEPTOR SIGNALING PATHWAY%GOBP%GO:0071875	no	21	0.705105	1.77126	0.00203252	0.0952052	0.855	1234	tags=33%, list=6%, signal=36%
OXIDATIVE STRESS%WIKIPATHWAYS_20190310%WP408%HOMO SAPIENS	no	33	0.698563	1.96647	0	0.0952081	0.349	2017	tags=45%, list=10%, signal=51%
MAINTENANCE OF PROTEIN LOCATION%GOBP%GO:0045185	no	96	0.41818	1.76189	0.00380952	0.0953073	0.871	3296	tags=32%, list=17%, signal=39%
CELLULAR RESPONSE TO KETONE%GOBP%GO:1901655	no	38	0.574233	1.76522	0	0.0953243	0.863	2780	tags=39%, list=14%, signal=46%
CELLULAR COMPONENT DISASSEMBLY INVOLVED IN EXECUTION PHASE OF APOPTOSIS%GOBP%GO:0006921	no	26	0.531206	1.76242	0.0059761	0.0953934	0.87	1065	tags=19%, list=6%, signal=20%
NANOPARTICLE-MEDIATED ACTIVATION OF RECEPTOR SIGNALING%WIKIPATHWAYS_20190310%WP2643%HOMO SAPIENS	no	28	0.538841	1.75962	0.00963391	0.095396	0.875	2594	tags=36%, list=13%, signal=41%
THIOESTER BIOSYNTHETIC PROCESS%GOBP%GO:0035384	no	35	0.638152	1.76024	0.0157791	0.0953997	0.875	2388	tags=49%, list=12%, signal=55%
VASCULAR PROCESS IN CIRCULATORY SYSTEM%GOBP%GO:0003018	no	85	0.510425	1.76643	0.00201207	0.0955025	0.862	1549	tags=31%, list=8%, signal=33%
PURINE RIBONUCLEOTIDE METABOLIC PROCESS%GOBP%GO:0009150	no	331	0.497609	1.76357	0.00392157	0.0955125	0.868	3619	tags=43%, list=19%, signal=52%
CITRATE CYCLE (TCA CYCLE)%KEGG%HSA00020	no	30	0.770953	1.77299	0.00399202	0.0955306	0.851	2176	tags=60%, list=11%, signal=68%
HALLMARK_TGF_BETA_SIGNALING%MSIGDB_C2%HALLMARK_TGF_BETA_SIGNALING	no	54	0.489961	1.76701	0.0140562	0.0955513	0.861	4351	tags=46%, list=23%, signal=60%
HALLMARK_FATTY_ACID_METABOLISM%MSIGDB_C2%HALLMARK_FATTY_ACID_METABOLISM	yes	156	0.585756	1.77219	0.00396825	0.0956928	0.851	2176	tags=39%, list=11%, signal=44%
REGULATION OF FATTY ACID OXIDATION%GOBP%GO:0046320	yes	22	0.67775	1.76395	0.0102249	0.0957601	0.867	2185	tags=41%, list=11%, signal=46%
N-CADHERIN SIGNALING EVENTS%PATHWAY INTERACTION DATABASE NCI-NATURE CURATED DATA%N-CADHERIN SIGNALING EVENTS	no	36	0.481926	1.76092	0.0120968	0.0957772	0.873	2355	tags=25%, list=12%, signal=28%
ENERGY RESERVE METABOLIC PROCESS%GOBP%GO:0006112	no	37	0.593079	1.77332	0.00389105	0.0958555	0.85	2314	tags=35%, list=12%, signal=40%
DETOXIFICATION OF REACTIVE OXYGEN SPECIES%REACTOME DATABASE ID RELEASE 68%3299685	no	33	0.619681	1.76735	0	0.0958588	0.861	2922	tags=45%, list=15%, signal=53%
ADENYLATE CYCLASE-ACTIVATING ADRENERGIC RECEPTOR SIGNALING PATHWAY%GOBP%GO:0071880	no	21	0.705105	1.77126	0.00203252	0.0959002	0.855	1234	tags=33%, list=6%, signal=36%
ACYL-COA BIOSYNTHETIC PROCESS%GOBP%GO:0071616	no	35	0.638152	1.76024	0.0157791	0.0960192	0.875	2388	tags=49%, list=12%, signal=55%
REGULATION OF ENDOTHELIAL CELL MIGRATION%GOBP%GO:0010594	no	138	0.518214	1.97234	0	0.0960594	0.337	2994	tags=34%, list=16%, signal=40%
POSITIVE REGULATION OF FOCAL ADHESION ASSEMBLY%GOBP%GO:0051894	no	18	0.617056	1.74022	0.0078125	0.0961245	0.89	1465	tags=33%, list=8%, signal=36%
REGULATION OF FATTY ACID BIOSYNTHETIC PROCESS%GOBP%GO:0042304	yes	33	0.617764	1.74159	0.008	0.0961462	0.89	2423	tags=39%, list=13%, signal=45%
FATTY ACID BETA-OXIDATION%GOBP%GO:0006635	yes	50	0.633542	1.74062	0.00583658	0.0962381	0.89	1455	tags=38%, list=8%, signal=41%
ST_P38_MAPK_PATHWAY%MSIGDB_C2%ST_P38_MAPK_PATHWAY	no	37	0.467625	1.73895	0.0160643	0.0962957	0.892	1963	tags=22%, list=10%, signal=24%
FATTY ACID OXIDATION%GOBP%GO:0019395	yes	64	0.610832	1.74078	0.00784314	0.0965553	0.89	1930	tags=39%, list=10%, signal=43%
POSITIVE REGULATION OF FATTY ACID METABOLIC PROCESS%GOBP%GO:0045923	yes	24	0.727942	1.87248	0	0.0965973	0.633	2185	tags=58%, list=11%, signal=66%
NEGATIVE REGULATION OF NUCLEOTIDE METABOLIC PROCESS%GOBP%GO:0045980	no	15	0.686135	1.73896	0.00823045	0.0967791	0.892	1936	tags=27%, list=10%, signal=30%
RESPONSE TO MONOSACCHARIDE%GOBP%GO:0034284	no	56	0.533679	1.86522	0	0.0968581	0.655	1069	tags=20%, list=6%, signal=21%
POSITIVE REGULATION OF ENDOTHELIAL CELL PROLIFERATION%GOBP%GO:0001938	no	73	0.559769	1.8552	0	0.0968807	0.685	1787	tags=36%, list=9%, signal=39%
BIOCARTA_ECM_PATHWAY%MSIGDB_C2%BIOCARTA_ECM_PATHWAY	no	24	0.584175	1.85667	0.0040568	0.0972883	0.678	2233	tags=38%, list=12%, signal=42%
HYDROGEN PEROXIDE CATABOLIC PROCESS%GOBP%GO:0042744	no	23	0.763824	1.72897	0.0021097	0.097907	0.9	3023	tags=70%, list=16%, signal=82%
RIBONUCLEOSIDE TRIPHOSPHATE BIOSYNTHETIC PROCESS%GOBP%GO:0009201	no	62	0.48277	1.72848	0.00587084	0.0979218	0.9	4995	tags=56%, list=26%, signal=76%
TRIGLYCERIDE CATABOLISM%REACTOME DATABASE ID RELEASE 68%163560	no	24	0.653813	1.72763	0.002	0.097923	0.901	2242	tags=38%, list=12%, signal=42%
NEGATIVE REGULATION OF CELLULAR PROTEIN LOCALIZATION%GOBP%GO:1903828	no	82	0.427845	1.72661	0.00392157	0.0979982	0.904	2382	tags=26%, list=12%, signal=29%
BIOCARTA_GPCR_PATHWAY%MSIGDB_C2%BIOCARTA_GPCR_PATHWAY	no	34	0.484303	1.72937	0.00801603	0.0980104	0.899	5488	tags=44%, list=28%, signal=62%
GLYCOGEN METABOLISM%REACTOME%R-HSA-8982491.1	no	26	0.648599	1.72979	0.0199203	0.0980186	0.899	794	tags=31%, list=4%, signal=32%
PARKINSON'S DISEASE%KEGG%HSA05012	no	116	0.645005	1.86614	0.00198807	0.0980262	0.652	4676	tags=68%, list=24%, signal=89%
RIBONUCLEOSIDE TRIPHOSPHATE METABOLIC PROCESS%GOBP%GO:0009199	no	175	0.528608	1.72787	0.00394477	0.098191	0.901	4175	tags=51%, list=22%, signal=64%
POSITIVE REGULATION OF ENDOTHELIAL CELL MIGRATION%GOBP%GO:0010595	no	89	0.539184	1.87284	0	0.0983463	0.63	3647	tags=42%, list=19%, signal=51%
POSITIVE REGULATION OF EPITHELIAL CELL MIGRATION%GOBP%GO:0010634	no	122	0.435557	1.73042	0.00197239	0.0983481	0.898	3647	tags=37%, list=19%, signal=45%
PPAR SIGNALING PATHWAY%KEGG%HSA03320	no	71	0.594336	1.72668	0.00399202	0.0983949	0.904	1645	tags=34%, list=9%, signal=37%
BIOCARTA_NFAT_PATHWAY%MSIGDB_C2%BIOCARTA_NFAT_PATHWAY	no	53	0.504004	1.72984	0.00194553	0.0984262	0.899	2713	tags=28%, list=14%, signal=33%
S1P1 PATHWAY%PATHWAY INTERACTION DATABASE NCI-NATURE CURATED DATA%S1P1 PATHWAY	no	19	0.612332	1.73071	0.00401606	0.0985652	0.898	3633	tags=53%, list=19%, signal=65%
MAINTENANCE OF PROTEIN LOCALIZATION IN ORGANELLE%GOBP%GO:0072595	no	34	0.592116	1.97734	0	0.0987543	0.324	5815	tags=59%, list=30%, signal=84%
RECEPTOR INTERNALIZATION%GOBP%GO:0031623	no	49	0.54551	1.73093	0.00398406	0.0988661	0.898	3655	tags=39%, list=19%, signal=48%
RESPONSE TO GLUCOSE%GOBP%GO:0009749	no	53	0.528995	1.86716	0	0.0989009	0.651	1069	tags=19%, list=6%, signal=20%
NEGATIVE REGULATION OF COLD-INDUCED THERMOGENESIS%GOBP%GO:0120163	no	46	0.608149	1.85687	0	0.0990603	0.677	2386	tags=41%, list=12%, signal=47%
RIBONUCLEOTIDE METABOLIC PROCESS%GOBP%GO:0009259	no	340	0.483526	1.72324	0.00396825	0.0991588	0.906	3619	tags=41%, list=19%, signal=50%
PID_FAK_PATHWAY%MSIGDB_C2%PID_FAK_PATHWAY	no	59	0.479067	1.85802	0.0135659	0.0992455	0.674	3584	tags=39%, list=19%, signal=48%
PID_S1P_S1P2_PATHWAY%MSIGDB_C2%PID_S1P_S1P2_PATHWAY	no	24	0.563741	1.7335	0.0137795	0.0992911	0.897	5882	tags=63%, list=31%, signal=90%
GLYCOSIDE METABOLIC PROCESS%GOBP%GO:0016137	no	17	0.724924	1.73094	0.00974659	0.0993344	0.898	2745	tags=35%, list=14%, signal=41%
POSITIVE REGULATION OF COLD-INDUCED THERMOGENESIS%GOBP%GO:0120162	no	96	0.50447	1.7313	0	0.0994247	0.898	1166	tags=27%, list=6%, signal=29%
RECEPTOR METABOLIC PROCESS%GOBP%GO:0043112	no	82	0.445446	1.72337	0	0.0994472	0.906	3730	tags=35%, list=19%, signal=44%
NONALCOHOLIC FATTY LIVER DISEASE%WIKIPATHWAYS_20190310%WP4396%HOMO SAPIENS	yes	150	0.500701	1.72468	0.0137255	0.0994577	0.906	3462	tags=43%, list=18%, signal=52%
FATTY ACID BIOSYNTHESIS%WIKIPATHWAYS_20190310%WP357%HOMO SAPIENS	yes	22	0.832916	1.7242	0.00397614	0.0995099	0.906	1392	tags=68%, list=7%, signal=73%
REGULATION OF CAMP-MEDIATED SIGNALING%GOBP%GO:0043949	no	24	0.6614	1.73269	0.00196078	0.099539	0.897	1056	tags=33%, list=5%, signal=35%
FATTY ACID TRANSPORT%GOBP%GO:0015908	yes	51	0.539927	1.72226	0.00203252	0.099661	0.907	1210	tags=27%, list=6%, signal=29%
VASCULOGENESIS%GOBP%GO:0001570	no	32	0.56011	1.72346	0.00779727	0.0997781	0.906	2386	tags=41%, list=12%, signal=46%
S1P2 PATHWAY%PATHWAY INTERACTION DATABASE NCI-NATURE CURATED DATA%S1P2 PATHWAY	no	24	0.563741	1.7335	0.0137795	0.0997977	0.897	5882	tags=63%, list=31%, signal=90%
INHIBITION OF EXOSOME BIOGENESIS AND SECRETION BY MANUMYCIN A IN CRPC CELLS%WIKIPATHWAYS_20190310%WP4301%HOMO SAPIENS	no	18	0.552452	1.7313	0.00796813	0.099911	0.898	6070	tags=61%, list=32%, signal=89%
